# Supplementary material for: ZBED6, a Novel Transcription Factor Derived from a Domesticated DNA Transposon Regulates IGF2 Expression and Muscle Growth
Source: PubMed Central journal article supplement (PMC2780926; doi:10.1371/journal.pbio.1000256), 2009-12-15
Supplement: pbio.1000256.s004.pdf [file pbio.1000256.s004.pdf]

Table S1. Zbed6 binding sites in mouse C2C12 cells identified using ChIP-sequencing. All peaks with at least 15 overlapping reads are listed and sorted according to the number of reads. Overlaps=Number of overlapping extended reads. Dist\_CpG=Distance to closest CpG island in base pair. Dist\_TSS=Distance to transcription start site in base pair. GeneID= Gene name.

| Peak region (+/- 250 BP)  | Overlaps | Dist_CpG | Dist_TSS | GeneID        |
|---------------------------|----------|----------|----------|---------------|
| chr17:39982690-39983190   | 190      | 0        | 500000   |               |
| chr6:143115180-143115680  | 166      | 0        | -319     | AK164928      |
| chr10:77084530-77085030   | 151      | 44       | -285     | Ube2g2        |
| chr11:102978410-102978910 | 150      | 0        | 1022     | Hexim1        |
| chr6:124946270-124946770  | 140      | 309      | -217     | C530028O21Rik |
| chr11:114944830-114945330 | 140      | 7684     | -7664    | Rab37         |
| chr7:107177800-107178300  | 138      | 12637    | 23102    | Chrdl2        |
| chr5:31190040-31190540    | 137      | 0        | -934     | Agbl5         |
| chr2:130123880-130124380  | 134      | 2167     | 2456     | Ebf4          |
| chr12:36883680-36884180   | 134      | 430      | 154      | Ankmy2        |
| chr7:142927910-142928410  | 134      | 19762    | -20119   | Ki-67         |
| chr17:5621830-5622330     | 129      | 500000   | 500000   |               |
| chr18:40467630-40468130   | 123      | 500000   | 49840    | Kctd16        |
| chr15:79927990-79928490   | 123      | 5927     | 6477     | Syngn1        |
| chrX:96132560-96133060    | 120      | 483      | -309     | Yipf6         |
| chr4:155609440-155609940  | 120      | 591      | -746     | Klhl17        |
| chr15:79301360-79301860   | 120      | 14144    | -29174   | Csnk1e        |
| chr12:88112740-88113240   | 117      | 45482    | -45590   | Angel1        |
| chr18:25213460-25213960   | 115      | 500000   | -11007   | Fhod3         |
| chr15:74917030-74917530   | 111      | 500000   | 25098    | Ly6c2         |
| chr5:36009910-36010410    | 110      | 11461    | 12270    | Htra3         |
| chr8:112222205-112222705  | 107      | 4816     | -5292    | 2400003C14Rik |
| chr3:89156995-89157495    | 106      | 2836     | -3314    | Adam15        |
| chr12:112667580-112668080 | 105      | 0        | 12175    | 1200009I06Rik |
| chr11:3059580-3060080     | 105      | 33170    | -1892    | Sfi1          |
| chr11:3095860-3096360     | 105      | 2408     | -2645    | Sfi1          |
| chr17:26250500-26251000   | 103      | 0        | 489      | Tmem8         |
| chr10:59413870-59414370   | 103      | 0        | 397      | Ddit4         |
| chr4:41587050-41587550    | 102      | 28       | 34       | 2310040A07Rik |
| chr5:31481740-31482240    | 101      | 0        | 526      | Gtf3c2        |
| chr9:122930070-122930570  | 99       | 0        | -123     | Tmem42        |
| chr10:61948720-61949220   | 98       | 66       | 375      | Vps26a        |
| chr11:3079380-3079880     | 96       | 13370    | 13835    | Sfi1          |
| chr14:76186230-76186730   | 96       | 0        | 363      | Slc25a30      |
| chr6:147212725-147213225  | 96       | 148      | -568     | Pthlh         |
| chr12:75008170-75008670   | 95       | 42       | -596     | Hif1a         |
| chr5:77787610-77788110    | 94       | 47980    | 48335    | Polr2b        |
| chr7:120350400-120350900  | 94       | 0        | -328     | Arntl         |
| chr2:112665580-112666080  | 92       | 500000   | 500000   |               |
| chr11:3087170-3087670     | 91       | 5580     | 6045     | Sfi1          |

|                           |    |        |        |               |
|---------------------------|----|--------|--------|---------------|
| chr8:13104630-13105130    | 91 | 0      | 462    | Pcid2         |
| chr17:36974240-36974740   | 91 | 99     | 405    | Trim26        |
| chr7:144506355-144506855  | 89 | 0      | -478   | Ebf3          |
| chr17:8845660-8846160     | 88 | 500000 | 500000 |               |
| chr11:3051150-3051650     | 88 | 27630  | -860   | BC025885      |
| chr9:103014360-103014860  | 87 | 0      | 207    | Rab6b         |
| chr4:109339520-109340020  | 87 | 0      | -509   | Cdkn2c        |
| chr11:3074245-3074745     | 87 | 18505  | -16557 | Sfi1          |
| chr11:3082350-3082850     | 86 | 10400  | 10865  | Sfi1          |
| chr2:181652090-181652590  | 85 | 500000 | 500000 |               |
| chr11:102179530-102180030 | 85 | 0      | 629    | Ubtf          |
| chr11:18920240-18920740   | 85 | 5      | -1808  | Meis1         |
| chr3:83567820-83568320    | 85 | 45     | -2172  | Sfrp2         |
| chr18:3005580-3006080     | 83 | 500000 | 500000 |               |
| chr11:60202360-60202860   | 81 | 27632  | 27896  | Atpaf2        |
| chr17:48233980-48234480   | 81 | 150    | -6903  | AK043085      |
| chr8:113782490-113782990  | 79 | 0      | 361    | Glg1          |
| chr15:58720040-58720540   | 79 | 0      | -562   | Rnf139        |
| chr11:3098800-3099300     | 79 | 3235   | -3344  | Eif4enif1     |
| chr1:197067670-197068170  | 77 | 0      | 500000 |               |
| chr3:69120720-69121220    | 77 | 0      | 131    | Ppm1l         |
| chr2:31526060-31526560    | 75 | 0      | 54     | Exosc2        |
| chr3:55465600-55466100    | 74 | 500000 | 500000 |               |
| chr19:10599770-10600270   | 74 | 0      | 265    | 5730453116Rik |
| chr17:80689350-80689850   | 74 | 0      | 49     | Mopt          |
| chr16:62786320-62786820   | 74 | 0      | -29    | Nsun3         |
| chr3:95118830-95119330    | 74 | 0      | -42    | AK144859      |
| chrX:166427080-166427580  | 74 | 100    | -2460  | AK019053      |
| chr9:24955630-24956130    | 73 | 0      | 194    | Herpud2       |
| chr13:96145042-96145542   | 73 | 0      | -2     | Aggf1         |
| chr10:127895650-127896150 | 73 | 0      | -449   | Smarcc2       |
| chrX:166432690-166433190  | 73 | 773    | -8070  | AK019053      |
| chr3:8246160-8246660      | 72 | 500000 | 500000 |               |
| chr4:102621540-102622040  | 72 | 500000 | -15329 | SGIP1alpha    |
| chr11:18968340-18968840   | 72 | 40976  | -49908 | Meis1         |
| chr2:32612950-32613450    | 71 | 175    | 410    | Tor2a         |
| chr9:21961440-21961940    | 71 | 10     | 401    | Pigyl         |
| chr5:108797030-108797530  | 71 | 315    | 26     | AK165889      |
| chr7:106529730-106530230  | 71 | 0      | -78    | Gdpd5         |
| chr7:149135220-149135720  | 71 | 0      | -185   | Brsk2         |
| chr11:60512865-60513365   | 71 | 81     | -226   | Llg1          |
| chr14:21894820-21895320   | 71 | 0      | -303   | Adk           |
| chr16:32430450-32430950   | 71 | 3      | -381   | Pcyt1a        |
| chr8:73027440-73027940    | 70 | 336    | 487    | CRLM3         |
| chr9:94437810-94438310    | 70 | 0      | 439    | 1190002N15Rik |
| chr11:53953810-53954310   | 69 | 39187  | 12866  | P4ha2         |

|                           |    |        |        |               |
|---------------------------|----|--------|--------|---------------|
| chr11:74185050-74185550   | 69 | 500000 | 7128   | Olfr412       |
| chr10:67739140-67739640   | 69 | 357    | 2083   | Arid5b        |
| chr5:149982710-149983210  | 68 | 12729  | 12678  | AK082086      |
| chr9:64989480-64989980    | 68 | 0      | 735    | Punc          |
| chr19:12576080-12576580   | 68 | 41     | 304    | Dtx4          |
| chr8:85689245-85689745    | 68 | 0      | 245    | Tbc1d9        |
| chr9:106105340-106105840  | 68 | 0      | 152    | Twf2          |
| chr1:183672710-183673210  | 66 | 500000 | 1794   | A230079K17Rik |
| chr6:38586130-38586630    | 66 | 0      | 858    | Klrg2         |
| chr17:47896630-47897130   | 66 | 21380  | 588    | AK195221      |
| chr13:63674970-63675470   | 66 | 180    | -8393  | Ptch1         |
| chr15:36645520-36646020   | 65 | 500000 | 500000 |               |
| chr4:151726315-151726815  | 65 | 10774  | 13806  | Chd5          |
| chr15:97826530-97827030   | 65 | 5541   | 8295   | Col2a1        |
| chr6:95068205-95068705    | 65 | 0      | 556    | Kbtbd8        |
| chr15:85219610-85220110   | 64 | 500000 | 500000 |               |
| chr19:45724400-45724900   | 64 | 9512   | 10032  | Fbxw4         |
| chr5:67009625-67010125    | 64 | 0      | 34     | Apbb2         |
| chr15:88693685-88694185   | 63 | 0      | 1312   | Pim3          |
| chr6:39369310-39369810    | 63 | 18     | 214    | Mkrn1         |
| chr11:20531880-20532380   | 62 | 0      | 151    | Sertad2       |
| chr6:124813950-124814450  | 62 | 223    | -266   | Gpr162        |
| chr7:120513260-120513760  | 62 | 10     | -658   | Btbd10        |
| chr7:140315855-140316355  | 62 | 0      | -940   | Ctbp2         |
| chr14:55615015-55615515   | 62 | 18394  | -1880  | Myh7          |
| chr4:132567525-132568025  | 61 | 0      | 355    | Ahdc1         |
| chr17:27194460-27194960   | 61 | 185    | 230    | Itpr3         |
| chr11:87172040-87172540   | 61 | 0      | 205    | Ppm1e         |
| chr5:119010580-119011080  | 61 | 0      | 103    | Med13l        |
| chr16:4419265-4419765     | 61 | 121    | 72     | Adcy9         |
| chr16:26105890-26106390   | 61 | 126    | -271   | Leprel1       |
| chr11:49699940-49700440   | 61 | 14894  | -15146 | Rasgef1c      |
| chr9:122565150-122565650  | 60 | 500000 | 500000 |               |
| chr11:19958860-19959360   | 60 | 37846  | 500000 |               |
| chr17:29237545-29238045   | 60 | 2188   | 2644   | Cdkn1a        |
| chr12:76835790-76836290   | 60 | 188    | 606    | Sgpp1         |
| chr10:86193560-86194060   | 59 | 25100  | 18301  | BC030307      |
| chr11:5873910-5874410     | 59 | 1753   | 4354   | Camk2b        |
| chr1:24620400-24620900    | 59 | 26634  | 1000   | Atpase6       |
| chr10:11063260-11063760   | 59 | 0      | 268    | Epm2a         |
| chr9:66793795-66794295    | 59 | 0      | 121    | Rps27l        |
| chr3:55464700-55465200    | 58 | 500000 | 500000 |               |
| chr18:3008505-3009005     | 58 | 500000 | 500000 |               |
| chr11:114530070-114530570 | 58 | 0      | 464    | Rpl38         |
| chr11:105946210-105946710 | 58 | 0      | 245    | Map3k3        |
| chr5:45841105-45841605    | 58 | 0      | 40     | Qdpr          |

|                           |    |        |        |               |
|---------------------------|----|--------|--------|---------------|
| chr12:85516570-85517070   | 57 | 16798  | 18159  | C130039O16Rik |
| chr18:16966380-16966880   | 57 | 0      | 1124   | Cdh2          |
| chr6:86347190-86347690    | 57 | 215    | -327   | Pcyox1        |
| chr13:3372110-3372610     | 56 | 11772  | 500000 |               |
| chr9:62566130-62566630    | 56 | 40634  | 40713  | Itga11        |
| chr19:61275435-61275935   | 56 | 25311  | 28576  | Csf2ra        |
| chr12:85533410-85533910   | 55 | 0      | 1319   | C130039O16Rik |
| chr8:113823480-113823980  | 55 | 0      | 391    | Rfwd3         |
| chr9:56775895-56776395    | 55 | 0      | 32     | Sh3px3        |
| chr2:29107530-29108030    | 55 | 0      | -221   | mKIAA1857     |
| chr1:69903600-69904100    | 54 | 30075  | 30289  | Spag16        |
| chr1:57030355-57030855    | 54 | 260    | 1430   | AK046737      |
| chr15:97833620-97834120   | 54 | 1155   | 1205   | Col2a1        |
| chr7:29162920-29163420    | 54 | 220    | 1076   | Zfp36         |
| chr15:96118050-96118550   | 54 | 0      | 348    | 1700124K17Rik |
| chr4:148511115-148511615  | 54 | 27     | 293    | Apitd1        |
| chr2:122124615-122125115  | 54 | 21     | 230    | Duoxa2        |
| chr17:57129115-57129615   | 54 | 141    | -366   | Clpp          |
| chr7:37474380-37474880    | 54 | 5701   | -8506  | Tshz3         |
| chr5:149983900-149984400  | 53 | 11539  | 11488  | AK082086      |
| chr17:46159500-46160000   | 53 | 7584   | 5597   | Vegfa         |
| chr4:151552740-151553240  | 53 | 71     | 748    | Acot7         |
| chr3:87774980-87775480    | 53 | 0      | 216    | Nes           |
| chr15:99055325-99055825   | 53 | 281    | 169    | Kcnh3         |
| chr15:99860540-99861040   | 53 | 8178   | -8372  | AI317237      |
| chr19:4333930-4334430     | 53 | 28128  | -28226 | Adrbk1        |
| chr1:183674040-183674540  | 52 | 500000 | 3124   | A230079K17Rik |
| chr15:102752550-102753050 | 52 | 178    | 1239   | Hoxc13        |
| chr18:62071165-62071665   | 52 | 0      | 36     | Ablim3        |
| chr19:47089975-47090475   | 52 | 0      | -583   | Nt5c2         |
| chr8:87306530-87307030    | 52 | 1340   | -8513  | Nfix          |
| chr2:22444250-22444750    | 52 | 33197  | -33346 | Gad2          |
| chr18:82390320-82390820   | 51 | 500000 | 500000 |               |
| chr10:90319330-90319830   | 51 | 26934  | 26993  | Anks1b        |
| chr15:85496660-85497160   | 51 | 3852   | 20398  | AK041762      |
| chr11:104411150-104411650 | 51 | 0      | 533    | Cdc27         |
| chr8:79423955-79424455    | 51 | 0      | 314    | AK162930      |
| chr11:78074600-78075100   | 51 | 69     | -407   | 2610507B11Rik |
| chr18:13132070-13132570   | 50 | 16     | 1560   | Impact        |
| chrX:154035210-154035710  | 50 | 630    | 1186   | Mbtps2        |
| chr2:125331340-125331840  | 50 | 0      | 583    | Fbn1          |
| chr3:120965940-120966440  | 50 | 33     | 43     | Tmem56        |
| chr3:8245020-8245520      | 49 | 500000 | 500000 |               |
| chr3:12640260-12640760    | 49 | 500000 | 500000 |               |
| chr1:167166605-167167105  | 49 | 0      | 218    | Tipr1         |
| chr1:180459110-180459610  | 49 | 0      | 105    | D230039L06Rik |

|                           |    |        |        |                    |
|---------------------------|----|--------|--------|--------------------|
| chr16:70314090-70314590   | 49 | 0      | 9      | Gbe1               |
| chr5:120120150-120120650  | 49 | 0      | -277   | Tbx3               |
| chr2:113791960-113792460  | 49 | 46889  | -47092 | AK045885           |
| chr2:19192000-19192500    | 48 | 500000 | 500000 |                    |
| chr2:122507430-122507930  | 48 | 20259  | 20718  | Slc30a4            |
| chr12:81360265-81360765   | 48 | 0      | 787    | Actn1              |
| chr16:38902520-38903020   | 48 | 0      | 313    | Igsf11             |
| chr16:32247180-32247680   | 48 | 40     | 59     | Wdr53              |
| chr1:193933140-193933640  | 48 | 16758  | -16946 | Traf5              |
| chr4:130299890-130300390  | 48 | 48126  | -48311 | Sdc3               |
| chr9:60037290-60037790    | 48 | 500000 | -48599 | Thsd4              |
| chr5:148176005-148176505  | 47 | 35227  | 35809  | Flt3               |
| chr2:166731930-166732430  | 47 | 51     | 585    | Cse1l              |
| chr15:102162405-102162905 | 47 | 197    | 487    | Myg1               |
| chr15:79376440-79376940   | 47 | 0      | 480    | Ddx17              |
| chr9:71618710-71619210    | 47 | 80     | 448    | Cgn1               |
| chr6:114232760-114233260  | 47 | 0      | 243    | Slc6a1             |
| chr2:44965390-44965890    | 47 | 0      | 123    | Zeb2               |
| chr11:9018315-9018815     | 47 | 31838  | -64    | Upp1               |
| chr10:67000270-67000770   | 47 | 33     | -96    | Egr2               |
| chr4:154623650-154624150  | 47 | 2      | -188   | 2610002J02Rik      |
| chr10:98569305-98569805   | 47 | 0      | -249   | Wdr51b             |
| chr3:87805890-87806390    | 47 | 1749   | -1989  | Bcan               |
| chr17:36368000-36368500   | 47 | 0      | -17515 | AK138323           |
| chr17:5618800-5619300     | 46 | 500000 | 500000 |                    |
| chr1:188529220-188529720  | 46 | 0      | 397    | Tgfb2              |
| chr8:58773340-58773840    | 46 | 0      | 242    | Hpgd               |
| chr17:6106330-6106830     | 46 | 0      | 144    | AK163710           |
| chr13:76521950-76522450   | 46 | 0      | -208   | Mctp1              |
| chr1:177422700-177423200  | 46 | 103    | -430   | Rgs7               |
| chr15:99500130-99500630   | 46 | 309    | -768   | Accn2              |
| chr3:102906040-102906540  | 46 | 28     | -25188 | Dennd2c            |
| chr11:5081720-5082220     | 46 | 29409  | -29746 | Emid1              |
| chr4:146893080-146893580  | 46 | 500000 | -34085 | OTTMUSG00000010673 |
| chr9:3258615-3259115      | 45 | 500000 | 43552  | DQ722852           |
| chrX:109484270-109484770  | 45 | 500000 | 34910  | Sat1l              |
| chr3:60807275-60807775    | 45 | 204    | 809    | P2ry1              |
| chr5:9101155-9101655      | 45 | 0      | 669    | 4930420K17Rik      |
| chr6:113991110-113991610  | 45 | 298    | 659    | Atp2b2             |
| chr10:78995770-78996270   | 45 | 97     | 466    | Ppap2c             |
| chr8:122386190-122386690  | 45 | 52     | 236    | BC025816           |
| chr1:169279945-169280445  | 45 | 67     | 74     | Aldh9a1            |
| chr8:118230870-118231370  | 45 | 0      | -327   | Maf                |
| chr13:59833200-59833700   | 45 | 37224  | -338   | 4932411G14Rik      |
| chr13:58230570-58231070   | 45 | 0      | -2072  | AK019388           |
| chr7:138683810-138684310  | 45 | 1376   | -2416  | Hmx3               |

|                           |    |        |        |               |
|---------------------------|----|--------|--------|---------------|
| chrX:166430525-166431025  | 45 | 1162   | -5905  | AK019053      |
| chr10:82816490-82816990   | 45 | 6013   | -6257  | D10Wsu102e    |
| chr3:154086640-154087140  | 44 | 500000 | 500000 |               |
| chr16:21771050-21771550   | 44 | 22889  | 16568  | Ehhadh        |
| chr1:39633090-39633590    | 44 | 30     | 909    | Rnf149        |
| chr1:107887610-107888110  | 44 | 0      | 878    | Zcchc2        |
| chr15:99803800-99804300   | 44 | 0      | 840    | Larp4         |
| chr6:121134170-121134670  | 44 | 0      | 736    | Pex26         |
| chr3:104764775-104765275  | 44 | 0      | -399   | Wnt2b         |
| chr7:119822180-119822680  | 44 | 0      | -676   | Tead1         |
| chr10:61592685-61593185   | 44 | 2591   | -2902  | Neurog3       |
| chr15:12496530-12497030   | 44 | 500000 | -8669  | AK195788      |
| chr15:83443750-83444250   | 44 | 18303  | -18461 | Ttll12        |
| chr10:17690690-17691190   | 44 | 22854  | -23068 | Heca          |
| chr1:167667320-167667820  | 44 | 26266  | -26340 | Creg1         |
| chr1:192365770-192366270  | 43 | 500000 | 500000 |               |
| chr6:47601070-47601570    | 43 | 0      | 500000 |               |
| chr4:145147600-145148100  | 43 | 19143  | 39015  | BC086318      |
| chr19:7248100-7248600     | 43 | 7630   | 32423  | Otub1         |
| chr10:21862050-21862550   | 43 | 6038   | 6328   | AK053193      |
| chr1:26743675-26744175    | 43 | 500000 | 379    | 4931408C20Rik |
| chr10:79379800-79380300   | 43 | 122    | 335    | Kiss1r        |
| chr5:135027845-135028345  | 43 | 0      | 208    | Clip2         |
| chr8:97508360-97508860    | 43 | 500000 | 108    | Gpr56         |
| chr4:102791370-102791870  | 43 | 182    | -374   | Mier1         |
| chr15:88953745-88954245   | 43 | 345    | -479   | Tubgcp6       |
| chr15:74393170-74393670   | 43 | 917    | -582   | Bai1          |
| chr19:42459440-42459940   | 43 | 46191  | -20970 | AK077353      |
| chr15:32075560-32076060   | 43 | 500000 | -31233 | Tas2r119      |
| chr4:152327660-152328160  | 42 | 500000 | 500000 |               |
| chr14:108530030-108530530 | 42 | 500000 | 500000 |               |
| chr6:100513220-100513720  | 42 | 0      | 36077  | AK006738      |
| chr17:25385040-25385540   | 42 | 7557   | 7920   | Baiap3        |
| chr9:62190510-62191010    | 42 | 0      | 1080   | AK028224      |
| chr10:57206140-57206640   | 42 | 0      | 99     | Hsf2          |
| chr7:138553970-138554470  | 42 | 0      | 6      | Acadsb        |
| chr4:34011340-34011840    | 42 | 0      | -16    | Cnr1          |
| chr9:61220670-61221170    | 42 | 0      | -421   | Tle3          |
| chr8:47380470-47380970    | 42 | 469    | -696   | Helt          |
| chr11:74642910-74643410   | 42 | 241    | -1267  | Mnt           |
| chr15:28111580-28112080   | 42 | 500000 | -21690 | Dnahc5        |
| chr3:151574710-151575210  | 41 | 500000 | 500000 |               |
| chr7:89920070-89920570    | 41 | 500000 | 500000 |               |
| chr9:21216230-21216730    | 41 | 156    | 134    | Qtrt1         |
| chr19:56471340-56471840   | 41 | 0      | -28    | Casp7         |
| chr6:128493215-128493715  | 41 | 500000 | -52    | BC048546      |

|                           |    |        |        |               |
|---------------------------|----|--------|--------|---------------|
| chr9:107134200-107134700  | 41 | 0      | -211   | Dock3         |
| chr19:6427315-6427815     | 41 | 262    | -239   | Nrxn2         |
| chr15:77137360-77137860   | 41 | 0      | -253   | Rbm9          |
| chr6:32538320-32538820    | 41 | 348    | -379   | Ptxna4        |
| chr5:112823170-112823670  | 41 | 177    | -2188  | Asphd2        |
| chr11:55427690-55428190   | 41 | 500000 | -6649  | Gira1         |
| chr15:99861085-99861585   | 41 | 7633   | -7827  | AI317237      |
| chr3:8245605-8246105      | 40 | 500000 | 500000 |               |
| chr12:81480960-81481460   | 40 | 40143  | 500000 |               |
| chr9:49810550-49811050    | 40 | 500000 | 47818  | AK044673      |
| chr12:73475390-73475890   | 40 | 33612  | 34285  | Rtn1          |
| chr2:93797435-93797935    | 40 | 276    | 27260  | Alkbh3        |
| chr10:126953900-126954400 | 40 | 3899   | 2156   | Ndufa4l2      |
| chr5:148536615-148537115  | 40 | 0      | 698    | Flt1          |
| chr9:95307050-95307550    | 40 | 0      | 388    | Chst2         |
| chr11:75300450-75300950   | 40 | 0      | 379    | Prpf8         |
| chr6:52663780-52664280    | 40 | 0      | 289    | Tax1bp1       |
| chr3:88306840-88307340    | 40 | 0      | 138    | Lmna          |
| chr5:114581360-114581860  | 40 | 0      | -391   | Ung           |
| chr11:76811440-76811940   | 40 | 214    | -408   | Slc6a4        |
| chr14:57504705-57505205   | 40 | 0      | -534   | Zmym2         |
| chr2:48668785-48669285    | 40 | 181    | -641   | Acvr2a        |
| chr15:102528435-102528935 | 39 | 5030   | 23814  | Calcoco1      |
| chr4:134506340-134506840  | 39 | 19206  | 19696  | Syf2          |
| chr15:98409075-98409575   | 39 | 10662  | 7891   | 4930415O2ORik |
| chr7:149850100-149850600  | 39 | 58     | 4753   | NR_002855     |
| chr8:124255100-124255600  | 39 | 454    | 888    | Jph3          |
| chr11:105927880-105928380 | 39 | 404    | 710    | Ccdc44        |
| chr15:75921180-75921680   | 39 | 341    | 625    | Nrbp2         |
| chr11:120494180-120494680 | 39 | 0      | 430    | Mafg          |
| chr6:115626390-115626890  | 39 | 0      | 12     | Raf1          |
| chr2:155299640-155300140  | 39 | 40481  | -261   | Ncoa6         |
| chr11:95685060-95685560   | 39 | 1      | -503   | Phospho1      |
| chr3:88005160-88005660    | 39 | 201    | -5324  | AK141565      |
| chr4:145029650-145030150  | 39 | 23544  | -24212 | NR_002888     |
| chr5:103531760-103532260  | 39 | 500000 | -44600 | Mapk10        |
| chr2:181663680-181664180  | 38 | 500000 | 500000 |               |
| chr11:34495155-34495655   | 38 | 500000 | 500000 |               |
| chr12:84434535-84435035   | 38 | 500000 | 500000 |               |
| chr18:3006085-3006585     | 38 | 500000 | 500000 |               |
| chr15:59481350-59481850   | 38 | 435    | 1392   | Trib1         |
| chr4:9772060-9772560      | 38 | 391    | 792    | Gdf6          |
| chr17:67702905-67703405   | 38 | 0      | 571    | Ptprm         |
| chr3:108713850-108714350  | 38 | 0      | 521    | Prpf38b       |
| chr12:101203680-101204180 | 38 | 0      | 517    | Kcnk13        |
| chr9:119311720-119312220  | 38 | 0      | 352    | Acvr2b        |

|                           |    |        |        |               |
|---------------------------|----|--------|--------|---------------|
| chr11:95198400-95198900   | 38 | 0      | 319    | 5730593F17Rik |
| chr9:47338470-47338970    | 38 | 0      | 286    | Cadm1         |
| chr9:102256690-102257190  | 38 | 0      | 22     | Ephb1         |
| chr11:116351990-116352490 | 38 | 441    | -590   | Prpsap1       |
| chr4:118220600-118221100  | 38 | 6098   | -4518  | Tmem125       |
| chr10:127878740-127879240 | 38 | 16630  | -17359 | Smarcc2       |
| chr18:79306080-79306580   | 38 | 0      | -22653 | Setbp1        |
| chr8:126099255-126099755  | 37 | 29652  | 500000 |               |
| chr18:105033350-10503850  | 37 | 500000 | 500000 |               |
| chr17:88162380-88162880   | 37 | 16499  | 34703  | Kcnk12        |
| chr8:86145960-86146460    | 37 | 40     | 13759  | Dnajb1        |
| chr17:29246300-29246800   | 37 | 10943  | 11399  | Cdkn1a        |
| chr11:98188890-98189390   | 37 | 0      | 1818   | Neurod2       |
| chr11:117829180-117829680 | 37 | 0      | 1045   | Socs3         |
| chr9:108550540-108551040  | 37 | 231    | 920    | Arih2         |
| chr11:6964090-6964590     | 37 | 88     | 849    | Adcy1         |
| chr9:74919460-74919960    | 37 | 0      | 698    | Myo5a         |
| chr15:99501450-99501950   | 37 | 165    | 552    | Accn2         |
| chr2:109731160-109731660  | 37 | 0      | 376    | Lin7c         |
| chr15:81958455-81958955   | 37 | 0      | 354    | Ccdc134       |
| chr2:26358685-26359185    | 37 | 0      | 221    | Notch1        |
| chr8:64238430-64238930    | 37 | 0      | 205    | Palld         |
| chr11:76759190-76759690   | 37 | 0      | 181    | Blmh          |
| chr3:27610035-27610535    | 37 | 202    | -57    | Fndc3b        |
| chrX:166444750-166445250  | 37 | 8734   | -20130 | AK019053      |
| chr2:112667625-112668125  | 36 | 500000 | 500000 |               |
| chr17:48753350-48753850   | 36 | 500000 | 500000 |               |
| chr1:62753010-62753510    | 36 | 0      | 3370   | Nrp2          |
| chr14:101860170-101860670 | 36 | 500000 | 2019   | Tbc1d4        |
| chr15:37721320-37721820   | 36 | 0      | 591    | Ncald         |
| chr1:39534750-39535250    | 36 | 0      | 579    | Tbc1d8        |
| chr16:90934340-90934840   | 36 | 0      | 467    | 1110004E09Rik |
| chr10:41994870-41995370   | 36 | 0      | 283    | Foxo3a        |
| chr4:131830300-131830800  | 36 | 203    | 223    | Taf12         |
| chr12:114378700-114379200 | 36 | 0      | 193    | Crip2         |
| chr15:102033430-102033930 | 36 | 191    | -87    | Csad          |
| chr5:141180630-141181130  | 36 | 0      | -96    | AA881470      |
| chr6:122770090-122770590  | 36 | 8      | -188   | Foxj2         |
| chr9:60709495-60709995    | 36 | 500000 | -475   | Uaca          |
| chr16:9992890-9993390     | 36 | 571    | -515   | Grin2a        |
| chr2:179839610-179840110  | 36 | 375    | -934   | Hrh3          |
| chr2:19373680-19374180    | 36 | 5659   | -5630  | AK053418      |
| chr9:123782010-123782510  | 36 | 20980  | -11015 | Xcr1          |
| chr3:154084885-154085385  | 35 | 500000 | 500000 |               |
| chr4:8974365-8974865      | 35 | 500000 | 500000 |               |
| chr6:144393020-144393520  | 35 | 500000 | 500000 |               |



|                           |    |        |        |                    |
|---------------------------|----|--------|--------|--------------------|
| chr7:132072320-132072820  | 35 | 500000 | 500000 |                    |
| chr14:61253435-61253935   | 35 | 0      | 500000 |                    |
| chr17:13498725-13499225   | 35 | 500000 | 39692  | AK036897           |
| chr12:25419555-25420055   | 35 | 26238  | 26658  | Rrm2               |
| chr15:100557210-100557710 | 35 | 1959   | 2346   | Galnt6             |
| chr14:56382045-56382545   | 35 | 580    | 2031   | Ltb4r2             |
| chr19:56798125-56798625   | 35 | 0      | 1514   | Adrb1              |
| chr14:31529570-31530070   | 35 | 0      | 936    | Sfmbt1             |
| chr19:3685655-3686155     | 35 | 0      | 648    | Lrp5               |
| chr5:124991180-124991680  | 35 | 0      | 631    | Tmed2              |
| chr5:3802170-3802670      | 35 | 0      | 504    | Ankib1             |
| chr3:85775410-85775910    | 35 | 243    | 332    | SH3d19             |
| chr8:109207020-109207520  | 35 | 0      | 303    | Tmco7              |
| chr16:11202860-11203360   | 35 | 0      | 274    | Rsl1d1             |
| chr2:128524750-128525250  | 35 | 11766  | 268    | Mertk              |
| chr15:64753420-64753920   | 35 | 0      | 187    | Adcy8              |
| chr15:74502570-74503070   | 35 | 0      | 179    | Arc                |
| chr11:61575200-61575700   | 35 | 0      | 113    | Prpsap2            |
| chr9:68501370-68501870    | 35 | 0      | 12     | Rora               |
| chr9:105033875-105034375  | 35 | 0      | 9      | Nudt16             |
| chr11:60835290-60835790   | 35 | 167    | -525   | Kcnj12             |
| chr2:127952520-127953020  | 35 | 0      | -540   | Bcl2l11            |
| chr16:8738790-8739290     | 35 | 0      | -606   | Hausp              |
| chr1:39249820-39250320    | 35 | 193    | -986   | Npas2              |
| chr4:146024285-146024785  | 35 | 9950   | -10389 | OTTMUSG00000010105 |
| chr1:190766400-190766900  | 35 | 500000 | -14496 | Ush2a              |
| chr8:49102025-49102525    | 35 | 25598  | -26371 | Wwc2               |
| chr8:126124125-126124625  | 35 | 500000 | -30739 | AK086660           |
| chr9:22843550-22844050    | 34 | 500000 | 500000 |                    |
| chr12:84435095-84435595   | 34 | 500000 | 500000 |                    |
| chr16:3350880-3351380     | 34 | 500000 | 500000 |                    |
| chr3:84237970-84238470    | 34 | 45014  | 45192  | 6330505N24Rik      |
| chr8:90597500-90598000    | 34 | 44854  | 44755  | AK077166           |
| chr5:148034950-148035450  | 34 | 33355  | 34929  | Gsx1               |
| chr10:114894580-114895080 | 34 | 500000 | 30470  | Ccdc131            |
| chr8:97877010-97877510    | 34 | 0      | 1024   | Mmp15              |
| chr5:24031460-24031960    | 34 | 103    | 955    | Gbx1               |
| chr10:53098690-53099190   | 34 | 118    | 716    | AK039734           |
| chr4:63156225-63156725    | 34 | 0      | 509    | Whrn               |
| chr8:24085410-24085910    | 34 | 0      | 345    | Ank1               |
| chr8:87823770-87824270    | 34 | 9      | 331    | Orc6               |
| chr4:154596065-154596565  | 34 | 0      | 328    | Ski                |
| chr5:42234980-42235480    | 34 | 0      | 323    | A230054D04Rik      |
| chr17:48060970-48061470   | 34 | 0      | 171    | Foxp4              |
| chr6:137117825-137118325  | 34 | 0      | 144    | Rerg               |
| chr10:90633970-90634470   | 34 | 0      | 106    | Tmpo               |

|                           |    |        |        |          |
|---------------------------|----|--------|--------|----------|
| chr8:89109480-89109980    | 34 | 38253  | -5146  | Abcc12   |
| chr2:90235060-90235560    | 34 | 500000 | -5509  | Olfr1274 |
| chr2:127664300-127664800  | 34 | 6824   | -7018  | Bub1     |
| chr8:19924570-19925070    | 34 | 31640  | -7950  | AK166824 |
| chr17:23836125-23836625   | 34 | 374    | -15391 | Cldn9    |
| chr2:16604490-16604990    | 33 | 500000 | 500000 |          |
| chr5:126278460-126278960  | 33 | 500000 | 500000 |          |
| chr15:98886215-98886715   | 33 | 233    | 828    | Prph     |
| chr15:87375290-87375790   | 33 | 0      | 812    | AW049604 |
| chr11:3190740-3191240     | 33 | 0      | 531    | Patz1    |
| chr11:20101860-20102360   | 33 | 187    | 506    | Rab1     |
| chrX:96331665-96332165    | 33 | 0      | 447    | Efnb1    |
| chr6:7642495-7642995      | 33 | 237    | 436    | Asns     |
| chr18:10706040-10706540   | 33 | 0      | 403    | Abhd3    |
| chr10:83185790-83186290   | 33 | 67     | 398    | AK005183 |
| chr9:98856160-98856660    | 33 | 0      | 331    | Foxl2    |
| chr11:53520315-53520815   | 33 | 0      | 255    | Rad50    |
| chr1:121733150-121733650  | 33 | 0      | 247    | Ptpn4    |
| chr19:47089295-47089795   | 33 | 0      | 97     | Nt5c2    |
| chr2:120803120-120803620  | 33 | 0      | 4      | Tmem62   |
| chr11:115375440-115375940 | 33 | 0      | -7     | Hn1      |
| chr2:130109935-130110435  | 33 | 0      | -23    | Idh3b    |
| chr10:8238440-8238940     | 33 | 107    | -68    | Ust      |
| chr4:45543140-45543640    | 33 | 0      | -189   | Shb      |
| chr6:91633500-91634000    | 33 | 375    | -338   | Slc6a6   |
| chr8:24084010-24084510    | 33 | 644    | -1055  | Ank1     |
| chr14:35631920-35632420   | 33 | 81     | -1151  | Grid1    |
| chr11:94545370-94545870   | 33 | 6726   | -6847  | Xylt2    |
| chr18:13107580-13108080   | 33 | 7365   | -7602  | Osbpl1a  |
| chr15:12802830-12803330   | 33 | 47978  | -11662 | Rn3      |
| chr19:55239710-55240210   | 33 | 500000 | -15414 | Tectb    |
| chr11:67446605-67447105   | 33 | 500000 | -19223 | Gas7     |
| chr2:181665705-181666205  | 32 | 500000 | 500000 |          |
| chr19:58461120-58461620   | 32 | 500000 | 500000 |          |
| chrX:99073740-99074240    | 32 | 28150  | 29267  | AK142977 |
| chr6:29698655-29699155    | 32 | 12365  | 13403  | Smo      |
| chr10:57686520-57687020   | 32 | 31322  | 8652   | Dux      |
| chr7:4422900-4423400      | 32 | 29526  | 6700   | Eps8l1   |
| chr2:125973405-125973905  | 32 | 4003   | 4064   | AK015893 |
| chr9:30750770-30751270    | 32 | 91     | 873    | Adamts8  |
| chr10:62800710-62801210   | 32 | 0      | 804    | Sirt1    |
| chr17:43153830-43154330   | 32 | 0      | 577    | Tnfrsf21 |
| chr3:127539610-127540110  | 32 | 128    | 549    | BC002199 |
| chr10:17443480-17443980   | 32 | 0      | 504    | Cited2   |
| chr1:129101790-129102290  | 32 | 0      | 478    | Mgat5    |
| chr9:77602770-77603270    | 32 | 0      | 404    | Gclc     |

|                           |    |        |        |               |
|---------------------------|----|--------|--------|---------------|
| chr4:117587175-117587675  | 32 | 0      | 178    | Ipo13         |
| chr19:6334980-6335480     | 32 | 0      | 177    | Men1          |
| chr17:69733210-69733710   | 32 | 0      | 143    | Zfp161        |
| chr5:92512440-92512940    | 32 | 0      | 70     | G3bp2         |
| chr11:4034705-4035205     | 32 | 271    | -207   | Rnf215        |
| chr8:59029430-59029930    | 32 | 0      | -250   | Fbxo8         |
| chr11:59119790-59120290   | 32 | 0      | -391   | Wnt9a         |
| chr15:102805940-102806440 | 32 | 5891   | -1272  | Hoxc9         |
| chr1:173470450-173470950  | 32 | 36369  | -5277  | Itln1         |
| chrX:166438760-166439260  | 32 | 2744   | -14140 | AK019053      |
| chr8:126124725-126125225  | 32 | 500000 | -30139 | AK086660      |
| chr17:30861050-30861550   | 31 | 500000 | 500000 |               |
| chr17:30883575-30884075   | 31 | 500000 | 500000 |               |
| chr17:48872680-48873180   | 31 | 500000 | 500000 |               |
| chr4:146973270-146973770  | 31 | 500000 | 16017  | 2610305D13Rik |
| chr19:6428900-6429400     | 31 | 159    | 1346   | Nrxn2         |
| chr1:88424290-88424790    | 31 | 0      | 1230   | Ptma          |
| chr9:95306260-95306760    | 31 | 0      | 1178   | Chst2         |
| chr9:87624765-87625265    | 31 | 0      | 1079   | Tbx18         |
| chr15:27954275-27954775   | 31 | 0      | 1077   | Trio          |
| chr10:42893210-42893710   | 31 | 0      | 875    | Sobp          |
| chr17:71350860-71351360   | 31 | 0      | 762    | 2900073G15Rik |
| chr11:60836505-60837005   | 31 | 0      | 690    | Kcnj12        |
| chr10:93104300-93104800   | 31 | 279    | 605    | Ntn4          |
| chr4:148961005-148961505  | 31 | 0      | 509    | Clstn1        |
| chr5:110536160-110536660  | 31 | 0      | 475    | Gtpbp6        |
| chr8:120807860-120808360  | 31 | 0      | 456    | Cdh13         |
| chr10:110602020-110602520 | 31 | 0      | 413    | Osbp18        |
| chr4:144836165-144836665  | 31 | 0      | 357    | Tnfrsf1b      |
| chr15:81416450-81416950   | 31 | 0      | 57     | Ep300         |
| chr3:146515121-146515621  | 31 | 39042  | 0      | 4921517B04Rik |
| chr8:37520950-37521450    | 31 | 0      | -11    | mKIAA1456     |
| chr11:98656470-98656970   | 31 | 0      | -109   | 4121402D02Rik |
| chr1:134087570-134088070  | 31 | 88     | -187   | Lemd1         |
| chr3:130814960-130815460  | 31 | 0      | -203   | BC051212      |
| chr1:181890330-181890830  | 31 | 0      | -310   | Cdc42bpa      |
| chr15:87374005-87374505   | 31 | 189    | -473   | AW049604      |
| chr9:119488685-119489185  | 31 | 469    | -802   | Scn5a         |
| chr8:126148290-126148790  | 31 | 29019  | -6574  | AK086660      |
| chr13:38095780-38096280   | 31 | 9840   | -10005 | Ssr1          |
| chr3:28137560-28138060    | 31 | 23651  | -24325 | AK039113      |
| chr10:89335220-89335720   | 30 | 293    | 500000 |               |
| chr15:85494820-85495320   | 30 | 3545   | 18558  | AK041762      |
| chr5:72680485-72680985    | 30 | 500000 | 9453   | Atp10d        |
| chr1:61692510-61693010    | 30 | 6780   | 6944   | Pard3b        |
| chr2:122457215-122457715  | 30 | 0      | 1104   | Spata5l1      |

|                           |    |        |        |                    |
|---------------------------|----|--------|--------|--------------------|
| chr10:84219625-84220125   | 30 | 1861   | 1083   | Rfx4               |
| chr15:74395005-74395505   | 30 | 658    | 1034   | Bai1               |
| chr8:123261050-123261550  | 30 | 916    | 1025   | Irf8               |
| chr7:117103010-117103510  | 30 | 154    | 675    | Rab6ip1            |
| chr4:137418410-137418910  | 30 | 131    | 449    | Ece1               |
| chr10:120802345-120802845 | 30 | 0      | 445    | AK081796           |
| chr4:132195120-132195620  | 30 | 108    | 410    | Eya3               |
| chr5:31357310-31357810    | 30 | 0      | 377    | Cad                |
| chr4:129012120-129012620  | 30 | 0      | 243    | Rbbp4              |
| chr17:3082110-3082610     | 30 | 1965   | 211    | AK185737           |
| chr9:34296190-34296690    | 30 | 14     | 152    | Kirrel3            |
| chr10:10277635-10278135   | 30 | 0      | 119    | Rab32              |
| chr1:9737485-9737985      | 30 | 0      | 7      | AK006607           |
| chr3:143865340-143865840  | 30 | 184    | -295   | Lmo4               |
| chr17:56145050-56145550   | 30 | 3193   | -310   | Stap2              |
| chr11:7114175-7114675     | 30 | 312    | -500   | Igfbp3             |
| chr5:24033120-24033620    | 30 | 283    | -705   | Gbx1               |
| chr5:120955060-120955560  | 30 | 1582   | -1684  | 1300012G16Rik      |
| chrX:96328075-96328575    | 30 | 3125   | -3143  | Efnb1              |
| chr11:114942410-114942910 | 30 | 10104  | -10084 | Rab37              |
| chr2:118317260-118317760  | 30 | 11934  | -12079 | Srp14              |
| chr8:126142770-126143270  | 30 | 34539  | -12094 | AK086660           |
| chr11:6636970-6637470     | 30 | 500000 | -17181 | AK076664           |
| chrX:166442220-166442720  | 30 | 6204   | -17600 | AK019053           |
| chr12:106674140-106674640 | 30 | 500000 | -17675 | AK081193           |
| chr4:146902240-146902740  | 30 | 500000 | -24925 | OTTMUSG00000010673 |
| chr15:79298065-79298565   | 30 | 17439  | -25879 | Csnk1e             |
| chr9:96559060-96559560    | 30 | 27317  | -27356 | gap1m              |
| chr14:26619700-26620200   | 30 | 31090  | -41705 | Anxa11             |
| chr3:78707805-78708305    | 29 | 500000 | 500000 |                    |
| chr11:8461910-8462410     | 29 | 500000 | 500000 |                    |
| chr5:33071400-33071900    | 29 | 500000 | 13231  | Pisd               |
| chr15:85488410-85488910   | 29 | 2531   | 12148  | AK041762           |
| chr5:114626030-114626530  | 29 | 44633  | 10754  | Acacb              |
| chr17:56641870-56642370   | 29 | 8601   | 9785   | Znrf4              |
| chr16:91270790-91271290   | 29 | 0      | 1027   | Olig1              |
| chr14:117324890-117325390 | 29 | 0      | 604    | Gpc6               |
| chr3:120965030-120965530  | 29 | 145    | 526    | Tmem56             |
| chr7:36119610-36120110    | 29 | 0      | 518    | Rhpn2              |
| chr5:53133060-53133560    | 29 | 76     | 498    | Pi4k2b             |
| chr5:20560870-20561370    | 29 | 0      | 494    | Ptpn12             |
| chr2:181405730-181406230  | 29 | 0      | 364    | Sox18              |
| chr6:85402070-85402570    | 29 | 42     | 254    | Cct7               |
| chr13:114408270-114408770 | 29 | 0      | 245    | Snag1              |
| chr15:101097260-101097760 | 29 | 4      | 218    | Nr4a1              |
| chr5:64359680-64360180    | 29 | 0      | 205    | Rel1               |

|                           |    |        |        |               |
|---------------------------|----|--------|--------|---------------|
| chr6:134742200-134742700  | 29 | 0      | 195    | Dusp16        |
| chr2:130985380-130985880  | 29 | 34     | 125    | 1700037H04Rik |
| chr9:58336155-58336655    | 29 | 0      | -4     | 6030419C18Rik |
| chr6:38304460-38304960    | 29 | 0      | -108   | Zc3hav1       |
| chr11:60033970-60034470   | 29 | 79     | -115   | Srebf1        |
| chr8:12395755-12396255    | 29 | 0      | -347   | Sox1          |
| chr6:113992135-113992635  | 29 | 461    | -366   | PMCA2         |
| chr5:116182505-116183005  | 29 | 0      | -1188  | Ccdc64        |
| chr17:15055600-15056100   | 29 | 24088  | -9327  | Wdr27         |
| chr9:75279045-75279545    | 29 | 9826   | -10035 | Leo1          |
| chr4:3010650-3011150      | 28 | 500000 | 500000 |               |
| chr15:86490950-86491450   | 28 | 500000 | 500000 |               |
| chr14:63028010-63028510   | 28 | 500000 | 46865  | Gucy1b2       |
| chr7:51871460-51871960    | 28 | 24532  | 25455  | Kcnc3         |
| chr1:107700860-107701360  | 28 | 500000 | 23811  | Tnfrsf11a     |
| chr8:9957220-9957720      | 28 | 18650  | 18852  | Lig4          |
| chr3:129016580-129017080  | 28 | 500000 | 18836  | Enpep         |
| chr15:83726200-83726700   | 28 | 500000 | 5319   | mKIAA1672     |
| chr15:78675690-78676190   | 28 | 1981   | 2864   | Cdc42ep1      |
| chrX:7499480-7499980      | 28 | 0      | 2783   | Pcsk1n        |
| chr7:51037520-51038020    | 28 | 14962  | 1347   | Klk10         |
| chr4:148179420-148179920  | 28 | 0      | 1170   | Casz1         |
| chr1:179373410-179373910  | 28 | 754    | 1123   | Zfp238        |
| chr13:31651065-31651565   | 28 | 0      | 1010   | Foxq1         |
| chr8:94324015-94324515    | 28 | 0      | 1007   | Irx3          |
| chr8:23970680-23971180    | 28 | 0      | 920    | Myst3         |
| chr5:21849465-21849965    | 28 | 156    | 807    | Reln          |
| chr11:115127600-115128100 | 28 | 71     | 706    | Grin2c        |
| chr7:4452485-4452985      | 28 | 0      | 546    | Ppp1r12c      |
| chr8:86534595-86535095    | 28 | 187    | 495    | AK008705      |
| chr9:44127630-44128130    | 28 | 0      | 484    | Tmem24        |
| chr3:32716700-32717200    | 28 | 69     | 403    | Usp13         |
| chrX:8469660-8470160      | 28 | 0      | 403    | B630019K06Rik |
| chr17:71947440-71947940   | 28 | 0      | 395    | AK045842      |
| chr17:3115150-3115650     | 28 | 0      | 295    | Rbm16         |
| chr17:45692635-45693135   | 28 | 0      | 221    | Nfkbie        |
| chr4:59594380-59594880    | 28 | 0      | 168    | Hsd12         |
| chr14:55304780-55305280   | 28 | 36     | -22    | 1700123O20Rik |
| chr3:85691440-85691940    | 28 | 0      | -376   | Glt28d2       |
| chr5:109122630-109123130  | 28 | 83     | -640   | Fgfr11        |
| chr3:31106690-31107190    | 27 | 1046   | 500000 |               |
| chr8:35287720-35288220    | 27 | 500000 | 500000 |               |
| chr8:94598190-94598690    | 27 | 500000 | 500000 |               |
| chr16:45352975-45353475   | 27 | 500000 | 500000 |               |
| chrX:14316910-14317410    | 27 | 500000 | 500000 |               |
| chr6:30124235-30124735    | 27 | 58     | 37915  | DQ708924      |

|                           |    |        |        |               |
|---------------------------|----|--------|--------|---------------|
| chr18:10846780-10847280   | 27 | 500000 | 33051  | AK079855      |
| chr8:81749510-81750010    | 27 | 500000 | 22708  | 1700011L22Rik |
| chr4:8640000-8640500      | 27 | 20866  | 21739  | Chd7          |
| chr8:126060110-126060610  | 27 | 9241   | 17626  | Gas8          |
| chr8:128285335-128285835  | 27 | 27172  | 12442  | Pcnxl2        |
| chr3:36109360-36109860    | 27 | 500000 | 11586  | Gpr103        |
| chr12:81857890-81858390   | 27 | 261    | 3533   | Gm1568        |
| chr10:79958680-79959180   | 27 | 4      | 1280   | Onecut3       |
| chr5:128096495-128096995  | 27 | 301    | 1016   | Slc15a4       |
| chr1:168932360-168932860  | 27 | 616    | 1005   | C030014K22Rik |
| chr11:59103140-59103640   | 27 | 0      | 863    | Wnt3a         |
| chr9:62995810-62996310    | 27 | 416    | 707    | Lbxcor1       |
| chr4:136833945-136834445  | 27 | 154    | 646    | Wnt4          |
| chr3:35653415-35653915    | 27 | 22     | 606    | Atp11b        |
| chr3:7503650-7504150      | 27 | 155    | 475    | 3110050N22Rik |
| chr10:84647080-84647580   | 27 | 0      | 468    | Cry1          |
| chr1:93147280-93147780    | 27 | 100    | 388    | Ube2f         |
| chr5:116180940-116181440  | 27 | 0      | 377    | Ccdc64        |
| chr15:84685925-84686425   | 27 | 0      | 303    | Phf21b        |
| chr10:43299020-43299520   | 27 | 0      | 296    | Cd24a         |
| chr1:167693930-167694430  | 27 | 0      | 270    | Creg1         |
| chr5:35620980-35621480    | 27 | 248    | 16     | Adra2c        |
| chr3:145421410-145421910  | 27 | 0      | -30    | Ddah1         |
| chr7:146374210-146374710  | 27 | 0      | -89    | Stk32c        |
| chr15:72376550-72377050   | 27 | 0      | -92    | Kcnk9         |
| chr17:88373830-88374330   | 27 | 0      | -343   | Msh6          |
| chr10:128241995-128242495 | 27 | 0      | -390   | Dnajc14       |
| chr19:4626140-4626640     | 27 | 266    | -774   | Face-2        |
| chr10:41196990-41197490   | 27 | 12611  | -973   | Mical1        |
| chrX:148603060-148603560  | 27 | 23640  | -10241 | Iqsec2        |
| chr13:38097120-38097620   | 27 | 11180  | -11345 | Ssr1          |
| chr17:43742370-43742870   | 27 | 24048  | -13240 | AK006933      |
| chr12:85082845-85083345   | 27 | 29597  | -21515 | Papln         |
| chr4:126675350-126675850  | 27 | 22955  | -22978 | Sfpq          |
| chr11:61221330-61221830   | 27 | 0      | -30015 | RP23-451A6    |
| chr2:22445560-22446060    | 27 | 31887  | -32036 | Gad2          |
| chr10:9907100-9907600     | 27 | 500000 | -47441 | AK016412      |
| chr1:77714540-77715040    | 26 | 500000 | 500000 |               |
| chr4:79650410-79650910    | 26 | 500000 | 500000 |               |
| chr4:80901350-80901850    | 26 | 500000 | 500000 |               |
| chr4:150818610-150819110  | 26 | 41083  | 500000 |               |
| chr5:117250785-117251285  | 26 | 500000 | 500000 |               |
| chr5:151643020-151643520  | 26 | 500000 | 500000 |               |
| chr9:100296070-100296570  | 26 | 500000 | 500000 |               |
| chr11:8462855-8463355     | 26 | 500000 | 500000 |               |
| chr12:12595550-12596050   | 26 | 500000 | 500000 |               |

|                           |    |        |        |           |
|---------------------------|----|--------|--------|-----------|
| chr17:5625260-5625760     | 26 | 500000 | 500000 |           |
| chrX:166584175-166584675  | 26 | 500000 | 500000 |           |
| chr10:24842900-24843400   | 26 | 500000 | 47889  | AK076839  |
| chr7:75142380-75142880    | 26 | 44363  | 45488  | Igf1r     |
| chr10:61867895-61868395   | 26 | 44031  | 17059  | Hkdc1     |
| chr10:60148710-60149210   | 26 | 0      | 10277  | Cdh23     |
| chr16:17832835-17833335   | 26 | 457    | 5193   | Car15     |
| chr1:173494200-173494700  | 26 | 500000 | 5127   | Cd244     |
| chr6:56322580-56323080    | 26 | 500000 | 3132   | AK076685  |
| chr11:107774580-107775080 | 26 | 500000 | 1538   | Cacng5    |
| chr6:17644630-17645130    | 26 | 0      | 1475   | St7       |
| chr11:72019710-72020210   | 26 | 254    | 972    | mKIAA0753 |
| chr5:123349245-123349745  | 26 | 8      | 863    | Fbxl10    |
| chr1:181732710-181733210  | 26 | 97     | 830    | Ahctf1    |
| chr6:86145975-86146475    | 26 | 298    | 816    | Tgfa      |
| chr9:60710565-60711065    | 26 | 500000 | 595    | Uaca      |
| chr15:85407660-85408160   | 26 | 0      | 589    | Wnt7b     |
| chr11:115024990-115025490 | 26 | 0      | 586    | Slc9a3r1  |
| chr4:107107640-107108140  | 26 | 0      | 567    | Glis1     |
| chr9:83698940-83699440    | 26 | 185    | 516    | Elovl4    |
| chr11:101031850-101032350 | 26 | 0      | 515    | Plekhh3   |
| chr8:108693070-108693570  | 26 | 253    | 500    | Slc7a6    |
| chr1:16096210-16096710    | 26 | 88     | 498    | Rdh10     |
| chr2:131970095-131970595  | 26 | 0      | 498    | Slc23a2   |
| chr12:73336975-73337475   | 26 | 229    | 485    | Rtn1      |
| chr10:127814390-127814890 | 26 | 44     | 461    | Ankrd52   |
| chr4:132324440-132324940  | 26 | 0      | 416    | Rpa2      |
| chr13:14047085-14047585   | 26 | 0      | 395    | B3galnt2  |
| chr13:55546940-55547440   | 26 | 55     | 369    | Grk6      |
| chr10:61595795-61596295   | 26 | 251    | 208    | Neurog3   |
| chr5:123794395-123794895  | 26 | 0      | 103    | Bcl7a     |
| chr1:145586170-145586670  | 26 | 97     | -58    | Glrx2     |
| chr15:81688580-81689080   | 26 | 0      | -75    | Tob2      |
| chr8:74405600-74406100    | 26 | 47     | -116   | Zfp709    |
| chr19:30104530-30105030   | 26 | 0      | -222   | Uhrf2     |
| chr8:19984445-19984945    | 26 | 35094  | -321   | AK081879  |
| chr1:13364255-13364755    | 26 | 0      | -342   | Ncoa2     |
| chr15:39775435-39775935   | 26 | 0      | -383   | Lrp12     |
| chr8:70586430-70586930    | 26 | 84     | -496   | Psd3      |
| chr7:130513695-130514195  | 26 | 0      | -548   | mNadrin1  |
| chr16:17069465-17069965   | 26 | 527    | -688   | Ypel1     |
| chr18:23198125-23198625   | 26 | 0      | -1219  | Nol4      |
| chr2:179798330-179798830  | 26 | 6646   | -6717  | Gtpbp5    |
| chr2:77128210-77128710    | 26 | 9490   | -9812  | Sestd1    |
| chrX:166434890-166435390  | 26 | 0      | -10270 | AK019053  |
| chrX:11667400-11667900    | 26 | 0      | -10471 | Bcor      |

|                           |    |        |        |               |
|---------------------------|----|--------|--------|---------------|
| chr4:145038610-145039110  | 26 | 14584  | -15252 | NR_002888     |
| chr4:146797770-146798270  | 26 | 16364  | -24233 | AK019745      |
| chr2:168632820-168633320  | 26 | 40439  | -40370 | Sall4         |
| chr1:91147525-91148025    | 25 | 500000 | 500000 |               |
| chr6:47596920-47597420    | 25 | 4010   | 500000 |               |
| chr6:119057770-119058270  | 25 | 0      | 500000 |               |
| chr15:66948270-66948770   | 25 | 500000 | 500000 |               |
| chr16:34440660-34441160   | 25 | 500000 | 500000 |               |
| chr16:93469670-93470170   | 25 | 19904  | 500000 |               |
| chr17:11105150-11105650   | 25 | 500000 | 500000 |               |
| chr18:72913780-72914280   | 25 | 500000 | 500000 |               |
| chr19:58000825-58001325   | 25 | 500000 | 500000 |               |
| chr17:89155570-89156070   | 25 | 500000 | 35495  | Lhcgr         |
| chr16:98244050-98244550   | 25 | 500000 | 25812  | BC056174      |
| chr4:134505610-134506110  | 25 | 18476  | 18966  | Syf2          |
| chr10:80446050-80446550   | 25 | 2156   | 17809  | Gng7          |
| chr2:6287420-6287920      | 25 | 43080  | 13889  | Usp6nl        |
| chr15:82043310-82043810   | 25 | 171    | 11205  | Tnfrsf13c     |
| chr16:18137810-18138310   | 25 | 9697   | 10262  | Rtn4r         |
| chr17:72945395-72945895   | 25 | 7135   | 8001   | Alk           |
| chr7:107860795-107861295  | 25 | 5474   | 5830   | B930006L02Rik |
| chr5:35622700-35623200    | 25 | 0      | 1736   | Adra2c        |
| chr17:13745600-13746100   | 25 | 500000 | 1107   | BC068229      |
| chr2:180510360-180510860  | 25 | 142    | 994    | Bhlhb4        |
| chr15:43001260-43001760   | 25 | 274    | 853    | Rspo2         |
| chr11:50417310-50417810   | 25 | 521    | 822    | Adamts2       |
| chr2:32007050-32007550    | 25 | 136    | 624    | mKIAA0515     |
| chr6:113574340-113574840  | 25 | 51     | 576    | Vhlh          |
| chr15:85167090-85167590   | 25 | 12     | 530    | Atxn10        |
| chr3:152009680-152010180  | 25 | 0      | 486    | Usp33         |
| chr16:4559040-4559540     | 25 | 0      | 429    | Tcfap4        |
| chr9:56842950-56843450    | 25 | 0      | 426    | Ptpn9         |
| chr9:48643430-48643930    | 25 | 0      | 369    | Zbtb16        |
| chr9:69988760-69989260    | 25 | 0      | 353    | 6430514L14Rik |
| chr5:31350430-31350930    | 25 | 0      | 254    | Slc5a6        |
| chr2:164312230-164312730  | 25 | 0      | 104    | Dbnnd2        |
| chr17:63230330-63230830   | 25 | 0      | 85     | Efna5         |
| chr17:35804210-35804710   | 25 | 0      | 76     | Vars2         |
| chr15:100299320-100299820 | 25 | 0      | 46     | Letmd1        |
| chrX:133654760-133655260  | 25 | 1190   | -146   | Esx1          |
| chr14:76814360-76814860   | 25 | 0      | -157   | mKIAA1994     |
| chr7:52409180-52409680    | 25 | 0      | -242   | Pih1d1        |
| chr10:7675950-7676450     | 25 | 0      | -280   | Map3k7ip2     |
| chr3:127202080-127202580  | 25 | 139    | -298   | Ank2          |
| chr1:59820690-59821190    | 25 | 0      | -540   | Bmpr2         |
| chr5:15185580-15186080    | 25 | 500000 | -697   | NR_001585     |



|                           |    |        |        |               |
|---------------------------|----|--------|--------|---------------|
| chr13:46061070-46061570   | 25 | 0      | -976   | Atxn1         |
| chr5:112823950-112824450  | 25 | 149    | -2968  | Asphd2        |
| chr11:114949475-114949975 | 25 | 3039   | -3019  | Rab37         |
| chr4:148909770-148910270  | 25 | 17327  | -9205  | Ctnnbip1      |
| chr16:91534665-91535165   | 25 | 12237  | -12423 | Ifngr2        |
| chr3:40405700-40406200    | 25 | 24481  | -24257 | Pdzd6         |
| chr18:33411970-33412470   | 25 | 38455  | -38751 | Stard4        |
| chr2:28848985-28849485    | 24 | 500000 | 500000 |               |
| chr2:160076425-160076925  | 24 | 500000 | 500000 |               |
| chr4:53335640-53336140    | 24 | 500000 | 500000 |               |
| chr7:140387280-140387780  | 24 | 500000 | 500000 |               |
| chr12:98299705-98300205   | 24 | 500000 | 500000 |               |
| chr13:111251080-111251580 | 24 | 500000 | 500000 |               |
| chr14:48959020-48959520   | 24 | 500000 | 500000 |               |
| chr15:7295450-7295950     | 24 | 500000 | 500000 |               |
| chr16:96785655-96786155   | 24 | 500000 | 500000 |               |
| chrX:11583705-11584205    | 24 | 0      | 500000 |               |
| chr14:34063370-34063870   | 24 | 500000 | 33612  | Arhgap22      |
| chr10:90321120-90321620   | 24 | 28724  | 28783  | Anks1b        |
| chr9:70331280-70331780    | 24 | 19343  | 19630  | Rnf111        |
| chr17:29248130-29248630   | 24 | 12773  | 13229  | Cdkn1a        |
| chr12:50501760-50502260   | 24 | 270    | 10365  | AK043991      |
| chr8:12662875-12663375    | 24 | 8647   | 8974   | Tubgcp3       |
| chr4:145743250-145743750  | 24 | 20213  | 5508   | LOC433791     |
| chr5:122968760-122969260  | 24 | 16253  | 4982   | AK006664      |
| chr1:90137620-90138120    | 24 | 35496  | 3188   | AK133186      |
| chr5:140386040-140386540  | 24 | 1068   | 2394   | A930017N06Rik |
| chr11:63734300-63734800   | 24 | 0      | 1235   | Hs3st3b1      |
| chr5:14515690-14516190    | 24 | 388    | 1023   | Pclo          |
| chr4:154734340-154734840  | 24 | 496    | 909    | Prkcz         |
| chr14:48741195-48741695   | 24 | 46     | 902    | Peli2         |
| chr19:6117500-6118000     | 24 | 108    | 835    | Sac3d1        |
| chr8:11728740-11729240    | 24 | 155    | 822    | Arhgef7       |
| chr8:109460150-109460650  | 24 | 0      | 751    | Sntb2         |
| chr9:51975680-51976180    | 24 | 59     | 746    | mKIAA1726     |
| chr1:36995430-36995930    | 24 | 6      | 691    | Tmem131       |
| chr16:26104950-26105450   | 24 | 74     | 669    | Leprel1       |
| chr10:25080075-25080575   | 24 | 0      | 664    | Epb4          |
| chr8:89408245-89408745    | 24 | 3      | 643    | BC004022      |
| chr16:75593500-75594000   | 24 | 306    | 615    | Rbm11         |
| chr2:158436830-158437330  | 24 | 0      | 587    | Slc32a1       |
| chr13:74147260-74147760   | 24 | 0      | 585    | Tppp          |
| chr8:8659970-8660470      | 24 | 0      | 552    | Efnb2         |
| chr11:32121435-32121935   | 24 | 0      | 552    | Rhbf1         |
| chr15:76779215-76779715   | 24 | 38     | 492    | 1110038F14Rik |
| chr6:94233175-94233675    | 24 | 0      | 472    | Magi1         |

|                           |    |        |        |                    |
|---------------------------|----|--------|--------|--------------------|
| chr7:140829560-140830060  | 24 | 0      | 422    | 2700050L05Rik      |
| chr10:77875120-77875620   | 24 | 4      | 417    | Rrp1               |
| chr11:4087000-4087500     | 24 | 45     | 415    | Tbc1d10a           |
| chr5:110714525-110715025  | 24 | 182    | 411    | Pxmp2              |
| chr4:137951810-137952310  | 24 | 0      | 382    | LOC625638          |
| chr12:87087610-87088110   | 24 | 160    | 372    | Flvcr2             |
| chr11:100258440-100258940 | 24 | 0      | 362    | Jup                |
| chrX:33868455-33868955    | 24 | 0      | 302    | Lonrf3             |
| chr7:28459670-28460170    | 24 | 261    | 241    | C030039L03Rik      |
| chr12:117316225-117316725 | 24 | 22     | 210    | Vipr2              |
| chr17:35119030-35119530   | 24 | 0      | 177    | SmX5               |
| chr2:71205200-71205700    | 24 | 125    | 160    | Slc25a12           |
| chr3:156224340-156224840  | 24 | 0      | 119    | AK016265           |
| chr16:56717120-56717620   | 24 | 0      | 96     | Tfg                |
| chr8:63111510-63112010    | 24 | 0      | 85     | Mfap3l             |
| chr3:108829870-108830370  | 24 | 0      | 70     | Fam102b            |
| chr2:144993665-144994165  | 24 | 0      | 67     | Slc24a3            |
| chr12:29334320-29334820   | 24 | 0      | 58     | Rnh1               |
| chr5:104183390-104183890  | 24 | 39     | 49     | Aff1               |
| chr7:87439180-87439680    | 24 | 0      | 28     | Prc1               |
| chr7:105508445-105508945  | 24 | 616    | -107   | Tsku               |
| chr1:36614260-36614760    | 24 | 0      | -109   | Sema4c             |
| chr3:27081560-27082060    | 24 | 0      | -115   | Aadacl1            |
| chr17:51972430-51972930   | 24 | 111    | -156   | Satb1              |
| chr16:33056790-33057290   | 24 | 0      | -181   | Rpl35a             |
| chr2:170321400-170321900  | 24 | 0      | -277   | Pfdn4              |
| chr13:60278780-60279280   | 24 | 78     | -305   | Gas1               |
| chr11:88017300-88017800   | 24 | 112    | -369   | Mrps23             |
| chr19:53404300-53404800   | 24 | 27     | -385   | Mxi1               |
| chr9:72379370-72379870    | 24 | 0      | -426   | Rfxdc2             |
| chr13:112280310-112280810 | 24 | 0      | -514   | Gbbp1              |
| chr9:58335550-58336050    | 24 | 0      | -609   | 6030419C18Rik      |
| chr17:26087530-26088030   | 24 | 726    | -636   | D630044L22Rik      |
| chr3:89154490-89154990    | 24 | 331    | -809   | Adam15             |
| chr8:124253375-124253875  | 24 | 101    | -837   | Jph3               |
| chr4:34010415-34010915    | 24 | 0      | -941   | Cnr1               |
| chr16:22162120-22162620   | 24 | 0      | -963   | Igf2bp2            |
| chr15:39028495-39028995   | 24 | 0      | -1132  | Rims2              |
| chr15:80936360-80936860   | 24 | 500000 | -1162  | Mk11               |
| chr14:57504040-57504540   | 24 | 4      | -1199  | Zmym2              |
| chr18:24625510-24626010   | 24 | 0      | -3611  | 2700062C07Rik      |
| chr8:98051580-98052080    | 24 | 500000 | -6169  | Ccdc113            |
| chr6:81980020-81980520    | 24 | 11450  | -11396 | Tmem166            |
| chr10:88259525-88260025   | 24 | 29451  | -22060 | DRIM               |
| chr4:146900235-146900735  | 24 | 500000 | -26930 | OTTMUSG00000010673 |
| chr4:127637930-127638430  | 24 | 10603  | -27107 | AK046385           |

|                           |    |        |        |               |
|---------------------------|----|--------|--------|---------------|
| chr18:32136790-32137290   | 24 | 38011  | -27751 | Gpr17         |
| chr11:55162650-55163150   | 24 | 500000 | -37142 | Fat2          |
| chr1:149616700-149617200  | 23 | 500000 | 500000 |               |
| chr2:28631630-28632130    | 23 | 500000 | 500000 |               |
| chr3:130062400-130062900  | 23 | 500000 | 500000 |               |
| chr5:7645545-7646045      | 23 | 500000 | 500000 |               |
| chr9:118163830-118164330  | 23 | 500000 | 500000 |               |
| chr11:111471320-111471820 | 23 | 500000 | 500000 |               |
| chr12:26104460-26104960   | 23 | 500000 | 500000 |               |
| chr13:3372645-3373145     | 23 | 12307  | 500000 |               |
| chr17:86186260-86186760   | 23 | 12902  | 500000 |               |
| chr18:77495475-77495975   | 23 | 2181   | 500000 |               |
| chr10:24843790-24844290   | 23 | 500000 | 46999  | AK076839      |
| chr4:99811530-99812030    | 23 | 42750  | 43385  | Ror1          |
| chr14:70283285-70283785   | 23 | 500000 | 43309  | 1700081D17Rik |
| chr13:99160540-99161040   | 23 | 290    | 36591  | Foxd1         |
| chr10:86723840-86724340   | 23 | 500000 | 30586  | AK016129      |
| chr8:73956760-73957260    | 23 | 26690  | 27096  | Ankrd41       |
| chr7:25964230-25964730    | 23 | 0      | 27005  | AK142847      |
| chr8:34821065-34821565    | 23 | 20936  | 20970  | AK018937      |
| chr4:135737345-135737845  | 23 | 8463   | 9287   | E2f2          |
| chr8:91150600-91151100    | 23 | 147    | 9176   | 9130017C17Rik |
| chr2:33789225-33789725    | 23 | 32505  | 8194   | AK162388      |
| chr13:60879560-60880060   | 23 | 500000 | 7899   | BC051665      |
| chr11:5870580-5871080     | 23 | 1335   | 7684   | Camk2b        |
| chr13:95652360-95652860   | 23 | 125    | 7029   | Otp           |
| chr15:99414460-99414960   | 23 | 41     | 5208   | Aqp2          |
| chr19:44836555-44837055   | 23 | 2995   | 4922   | Pax2          |
| chr17:13744560-13745060   | 23 | 500000 | 2147   | BC068229      |
| chr1:121316770-121317270  | 23 | 0      | 1804   | Inhbb         |
| chr15:60654575-60655075   | 23 | 0      | 1689   | BC020326      |
| chr17:25391335-25391835   | 23 | 1262   | 1625   | Baiap3        |
| chr10:80641205-80641705   | 23 | 1656   | 1055   | Eef2          |
| chr2:120556180-120556680  | 23 | 124    | 1048   | Cdan1         |
| chr17:35371580-35372080   | 23 | 80     | 929    | Nfkbil1       |
| chr15:101631600-101632100 | 23 | 500000 | 912    | Krt73         |
| chr10:79180010-79180510   | 23 | 0      | 882    | Hcn2          |
| chr2:130866410-130866910  | 23 | 120    | 833    | Gfra4         |
| chr15:58912470-58912970   | 23 | 112    | 823    | Mtss1         |
| chr15:26239345-26239845   | 23 | 158    | 793    | March11       |
| chr6:120413760-120414260  | 23 | 159    | 759    | Il17ra        |
| chr9:20836950-20837450    | 23 | 472    | 667    | Icam5         |
| chr5:100947840-100948340  | 23 | 145    | 613    | Cops4         |
| chr11:120534700-120535200 | 23 | 100    | 599    | Aspscr1       |
| chr4:84191560-84192060    | 23 | 182    | 498    | Bnc2          |
| chr11:94981680-94982180   | 23 | 0      | 482    | Dlx3          |

|                           |    |        |        |                    |
|---------------------------|----|--------|--------|--------------------|
| chr2:5872740-5873240      | 23 | 0      | 476    | Upf2               |
| chr2:163575315-163575815  | 23 | 0      | 347    | Ada                |
| chr16:94085530-94086030   | 23 | 0      | 276    | Sim2               |
| chr1:167123925-167124425  | 23 | 0      | 275    | Sft2d2             |
| chr7:80932795-80933295    | 23 | 47148  | 144    | DQ718309           |
| chr6:87680735-87681235    | 23 | 0      | 123    | ABO41550           |
| chr18:24812005-24812505   | 23 | 0      | 64     | Mocos              |
| chr11:97560405-97560905   | 23 | 0      | -4     | Pcgf2              |
| chr1:168309170-168309670  | 23 | 135    | -10    | Tada1l             |
| chr8:67171650-67172150    | 23 | 0      | -64    | Cpe                |
| chr11:84632950-84633450   | 23 | 63     | -184   | Mrm1               |
| chr13:120276350-120276850 | 23 | 179    | -245   | EG633640           |
| chr9:75473000-75473500    | 23 | 13     | -288   | Lysmd2             |
| chr10:128181150-128181650 | 23 | 189    | -289   | Dgka               |
| chr16:32644390-32644890   | 23 | 0      | -306   | Tnk2               |
| chr1:60100090-60100590    | 23 | 0      | -313   | Ica1l              |
| chr5:23930570-23931070    | 23 | 80     | -316   | Slc4a2             |
| chr11:5965900-5966400     | 23 | 63     | -400   | Camk2b             |
| chr13:110050330-110050830 | 23 | 500000 | -425   | Pde4d              |
| chr5:120881190-120881690  | 23 | 380    | -469   | Lhx5               |
| chr15:102125925-102126425 | 23 | 395    | -580   | Espl1              |
| chr6:28782250-28782750    | 23 | 0      | -754   | Lrrc4              |
| chr5:21851050-21851550    | 23 | 105    | -778   | Reln               |
| chr9:58670230-58670730    | 23 | 0      | -838   | Hcn4               |
| chr5:112821875-112822375  | 23 | 1472   | -893   | Asphd2             |
| chr15:72377490-72377990   | 23 | 0      | -1032  | Kcnk9              |
| chr10:58275530-58276030   | 23 | 0      | -1070  | Sh3md4             |
| chr17:35356365-35356865   | 23 | 15295  | -1163  | AK080258           |
| chr2:172934880-172935380  | 23 | 500000 | -1205  | AK041254           |
| chr3:107263390-107263890  | 23 | 364    | -1825  | Kcnc4              |
| chr14:70758820-70759320   | 23 | 7684   | -7840  | fad123             |
| chr1:173478250-173478750  | 23 | 44169  | -10823 | Cd244              |
| chrX:166440230-166440730  | 23 | 4214   | -15610 | AK019053           |
| chr5:38234150-38234650    | 23 | 15608  | -18577 | Msx1               |
| chr19:42091370-42091870   | 23 | 34658  | -18907 | Ankrd2             |
| chr4:145018520-145019020  | 23 | 34674  | -35342 | NR_002888          |
| chr4:145158100-145158600  | 23 | 8643   | -48670 | OTTMUSG00000010173 |
| chr4:71686720-71687220    | 22 | 500000 | 500000 |                    |
| chr6:4112440-4112940      | 22 | 500000 | 500000 |                    |
| chr11:81036110-81036610   | 22 | 500000 | 500000 |                    |
| chr11:118431715-118432215 | 22 | 242    | 500000 |                    |
| chr14:10100070-10100570   | 22 | 500000 | 500000 |                    |
| chr17:86301610-86302110   | 22 | 500000 | 500000 |                    |
| chr7:85849110-85849610    | 22 | 500000 | 33537  | AK042016           |
| chr4:45713590-45714090    | 22 | 500000 | 17380  | Gm829              |
| chr4:146972415-146972915  | 22 | 500000 | 16872  | 2610305D13Rik      |

|                           |    |        |       |               |
|---------------------------|----|--------|-------|---------------|
| chr1:173448340-173448840  | 22 | 14259  | 14982 | Refbp2        |
| chr8:19976060-19976560    | 22 | 43479  | 8064  | AK081879      |
| chr5:135817720-135818220  | 22 | 7751   | 7774  | Fkbp6         |
| chr1:90114610-90115110    | 22 | 12486  | 6327  | Ugt1a1        |
| chr18:56597050-56597550   | 22 | 5253   | 5528  | Gramd3        |
| chr10:4526740-4527240     | 22 | 3936   | 4393  | Mtrf11        |
| chr1:173492970-173493470  | 22 | 500000 | 3897  | Cd244         |
| chr18:69755920-69756420   | 22 | 500000 | 3091  | Tcf4          |
| chr5:35623770-35624270    | 22 | 324    | 2806  | Adra2c        |
| chr14:67644960-67645460   | 22 | 17212  | 2656  | Ppp2r2a       |
| chr15:7763230-7763730     | 22 | 0      | 2470  | Gdnf          |
| chr15:74348570-74349070   | 22 | 0      | 2195  | Bai1          |
| chr12:111519135-111519635 | 22 | 1257   | 1946  | Dio3          |
| chr17:26976315-26976815   | 22 | 0      | 1944  | Nkx2-5        |
| chr6:31166655-31167155    | 22 | 0      | 1527  | BC145649      |
| chr12:15821925-15822425   | 22 | 0      | 1415  | Trib2         |
| chr1:90109650-90110150    | 22 | 7526   | 1367  | Ugt1a1        |
| chr19:42246035-42246535   | 22 | 884    | 1175  | Zfyve27       |
| chr15:85862840-85863340   | 22 | 0      | 1116  | Celsr1        |
| chr11:53165190-53165690   | 22 | 644    | 1106  | Aff4          |
| chr18:25911380-25911880   | 22 | 0      | 1027  | Bruno14       |
| chr10:60293125-60293625   | 22 | 0      | 953   | Unc5b         |
| chr14:35633990-35634490   | 22 | 425    | 919   | Grid1         |
| chr11:49839490-49839990   | 22 | 484    | 908   | Rnf130        |
| chr10:77364160-77364660   | 22 | 422    | 844   | Lrrc3         |
| chr1:193006160-193006660  | 22 | 0      | 801   | Atf3          |
| chr15:78259565-78260065   | 22 | 446    | 758   | Kctd17        |
| chr8:26629620-26630120    | 22 | 0      | 627   | Fgfr1         |
| chr1:38683225-38683725    | 22 | 163    | 613   | Aff3          |
| chr4:45838840-45839340    | 22 | 139    | 608   | Igfbp1        |
| chr11:4493960-4494460     | 22 | 5      | 607   | Mtmr3         |
| chr9:57788265-57788765    | 22 | 0      | 574   | Sema7a        |
| chr15:102797525-102798025 | 22 | 0      | 480   | Hoxc10        |
| chr3:67386910-67387410    | 22 | 157    | 471   | Mfsd1         |
| chr8:9977885-9978385      | 22 | 0      | 419   | Abhd13        |
| chr5:122043170-122043670  | 22 | 0      | 412   | Aldh2         |
| chr1:193398785-193399285  | 22 | 0      | 377   | Dtl           |
| chr8:70585570-70586070    | 22 | 152    | 364   | Psd3          |
| chr9:119487530-119488030  | 22 | 0      | 353   | Scn5a         |
| chr11:31269505-31270005   | 22 | 0      | 305   | Stc2          |
| chr6:121160840-121161340  | 22 | 26569  | 303   | Tuba8         |
| chr14:104866680-104867180 | 22 | 5366   | 285   | Pou4f1        |
| chr4:128561370-128561870  | 22 | 0      | 237   | Trim62        |
| chr9:40965090-40965590    | 22 | 0      | 236   | 2810457106Rik |
| chr4:116269860-116270360  | 22 | 0      | 124   | AK086654      |
| chr13:89881750-89882250   | 22 | 0      | 116   | Vcan          |

|                           |    |        |        |               |
|---------------------------|----|--------|--------|---------------|
| chr13:36209130-36209630   | 22 | 0      | 101    | Fars2         |
| chr11:74738880-74739380   | 22 | 0      | 74     | Srr           |
| chr1:192886720-192887220  | 22 | 0      | 61     | Nsl1          |
| chr7:25292000-25292500    | 22 | 0      | 46     | Zfp428        |
| chr10:105278330-105278830 | 22 | 0      | 46     | Ccdc59        |
| chr2:30247730-30248230    | 22 | 0      | 45     | Dolpp1        |
| chr14:32149675-32150175   | 22 | 0      | 16     | Capn7         |
| chr19:6057960-6058460     | 22 | 21     | -12    | Fau           |
| chr1:173489060-173489560  | 22 | 500000 | -13    | Cd244         |
| chr12:84828420-84828920   | 22 | 0      | -13    | Dpf3          |
| chr4:149461340-149461840  | 22 | 0      | -21    | Gpr157        |
| chr15:89185700-89186200   | 22 | 0      | -36    | Tmem112b      |
| chr6:124705865-124706365  | 22 | 9853   | -77    | Atn1          |
| chr2:157030125-157030625  | 22 | 0      | -121   | Rbl1          |
| chr17:88197235-88197735   | 22 | 0      | -152   | Kcnk12        |
| chr4:116828650-116829150  | 22 | 62     | -164   | LOC100042180  |
| chr3:122432710-122433210  | 22 | 0      | -179   | Pde5a         |
| chr4:124377460-124377960  | 22 | 13     | -243   | Fhl3          |
| chr17:46168820-46169320   | 22 | 0      | -372   | Vegf          |
| chr11:98210620-98211120   | 22 | 357    | -439   | Ppp1r1b       |
| chr2:25146030-25146530    | 22 | 0      | -459   | AK076389      |
| chr2:180511815-180512315  | 22 | 299    | -461   | Bhlhb4        |
| chr14:68551860-68552360   | 22 | 77     | -482   | Dock5         |
| chr9:110020180-110020680  | 22 | 106    | -513   | HELG          |
| chr13:55313750-55314250   | 22 | 0      | -564   | Nsd1          |
| chr1:133964880-133965380  | 22 | 306    | -621   | Mfsd4         |
| chr2:4638190-4638690      | 22 | 68     | -750   | E130319B15Rik |
| chr1:38685900-38686400    | 22 | 1222   | -2062  | Aff3          |
| chr2:154611505-154612005  | 22 | 4661   | -5137  | Raly          |
| chr6:22230290-22230790    | 22 | 500000 | -7689  | Wnt16         |
| chr13:63677125-63677625   | 22 | 2335   | -10548 | Ptch1         |
| chr3:152364425-152364925  | 22 | 12345  | -12388 | Pigk          |
| chr6:48071120-48071620    | 22 | 34525  | -34779 | Znf746        |
| chr5:125444220-125444720  | 22 | 47211  | -39374 | 3110032G18Rik |
| chr17:30064495-30064995   | 22 | 37861  | -39919 | Mdga1         |
| chr8:28087730-28088230    | 22 | 0      | -46350 | Erlin2        |
| chr3:149376270-149376770  | 21 | 500000 | 500000 |               |
| chr4:31281090-31281590    | 21 | 500000 | 500000 |               |
| chr4:150816910-150817410  | 21 | 42783  | 500000 |               |
| chr7:70901970-70902470    | 21 | 147    | 500000 |               |
| chr8:14306695-14307195    | 21 | 500000 | 500000 |               |
| chr9:56108120-56108620    | 21 | 500000 | 500000 |               |
| chr11:34444590-34445090   | 21 | 500000 | 500000 |               |
| chr11:91221660-91222160   | 21 | 500000 | 500000 |               |
| chr12:33280090-33280590   | 21 | 500000 | 500000 |               |
| chr15:87798285-87798785   | 21 | 500000 | 500000 |               |

|                           |    |        |        |               |
|---------------------------|----|--------|--------|---------------|
| chr17:70697120-70697620   | 21 | 500000 | 500000 |               |
| chr18:43135390-43135890   | 21 | 500000 | 500000 |               |
| chr13:43929645-43930145   | 21 | 29944  | 49324  | CD83          |
| chr6:136951150-136951650  | 21 | 500000 | 48357  | Pde6h         |
| chr16:92780395-92780895   | 21 | 500000 | 45665  | Runx1         |
| chr4:145152390-145152890  | 21 | 14353  | 43805  | BC086318      |
| chr13:96711035-96711535   | 21 | 19907  | 43519  | mKIAA1054     |
| chr12:17736360-17736860   | 21 | 38268  | 38991  | Hpcal1        |
| chr17:35755720-35756220   | 21 | 48350  | 24669  | Dpcr1         |
| chr9:56865310-56865810    | 21 | 21914  | 22786  | Ptpn9         |
| chr17:30703090-30703590   | 21 | 9226   | 9773   | Btbd9         |
| chrX:55286825-55287325    | 21 | 1990   | 2900   | Zic3          |
| chr11:5962870-5963370     | 21 | 1879   | 2630   | Camk2b        |
| chr5:28791370-28791870    | 21 | 0      | 2007   | Shh           |
| chr1:173463390-173463890  | 21 | 29309  | 1783   | Itln1         |
| chr4:137950450-137950950  | 21 | 102    | 1742   | LOC625638     |
| chr11:59919525-59920025   | 21 | 0      | 1261   | Rai1          |
| chr4:147503420-147503920  | 21 | 1001   | 1136   | 2610109H07Rik |
| chr10:40604015-40604515   | 21 | 0      | 887    | Wasf1         |
| chr13:96901410-96901910   | 21 | 303    | 871    | Sv2c          |
| chr1:121317765-121318265  | 21 | 0      | 809    | Inhbb         |
| chr9:107611320-107611820  | 21 | 3      | 779    | Sema3f        |
| chr19:5456475-5456975     | 21 | 341    | 778    | Ccdc85b       |
| chr14:104866205-104866705 | 21 | 5841   | 760    | Pou4f1        |
| chr12:60319430-60319930   | 21 | 342    | 758    | Fbxo33        |
| chr5:15441095-15441595    | 21 | 191    | 740    | Cacna2d1      |
| chr6:146991765-146992265  | 21 | 251    | 724    | Mrps35        |
| chr3:137528005-137528505  | 21 | 0      | 693    | H2afz         |
| chr19:43750100-43750600   | 21 | 0      | 683    | AK076978      |
| chr16:91226215-91226715   | 21 | 0      | 671    | Olig2         |
| chr15:102087010-102087510 | 21 | 313    | 653    | Rarg          |
| chr11:20640620-20641120   | 21 | 0      | 616    | Aftph         |
| chr19:19184820-19185320   | 21 | 0      | 615    | Rorb          |
| chr9:122026810-122027310  | 21 | 49     | 604    | Snrk          |
| chr14:60244480-60244980   | 21 | 0      | 586    | Tmem46        |
| chr2:53051420-53051920    | 21 | 121    | 526    | Arl6ip6       |
| chr13:55200910-55201410   | 21 | 19     | 495    | Uimc1         |
| chr11:30785600-30786100   | 21 | 243    | 493    | Gpr75         |
| chr14:55050695-55051195   | 21 | 0      | 490    | Mmp14         |
| chrX:39264340-39264840    | 21 | 0      | 487    | Thoc2         |
| chr11:11925610-11926110   | 21 | 0      | 466    | Grb10         |
| chr11:98656970-98657470   | 21 | 0      | 391    | 4121402D02Rik |
| chr10:62485945-62486445   | 21 | 0      | 390    | AK156477      |
| chr11:88578915-88579415   | 21 | 0      | 377    | Msi2          |
| chr2:70401040-70401540    | 21 | 0      | 335    | Gad1          |
| chr8:126038695-126039195  | 21 | 0      | 306    | Dbn1          |

|                           |    |        |        |                    |
|---------------------------|----|--------|--------|--------------------|
| chr8:69384920-69385420    | 21 | 90     | 301    | BC053440           |
| chr3:53960340-53960840    | 21 | 374    | 296    | Trpc4              |
| chr19:4712440-4712940     | 21 | 53     | 283    | Spnb3              |
| chr15:90509325-90509825   | 21 | 0      | 243    | Cpne8              |
| chr2:65077040-65077540    | 21 | 1      | 169    | Cobll1             |
| chr18:7868740-7869240     | 21 | 0      | 143    | Wac                |
| chr3:35652950-35653450    | 21 | 0      | 141    | Atp11b             |
| chr13:99124050-99124550   | 21 | 0      | 101    | Foxd1              |
| chr15:98701280-98701780   | 21 | 174    | 85     | BC012717           |
| chr18:44821695-44822195   | 21 | 39     | -26    | Mcc                |
| chr11:116514560-116515060 | 21 | 156    | -37    | Prcd               |
| chr13:34129190-34129690   | 21 | 0      | -69    | Bphl               |
| chr12:102956570-102957070 | 21 | 3      | -109   | Tc2n               |
| chr10:107599095-107599595 | 21 | 0      | -110   | Ppp1r12a           |
| chr4:124663260-124663760  | 21 | 0      | -163   | Rspo1              |
| chr11:116689290-116689790 | 21 | 70     | -181   | Mxra7              |
| chr6:99676445-99676945    | 21 | 0      | -310   | Prok2              |
| chr15:97076970-97077470   | 21 | 160    | -317   | BC038822           |
| chr2:119152025-119152525  | 21 | 0      | -343   | AK039958           |
| chr9:44306510-44307010    | 21 | 0      | -458   | Bcl9l              |
| chr11:69809660-69810160   | 21 | 0      | -582   | Phf23              |
| chr11:72303790-72304290   | 21 | 329    | -619   | BC011467           |
| chr17:24624855-24625355   | 21 | 178    | -622   | Caskin1            |
| chr1:93697135-93697635    | 21 | 78     | -668   | Twist2             |
| chr10:83903670-83904170   | 21 | 0      | -705   | Nuak1              |
| chr1:184272215-184272715  | 21 | 750    | -729   | Fbxo28             |
| chr14:58690540-58691040   | 21 | 0      | -732   | Fgf9               |
| chr17:27650430-27650930   | 21 | 0      | -904   | Grm4               |
| chr10:107767950-107768450 | 21 | 999    | -1044  | Pawr               |
| chr4:130124090-130124590  | 21 | 1156   | -1434  | 2610200G18Rik      |
| chr1:90196945-90197445    | 21 | 22917  | -2662  | Trpm8              |
| chr10:61444440-61444940   | 21 | 2641   | -2835  | Col13a1            |
| chr1:90130370-90130870    | 21 | 28246  | -4062  | AK133186           |
| chr1:90194660-90195160    | 21 | 20632  | -4947  | Trpm8              |
| chr10:82815335-82815835   | 21 | 7168   | -7412  | D10Wsu102e         |
| chr1:173481460-173481960  | 21 | 47379  | -7613  | Cd244              |
| chr17:72012000-72012500   | 21 | 45912  | -10350 | 4632412N22Rik      |
| chr1:173475875-173476375  | 21 | 41794  | -10702 | Itln1              |
| chr1:193932170-193932670  | 21 | 15788  | -15976 | Traf5              |
| chr4:145037170-145037670  | 21 | 16024  | -16692 | NR_002888          |
| chr4:131722460-131722960  | 21 | 22068  | -18219 | DQ713846           |
| chrX:166446065-166446565  | 21 | 10049  | -21445 | AK019053           |
| chr6:38613465-38613965    | 21 | 334    | -26477 | Klrg2              |
| chr2:27698540-27699040    | 21 | 42893  | -43414 | Col5a1             |
| chr4:146883530-146884030  | 21 | 500000 | -43635 | OTTMUSG00000010673 |
| chr11:76436425-76436925   | 21 | 0      | -45447 | Abr                |



|                           |    |        |        |               |
|---------------------------|----|--------|--------|---------------|
| chr1:46657115-46657615    | 20 | 500000 | 500000 |               |
| chr1:48938160-48938660    | 20 | 500000 | 500000 |               |
| chr1:51428545-51429045    | 20 | 500000 | 500000 |               |
| chr1:181250480-181250980  | 20 | 500000 | 500000 |               |
| chr3:21597000-21597500    | 20 | 500000 | 500000 |               |
| chr3:143954395-143954895  | 20 | 500000 | 500000 |               |
| chr4:29829295-29829795    | 20 | 500000 | 500000 |               |
| chr4:146873310-146873810  | 20 | 500000 | 500000 |               |
| chr6:119058840-119059340  | 20 | 24     | 500000 |               |
| chr8:82025810-82026310    | 20 | 500000 | 500000 |               |
| chr10:89335735-89336235   | 20 | 0      | 500000 |               |
| chr10:95540035-95540535   | 20 | 500000 | 500000 |               |
| chr11:7265350-7265850     | 20 | 500000 | 500000 |               |
| chr11:71734480-71734980   | 20 | 500000 | 500000 |               |
| chr11:74335615-74336115   | 20 | 0      | 500000 |               |
| chr12:33279155-33279655   | 20 | 500000 | 500000 |               |
| chr16:3271560-3272060     | 20 | 500000 | 500000 |               |
| chr17:3004990-3005490     | 20 | 500000 | 500000 |               |
| chr17:67148530-67149030   | 20 | 500000 | 500000 |               |
| chr19:42745210-42745710   | 20 | 500000 | 500000 |               |
| chr4:145144950-145145450  | 20 | 21793  | 36365  | BC086318      |
| chr5:148035840-148036340  | 20 | 34245  | 35819  | Gsx1          |
| chr5:148177590-148178090  | 20 | 33642  | 34224  | Flt3          |
| chr7:25965000-25965500    | 20 | 247    | 27775  | AK142847      |
| chr6:100681930-100682430  | 20 | 27005  | 27453  | Glt8d4        |
| chr8:95698240-95698740    | 20 | 500000 | 23212  | Ces3          |
| chr5:122979340-122979840  | 20 | 26833  | 15562  | AK006664      |
| chr8:126057210-126057710  | 20 | 12141  | 14726  | Gas8          |
| chr8:87311550-87312050    | 20 | 2860   | 12438  | Nfix          |
| chr5:33072515-33073015    | 20 | 500000 | 12116  | Pisd          |
| chrX:33747190-33747690    | 20 | 500000 | 11458  | Zcchc12       |
| chr11:85657180-85657680   | 20 | 164    | 11314  | Tbx2          |
| chr1:173455100-173455600  | 20 | 21019  | 10073  | Itln1         |
| chr13:45625915-45626415   | 20 | 23028  | 9945   | Gmpr          |
| chr1:173498655-173499155  | 20 | 500000 | 9582   | Cd244         |
| chr15:82045110-82045610   | 20 | 1971   | 9405   | Tnfrsf13c     |
| chr7:4424230-4424730      | 20 | 28196  | 8030   | Eps8l1        |
| chr10:57687900-57688400   | 20 | 29942  | 7272   | Dux           |
| chr17:72946690-72947190   | 20 | 5840   | 6706   | Alk           |
| chr7:149851850-149852350  | 20 | 1808   | 6503   | NR_002855     |
| chr9:108733850-108734350  | 20 | 80     | 5450   | Celsr3        |
| chr4:147178680-147179180  | 20 | 500000 | 5018   | AK163132      |
| chr1:183675730-183676230  | 20 | 500000 | 4814   | A230079K17Rik |
| chr11:102980920-102981420 | 20 | 1870   | 3532   | Hexim1        |
| chr3:89763790-89764290    | 20 | 211    | 3389   | Atp8b2        |
| chrX:130884300-130884800  | 20 | 41795  | 3189   | Cenpi         |

|                           |    |      |      |               |
|---------------------------|----|------|------|---------------|
| chr9:58046210-58046710    | 20 | 0    | 3061 | Islr2         |
| chr11:98187945-98188445   | 20 | 163  | 2763 | Neurod2       |
| chr11:105802590-105803090 | 20 | 2189 | 2620 | Cyb561        |
| chr5:102091420-102091920  | 20 | 658  | 2059 | Nkx6-1        |
| chr2:31527750-31528250    | 20 | 1438 | 1744 | Exosc2        |
| chr5:35733165-35733665    | 20 | 1299 | 1650 | Hmx1          |
| chr5:28493590-28494090    | 20 | 62   | 1605 | En2           |
| chr8:87427025-87427525    | 20 | 0    | 1449 | Klf1          |
| chr10:120414750-120415250 | 20 | 0    | 1385 | Lemd3         |
| chr10:86954800-86955300   | 20 | 140  | 1354 | Ascl1         |
| chr7:4728055-4728555      | 20 | 187  | 1321 | Il11          |
| chr3:157230770-157231270  | 20 | 217  | 1165 | Ptger3        |
| chr11:52579085-52579585   | 20 | 561  | 1128 | Fstl4         |
| chr15:6659225-6659725     | 20 | 0    | 1093 | 4921505C17Rik |
| chr11:72223885-72224385   | 20 | 498  | 1079 | Smtnl2        |
| chr2:132705310-132705810  | 20 | 67   | 1037 | B430119L13Rik |
| chr4:120339945-120340445  | 20 | 133  | 1028 | Cited4        |
| chr6:118146510-118147010  | 20 | 0    | 1001 | Ret           |
| chr3:52073045-52073545    | 20 | 0    | 1000 | Foxo1         |
| chr4:106295785-106296285  | 20 | 331  | 982  | Ttc22         |
| chr14:46276670-46277170   | 20 | 0    | 897  | Ddhd1         |
| chr5:34630045-34630545    | 20 | 0    | 677  | Zfyve28       |
| chr10:80756145-80756645   | 20 | 137  | 671  | Pip5k1c       |
| chr8:109619550-109620050  | 20 | 51   | 644  | Terf2         |
| chr13:59870260-59870760   | 20 | 164  | 639  | Isca1         |
| chr11:103511190-103511690 | 20 | 0    | 618  | Rprml         |
| chr13:58374685-58375185   | 20 | 0    | 613  | Gkap1         |
| chr14:76245495-76245995   | 20 | 0    | 608  | Tpt1          |
| chr9:123439250-123439750  | 20 | 186  | 501  | Sacm11        |
| chr9:96097005-96097505    | 20 | 87   | 489  | Tfdp2         |
| chr4:147505255-147505755  | 20 | 102  | 477  | Mad2l2        |
| chr19:6047360-6047860     | 20 | 128  | 466  | Syvn1         |
| chr10:126337700-126338200 | 20 | 57   | 460  | Xrcc6bp1      |
| chr1:134287160-134287660  | 20 | 557  | 447  | Tmcc2         |
| chr7:87376820-87377320    | 20 | 227  | 431  | Cib1          |
| chr12:32035650-32036150   | 20 | 0    | 362  | Dld           |
| chr3:10330770-10331270    | 20 | 0    | 351  | Impa1         |
| chr11:86298270-86298770   | 20 | 0    | 349  | 0610013E23Rik |
| chr1:60099345-60099845    | 20 | 0    | 335  | Ica1l         |
| chr2:167486465-167486965  | 20 | 81   | 328  | Tmem189       |
| chr6:146582555-146583055  | 20 | 0    | 308  | Tm7sf3        |
| chr7:108469820-108470320  | 20 | 0    | 307  | Stard10       |
| chr4:108292575-108293075  | 20 | 0    | 265  | Cc2d1b        |
| chr18:24867930-24868430   | 20 | 0    | 235  | Fhod3         |
| chr17:33102760-33103260   | 20 | 0    | 224  | Zfp472        |
| chr15:85411550-85412050   | 20 | 0    | 211  | Wnt7b         |

|                           |    |        |        |                    |
|---------------------------|----|--------|--------|--------------------|
| chr5:24092515-24093015    | 20 | 0      | 204    | 2010209O12Rik      |
| chr10:58684150-58684650   | 20 | 0      | 194    | Sept10             |
| chr13:43399140-43399640   | 20 | 0      | 150    | Gfod1              |
| chr12:78339000-78339500   | 20 | 0      | 139    | Fut8               |
| chr7:74904275-74904775    | 20 | 0      | 102    | Dmn                |
| chr3:84063380-84063880    | 20 | 0      | 69     | Trim2              |
| chr19:28754250-28754750   | 20 | 0      | 66     | Glis3              |
| chr10:82800300-82800800   | 20 | 0      | 11     | Slc41a2            |
| chr4:107474395-107474895  | 20 | 449    | -218   | Lrp8               |
| chr11:101286630-101287130 | 20 | 0      | -234   | 1700113122Rik      |
| chr4:115500130-115500630  | 20 | 161    | -316   | Mobkl2c            |
| chr15:54903090-54903590   | 20 | 131    | -339   | Taf2               |
| chr15:75812540-75813040   | 20 | 136    | -378   | 2410075B13Rik      |
| chr7:123587105-123587605  | 20 | 0      | -384   | Pik3c2a            |
| chr11:119409270-119409770 | 20 | 0      | -387   | Nptx1              |
| chr17:3084190-3084690     | 20 | 0      | -399   | AK132606           |
| chr11:71855340-71855840   | 20 | 110    | -413   | 6720460F02Rik      |
| chr19:24248650-24249150   | 20 | 0      | -423   | Tjp2               |
| chr5:65827295-65827795    | 20 | 239    | -465   | Ugdh               |
| chr2:19366550-19367050    | 20 | 163    | -489   | Ptf1a              |
| chr12:113368355-113368855 | 20 | 0      | -532   | CS444510           |
| chr16:60605765-60606265   | 20 | 0      | -659   | Epha6              |
| chrX:166425290-166425790  | 20 | 0      | -670   | AK019053           |
| chr2:153270840-153271340  | 20 | 153    | -877   | 8430427H17Rik      |
| chr9:31721650-31722150    | 20 | 0      | -1031  | Barx2              |
| chr15:102794120-102794620 | 20 | 2562   | -2925  | Hoxc10             |
| chr2:38359905-38360405    | 20 | 7063   | -7064  | Nek6               |
| chr9:67679360-67679860    | 20 | 59     | -8592  | Vps13c             |
| chr15:68850650-68851150   | 20 | 500000 | -9244  | etoile             |
| chr15:89387400-89387900   | 20 | 553    | -11106 | Acr                |
| chr11:114939960-114940460 | 20 | 12554  | -12534 | Rab37              |
| chr2:31787955-31788455    | 20 | 17424  | -17617 | 2810003C17Rik      |
| chr5:15052115-15052615    | 20 | 500000 | -19359 | Speer4c            |
| chr10:10841190-10841690   | 20 | 27563  | -27787 | Shprh              |
| chr4:146896345-146896845  | 20 | 500000 | -30820 | OTTMUSG00000010673 |
| chr8:91013695-91014195    | 20 | 31314  | -31323 | Nkd1               |
| chr19:61340080-61340580   | 20 | 35716  | -36069 | Csf2ra             |
| chr17:23655850-23656350   | 20 | 27521  | -39537 | EG619788           |
| chr3:21575350-21575850    | 19 | 500000 | 500000 |                    |
| chr3:82930710-82931210    | 19 | 203    | 500000 |                    |
| chr4:144998515-144999015  | 19 | 500000 | 500000 |                    |
| chr5:33775285-33775785    | 19 | 0      | 500000 |                    |
| chr5:37898635-37899135    | 19 | 500000 | 500000 |                    |
| chr5:118825390-118825890  | 19 | 5171   | 500000 |                    |
| chr7:70903470-70903970    | 19 | 175    | 500000 |                    |
| chr8:11181640-11182140    | 19 | 5904   | 500000 |                    |

|                           |    |        |        |               |
|---------------------------|----|--------|--------|---------------|
| chr9:11743120-11743620    | 19 | 500000 | 500000 |               |
| chr9:31840335-31840835    | 19 | 0      | 500000 |               |
| chr9:62281130-62281630    | 19 | 500000 | 500000 |               |
| chr9:70653760-70654260    | 19 | 500000 | 500000 |               |
| chr9:100221950-100222450  | 19 | 500000 | 500000 |               |
| chr10:6246450-6246950     | 19 | 500000 | 500000 |               |
| chr10:29725885-29726385   | 19 | 500000 | 500000 |               |
| chr10:49955850-49956350   | 19 | 500000 | 500000 |               |
| chr11:63113195-63113695   | 19 | 500000 | 500000 |               |
| chr11:71732835-71733335   | 19 | 500000 | 500000 |               |
| chr13:45932685-45933185   | 19 | 500000 | 500000 |               |
| chr13:95472870-95473370   | 19 | 148    | 500000 |               |
| chr14:18602190-18602690   | 19 | 500000 | 500000 |               |
| chr17:63086680-63087180   | 19 | 500000 | 500000 |               |
| chr19:54343055-54343555   | 19 | 500000 | 500000 |               |
| chr3:84233610-84234110    | 19 | 500000 | 49552  | 6330505N24Rik |
| chr13:24647430-24647930   | 19 | 500000 | 48427  | AK139092      |
| chr4:44678540-44679040    | 19 | 1245   | 44521  | Pax5          |
| chr5:52625465-52625965    | 19 | 43731  | 43796  | AK079034      |
| chr17:88154310-88154810   | 19 | 8429   | 42773  | Kcnk12        |
| chr17:67942540-67943040   | 19 | 500000 | 39272  | Lrrc30        |
| chr13:91096915-91097415   | 19 | 33926  | 34385  | Rps23         |
| chrX:11711355-11711855    | 19 | 667    | 25875  | Bcor          |
| chr12:36751150-36751650   | 19 | 17217  | 17664  | Tspan13       |
| chr5:33068830-33069330    | 19 | 500000 | 15801  | Pisd          |
| chrX:98509555-98510055    | 19 | 40364  | 15257  | Nlgn3         |
| chr2:36558430-36558930    | 19 | 500000 | 15157  | Olfir346      |
| chr4:139373535-139374035  | 19 | 3279   | 15097  | Pax7          |
| chr6:48468590-48469090    | 19 | 35873  | 14505  | AK129160      |
| chr1:90148840-90149340    | 19 | 24698  | 14408  | AK133186      |
| chr13:96234810-96235310   | 19 | 500000 | 13549  | S100z         |
| chr17:56640550-56641050   | 19 | 9921   | 11105  | Znrf4         |
| chr15:31376665-31377165   | 19 | 6202   | 6528   | Ropn11        |
| chr7:127323350-127323850  | 19 | 500000 | 6211   | Anks4b        |
| chr7:148348160-148348660  | 19 | 6014   | 6177   | Rnh1          |
| chr9:62990400-62990900    | 19 | 66     | 4136   | Lbxcor1       |
| chr12:70754865-70755365   | 19 | 27197  | 3931   | Sos2          |
| chr16:17834490-17834990   | 19 | 318    | 3538   | Car15         |
| chr3:120962045-120962545  | 19 | 3130   | 3511   | Tmem56        |
| chr4:151499795-151500295  | 19 | 0      | 2988   | Espn          |
| chr17:13743730-13744230   | 19 | 500000 | 2977   | BC068229      |
| chr18:7001750-7002250     | 19 | 294    | 2753   | Mkx           |
| chr15:84682770-84683270   | 19 | 873    | 2508   | Phf21b        |
| chr14:104864475-104864975 | 19 | 7571   | 2490   | Pou4f1        |
| chrX:166422400-166422900  | 19 | 206    | 2220   | AK019053      |
| chr5:125340300-125340800  | 19 | 1453   | 2040   | Ccdc92        |

|                           |    |       |      |               |
|---------------------------|----|-------|------|---------------|
| chr7:85720930-85721430    | 19 | 1629  | 1680 | Ntrk3         |
| chr17:3077690-3078190     | 19 | 6385  | 1611 | AK206103      |
| chr2:144994980-144995480  | 19 | 1167  | 1382 | Slc24a3       |
| chr15:36722560-36723060   | 19 | 0     | 1188 | Ywhaz         |
| chr6:91359940-91360440    | 19 | 236   | 1172 | Wnt7a         |
| chr19:3768920-3769420     | 19 | 68    | 1149 | Suv420h1      |
| chr15:75898900-75899400   | 19 | 383   | 1009 | Scrib         |
| chr16:8737210-8737710     | 19 | 341   | 974  | Usp7          |
| chr4:139387725-139388225  | 19 | 0     | 907  | Pax7          |
| chr17:80294350-80294850   | 19 | 0     | 862  | Arl6ip2       |
| chr14:57431415-57431915   | 19 | 23    | 840  | 2410022M11Rik |
| chr4:47221450-47221950    | 19 | 10    | 817  | Col15a1       |
| chr19:53675485-53675985   | 19 | 195   | 799  | Smc3          |
| chr9:96263710-96264210    | 19 | 73    | 757  | Atp1b3        |
| chr1:77510670-77511170    | 19 | 4     | 742  | Epha4         |
| chr10:57694445-57694945   | 19 | 23397 | 727  | Dux           |
| chr1:90200325-90200825    | 19 | 26297 | 718  | Trpm8         |
| chr1:193641740-193642240  | 19 | 3138  | 716  | AK017306      |
| chr3:109144020-109144520  | 19 | 199   | 670  | Vav3          |
| chr8:106864910-106865410  | 19 | 38    | 667  | Cmtm3         |
| chr12:32634190-32634690   | 19 | 0     | 647  | Hbp1          |
| chr8:85388100-85388600    | 19 | 0     | 638  | AK170194      |
| chr2:38207200-38207700    | 19 | 0     | 623  | Lhx2          |
| chr10:126616785-126617285 | 19 | 260   | 602  | C78409        |
| chr2:163679830-163680330  | 19 | 243   | 595  | Kcnk15        |
| chr4:73898170-73898670    | 19 | 79    | 569  | Jmjd2c        |
| chrX:166416040-166416540  | 19 | 6566  | 558  | AK149987      |
| chr15:82978980-82979480   | 19 | 50    | 535  | Poldip3       |
| chr5:28785085-28785585    | 19 | 0     | 522  | AK053224      |
| chr3:62142935-62143435    | 19 | 0     | 487  | 4631416L12Rik |
| chr3:105253925-105254425  | 19 | 755   | 469  | AK018929      |
| chr6:100620420-100620920  | 19 | 0     | 455  | Shq1          |
| chr11:103814665-103815165 | 19 | 12873 | 454  | Nsf           |
| chr5:141124280-141124780  | 19 | 91    | 447  | Ttyh3         |
| chr8:123606235-123606735  | 19 | 99    | 446  | AK087264      |
| chr17:46765700-46766200   | 19 | 0     | 434  | Ptk7          |
| chr1:74818640-74819140    | 19 | 108   | 425  | Wnt6          |
| chr2:30329075-30329575    | 19 | 0     | 393  | Ier5l         |
| chr6:63206975-63207475    | 19 | 0     | 375  | Grid2         |
| chr14:68702055-68702555   | 19 | 0     | 365  | Nefl          |
| chr18:73974430-73974930   | 19 | 95    | 365  | Me2           |
| chr9:96378400-96378900    | 19 | 0     | 363  | Rnf7          |
| chr6:18464220-18464720    | 19 | 46    | 354  | Cttnbp2       |
| chr6:72848685-72849185    | 19 | 0     | 350  | Kcmf1         |
| chr11:11014835-11015335   | 19 | 500   | 339  | Vwc2          |
| chr2:73748795-73749295    | 19 | 0     | 305  | Atp5g3        |

|                           |    |        |       |               |
|---------------------------|----|--------|-------|---------------|
| chr11:70246170-70246670   | 19 | 28     | 266   | Arrb2         |
| chr16:4212910-4213410     | 19 | 0      | 243   | Crebbp        |
| chr1:133724540-133725040  | 19 | 0      | 237   | Slc41a1       |
| chr17:8627270-8627770     | 19 | 0      | 233   | T             |
| chr13:63341315-63341815   | 19 | 0      | 215   | apo           |
| chr9:64880540-64881040    | 19 | 0      | 206   | Dpp8          |
| chr16:36828030-36828530   | 19 | 0      | 64    | Eaf2          |
| chr5:136611565-136612065  | 19 | 0      | 55    | 1200011O22Rik |
| chr3:40754500-40755000    | 19 | 0      | 37    | 1700108L22Rik |
| chr11:98543640-98544140   | 19 | 0      | 23    | Psmc3         |
| chr4:154010720-154011220  | 19 | 0      | 11    | Prdm16        |
| chr5:122841690-122842190  | 19 | 0      | 4     | Arpc3         |
| chr10:80532640-80533140   | 19 | 0      | -4    | Thop1         |
| chr7:52391580-52392080    | 19 | 7071   | -29   | Flt3l         |
| chr4:47486985-47487485    | 19 | 0      | -39   | Alg2          |
| chr8:36439270-36439770    | 19 | 0      | -212  | Ppp1r3b       |
| chr4:119095010-119095510  | 19 | 0      | -217  | Zmynd12       |
| chr15:100700620-100701120 | 19 | 479    | -243  | Scn8a         |
| chr10:79818680-79819180   | 19 | 205    | -273  | 6330514A18Rik |
| chr4:6117725-6118225      | 19 | 96     | -276  | 3110003A22Rik |
| chr3:148652470-148652970  | 19 | 0      | -277  | Lphn2         |
| chr3:97816905-97817405    | 19 | 76     | -305  | Notch2        |
| chr2:154395730-154396230  | 19 | 47     | -393  | E2f1          |
| chr10:84849920-84850420   | 19 | 0      | -393  | Btbd11        |
| chr10:90633360-90633860   | 19 | 0      | -404  | Tmpo          |
| chr10:80306950-80307450   | 19 | 153    | -426  | BC072620      |
| chr15:99420745-99421245   | 19 | 0      | -463  | Aqp5          |
| chr17:24591080-24591580   | 19 | 270    | -479  | BC026600      |
| chr15:91022510-91023010   | 19 | 7103   | -523  | Abcd2         |
| chr7:73006320-73006820    | 19 | 102    | -528  | Pcsk6         |
| chr8:97604280-97604780    | 19 | 247    | -570  | Katnb1        |
| chr14:73110130-73110630   | 19 | 0      | -571  | Fndc3a        |
| chr10:42303740-42304240   | 19 | 0      | -597  | Nr2e1         |
| chr17:26252670-26253170   | 19 | 2154   | -655  | Tmem8         |
| chr1:183142050-183142550  | 19 | 0      | -800  | Wdr26         |
| chr17:5940310-5940810     | 19 | 333    | -817  | Synj2         |
| chr9:32349640-32350140    | 19 | 917    | -938  | Fli1          |
| chr18:81184210-81184710   | 19 | 0      | -1144 | Sall3         |
| chr5:31396970-31397470    | 19 | 355    | -1350 | Slc30a3       |
| chr11:120091490-120091990 | 19 | 496    | -2520 | Bahcc1        |
| chr2:179802390-179802890  | 19 | 2586   | -2657 | Gtpbp5        |
| chr15:58917010-58917510   | 19 | 3168   | -3717 | mKIAA0429     |
| chr13:15091695-15092195   | 19 | 500000 | -4033 | AK085253      |
| chr7:144510775-144511275  | 19 | 3008   | -4898 | Ebf3          |
| chr3:113338255-113338755  | 19 | 5313   | -5439 | mKIAA1839     |
| chr1:173471270-173471770  | 19 | 37189  | -6097 | Itln1         |

|                           |    |        |        |                    |
|---------------------------|----|--------|--------|--------------------|
| chr3:113339115-113339615  | 19 | 6173   | -6299  | mKIAA1839          |
| chr4:147194960-147195460  | 19 | 47266  | -11262 | AK163132           |
| chr2:101866100-101866600  | 19 | 32364  | -13435 | AK079670           |
| chr17:74008090-74008590   | 19 | 500000 | -18781 | AK085353           |
| chr10:83161970-83162470   | 19 | 23199  | -23422 | AK153590           |
| chr8:99009790-99010290    | 19 | 500000 | -26199 | AK006709           |
| chr8:22136615-22137115    | 19 | 500000 | -28358 | Defcr21            |
| chr11:103965460-103965960 | 19 | 28128  | -28485 | Crhr1              |
| chr16:92730815-92731315   | 19 | 31930  | -33493 | Runx1              |
| chr10:57165120-57165620   | 19 | 40625  | -40921 | Hsf2               |
| chr4:146885705-146886205  | 19 | 500000 | -41460 | OTTMUSG00000010673 |
| chr1:12634600-12635100    | 19 | 500000 | -47759 | Sulf1              |
| chr1:93751995-93752495    | 18 | 500000 | 500000 |                    |
| chr1:128926360-128926860  | 18 | 500000 | 500000 |                    |
| chr1:169032225-169032725  | 18 | 500000 | 500000 |                    |
| chr1:197105190-197105690  | 18 | 37385  | 500000 |                    |
| chr3:143230230-143230730  | 18 | 500000 | 500000 |                    |
| chr4:71687895-71688395    | 18 | 500000 | 500000 |                    |
| chr7:136967245-136967745  | 18 | 500000 | 500000 |                    |
| chr7:150364440-150364940  | 18 | 500000 | 500000 |                    |
| chr10:109892820-109893320 | 18 | 0      | 500000 |                    |
| chr10:123113130-123113630 | 18 | 500000 | 500000 |                    |
| chr11:91222245-91222745   | 18 | 500000 | 500000 |                    |
| chr12:81445540-81446040   | 18 | 4723   | 500000 |                    |
| chr13:16570310-16570810   | 18 | 500000 | 500000 |                    |
| chr16:3231585-3232085     | 18 | 500000 | 500000 |                    |
| chr18:81512375-81512875   | 18 | 500000 | 500000 |                    |
| chrX:4658460-4658960      | 18 | 500000 | 500000 |                    |
| chrX:166611620-166612120  | 18 | 500000 | 500000 |                    |
| chr11:85787960-85788460   | 18 | 500000 | 49641  | AK135737           |
| chr9:113888630-113889130  | 18 | 8923   | 46988  | Fbxl2              |
| chr4:99812905-99813405    | 18 | 44125  | 44760  | Ror1               |
| chr1:135060050-135060550  | 18 | 53     | 32261  | Ppp1r15b           |
| chr11:60200070-60200570   | 18 | 29922  | 30186  | Atpaf2             |
| chr4:107326095-107326595  | 18 | 29804  | 29836  | Dmrtb1             |
| chr15:79312140-79312640   | 18 | 3364   | 23280  | Kcnj4              |
| chr1:90151615-90152115    | 18 | 21923  | 17183  | AK133186           |
| chr1:90155840-90156340    | 18 | 17698  | 16669  | A730008H23Rik      |
| chr7:73394975-73395475    | 18 | 500000 | 15231  | Lrrk1              |
| chr1:173445010-173445510  | 18 | 10929  | 11652  | Refbp2             |
| chr5:135815250-135815750  | 18 | 10221  | 10244  | Fkbp6              |
| chr15:98410245-98410745   | 18 | 11832  | 9061   | 4930415O20Rik      |
| chr18:36274335-36274835   | 18 | 46100  | 8729   | 4930471G03Rik      |
| chr1:90116975-90117475    | 18 | 14851  | 8692   | Ugt1a1             |
| chr1:173457010-173457510  | 18 | 22929  | 8163   | Itln1              |
| chr8:126050200-126050700  | 18 | 11183  | 7716   | Gas8               |

|                           |    |        |      |               |
|---------------------------|----|--------|------|---------------|
| chr15:83725000-83725500   | 18 | 500000 | 6519 | mKIAA1672     |
| chr8:27272880-27273380    | 18 | 3745   | 4446 | Thap1         |
| chr11:102304760-102305260 | 18 | 3431   | 3966 | BC025575      |
| chr19:61300095-61300595   | 18 | 651    | 3916 | Csf2ra        |
| chr10:61946780-61947280   | 18 | 2006   | 2315 | Vps26a        |
| chr2:174111520-174112020  | 18 | 48     | 1950 | Gnas          |
| chr5:139232690-139233190  | 18 | 889    | 1887 | BC004044      |
| chr19:3769630-3770130     | 18 | 778    | 1859 | Suv420h1      |
| chr1:157587265-157587765  | 18 | 732    | 1641 | Lhx4          |
| chr5:31480635-31481135    | 18 | 1062   | 1631 | Gtf3c2        |
| chr12:117317480-117317980 | 18 | 1277   | 1465 | Vipr2         |
| chr11:72301780-72302280   | 18 | 317    | 1391 | BC011467      |
| chr4:150481050-150481550  | 18 | 432    | 1262 | mKIAA0833     |
| chr14:104865720-104866220 | 18 | 6326   | 1245 | Pou4f1        |
| chr11:120098990-120099490 | 18 | 0      | 1228 | Bahcc1        |
| chr11:102806315-102806815 | 18 | 651    | 1209 | C1ql1         |
| chr9:58672235-58672735    | 18 | 512    | 1167 | Hcn4          |
| chr3:104443465-104443965  | 18 | 353    | 1125 | Slc16a1       |
| chr12:81536175-81536675   | 18 | 0      | 1100 | Wdr22         |
| chr7:28192860-28193360    | 18 | 138    | 1084 | Spnb4         |
| chr11:5343540-5344040     | 18 | 173    | 1059 | Znrf3         |
| chr11:119407910-119408410 | 18 | 46     | 973  | Nptx1         |
| chr15:39030595-39031095   | 18 | 132    | 968  | Rims2         |
| chr2:180068200-180068700  | 18 | 0      | 927  | Gata5         |
| chr9:121629200-121629700  | 18 | 280    | 923  | Nktr          |
| chr5:139677205-139677705  | 18 | 226    | 832  | Unc84a        |
| chr10:77085610-77086110   | 18 | 252    | 795  | Ube2g2        |
| chr11:119464840-119465340 | 18 | 63     | 782  | 4932417H02Rik |
| chr2:27533250-27533750    | 18 | 51     | 780  | Rxra          |
| chrX:166423840-166424340  | 18 | 978    | 780  | AK019053      |
| chr3:68809360-68809860    | 18 | 0      | 717  | Smc4          |
| chr15:58654020-58654520   | 18 | 0      | 711  | Tmem65        |
| chr7:4609600-4610100      | 18 | 188    | 701  | Saps1         |
| chr12:101758085-101758585 | 18 | 186    | 666  | AK046740      |
| chr13:13683090-13683590   | 18 | 69     | 665  | Lyst          |
| chr19:45308810-45309310   | 18 | 0      | 665  | Lbx1          |
| chr3:152330220-152330720  | 18 | 107    | 633  | Ak5           |
| chr19:38198420-38198920   | 18 | 305    | 627  | Rbp4          |
| chr4:154865845-154866345  | 18 | 0      | 623  | Gnb1          |
| chr5:123228560-123229060  | 18 | 80     | 597  | Camkk2        |
| chr12:31950520-31951020   | 18 | 0      | 590  | Lamb1-1       |
| chr10:125403665-125404165 | 18 | 0      | 584  | Lrig3         |
| chr11:54600310-54600810   | 18 | 0      | 577  | Cdc42se2      |
| chr3:126300250-126300750  | 18 | 0      | 548  | Camk2d        |
| chr4:58924005-58924505    | 18 | 55     | 546  | AI314180      |
| chr2:77117865-77118365    | 18 | 61     | 533  | Sestd1        |



|                           |    |        |      |               |
|---------------------------|----|--------|------|---------------|
| chr12:35590890-35591390   | 18 | 227    | 508  | Hdrpa         |
| chr15:66117030-66117530   | 18 | 63     | 505  | Kcnq3         |
| chr1:135320060-135320560  | 18 | 0      | 478  | Sox13         |
| chr17:14416730-14417230   | 18 | 158    | 439  | Smoc2         |
| chr11:20012235-20012735   | 18 | 0      | 430  | Actr2         |
| chr6:43615530-43616030    | 18 | 500000 | 393  | Tpk1          |
| chr11:115280600-115281100 | 18 | 183    | 382  | Atp5h         |
| chr9:122481750-122482250  | 18 | 159    | 381  | AK079255      |
| chr6:117118710-117119210  | 18 | 0      | 380  | Cxcl12        |
| chr2:153117270-153117770  | 18 | 97     | 356  | Kif3b         |
| chr7:36370040-36370540    | 18 | 0      | 310  | Rgs9bp        |
| chr3:84283810-84284310    | 18 | 0      | 290  | 6330505N24Rik |
| chr4:33117760-33118260    | 18 | 0      | 287  | AK076922      |
| chr16:35363480-35363980   | 18 | 0      | 273  | Sec22a        |
| chr7:53965510-53966010    | 18 | 0      | 270  | Saal1         |
| chr17:71659790-71660290   | 18 | 0      | 264  | Emilin2       |
| chr15:6658365-6658865     | 18 | 0      | 233  | 4921505C17Rik |
| chr2:119063180-119063680  | 18 | 0      | 218  | Spint1        |
| chr2:65201620-65202120    | 18 | 500000 | 212  | 9330158F14Rik |
| chr19:4438885-4439385     | 18 | 37499  | 133  | AK048995      |
| chr16:64851785-64852285   | 18 | 0      | 125  | Cggbp1        |
| chr13:58907815-58908315   | 18 | 0      | 109  | Ntrk2         |
| chr11:4964760-4965260     | 18 | 11     | 86   | Gas2l1        |
| chr18:66450755-66451255   | 18 | 0      | 78   | AK138348      |
| chr6:120772410-120772910  | 18 | 0      | 42   | Atp6v1e1      |
| chr14:75415570-75416070   | 18 | 0      | -13  | 5031414D18Rik |
| chr1:162964190-162964690  | 18 | 95     | -26  | Zbtb37        |
| chr1:89051445-89051945    | 18 | 36     | -33  | Ecel1         |
| chr3:96397860-96398360    | 18 | 0      | -45  | Polr3gl       |
| chr10:98570470-98570970   | 18 | 345    | -51  | Galnt4        |
| chr14:55544580-55545080   | 18 | 0      | -80  | Efs           |
| chr2:57090775-57091275    | 18 | 30     | -107 | AK044432      |
| chr7:123174430-123174930  | 18 | 477    | -120 | Sox6          |
| chrX:130223250-130223750  | 18 | 0      | -120 | Pcdh19        |
| chr6:29222250-29222750    | 18 | 6      | -171 | 2310016C08Rik |
| chr17:35372685-35373185   | 18 | 545    | -176 | Nfkbil1       |
| chr6:146590650-146591150  | 18 | 0      | -200 | Med21         |
| chr6:84538605-84539105    | 18 | 125    | -224 | Cyp26b1       |
| chr5:64483640-64484140    | 18 | 198    | -298 | Pgm1          |
| chr9:8134360-8134860      | 18 | 36     | -317 | AK129341      |
| chr11:4848180-4848680     | 18 | 187    | -364 | Nefh          |
| chr11:6962875-6963375     | 18 | 573    | -366 | Adcy1         |
| chr16:11983555-11984055   | 18 | 51     | -400 | 2700045P11Rik |
| chr18:38369570-38370070   | 18 | 46     | -405 | Pcdh1         |
| chr5:123229580-123230080  | 18 | 106    | -423 | Camkk2        |
| chr11:74403850-74404350   | 18 | 181    | -441 | Garnl4        |

|                           |    |        |        |                    |
|---------------------------|----|--------|--------|--------------------|
| chr4:32050395-32050895    | 18 | 0      | -451   | Map3k7             |
| chr7:99889435-99889935    | 18 | 0      | -538   | Rab30              |
| chr4:131700690-131701190  | 18 | 298    | -540   | Oprd1              |
| chr11:4846700-4847200     | 18 | 49     | -573   | Ap1b1              |
| chr3:34548095-34548595    | 18 | 0      | -581   | Sox2               |
| chr15:97835440-97835940   | 18 | 366    | -615   | Col2a1             |
| chr2:70311990-70312490    | 18 | 1811   | -739   | Sp5                |
| chr10:86956910-86957410   | 18 | 462    | -756   | Ascl1              |
| chr10:79178355-79178855   | 18 | 401    | -773   | Hcn2               |
| chr15:7759980-7760480     | 18 | 0      | -780   | Gdnf               |
| chr1:90133635-90134135    | 18 | 31511  | -797   | AK133186           |
| chr10:45206775-45207275   | 18 | 352    | -825   | Lin28b             |
| chr17:30025430-30025930   | 18 | 295    | -854   | Mdga1              |
| chr11:115129280-115129780 | 18 | 947    | -974   | Grin2c             |
| chr19:26680525-26681025   | 18 | 0      | -984   | Smarca2            |
| chr15:78550000-78550500   | 18 | 943    | -1050  | Lrrc62             |
| chr15:79920175-79920675   | 18 | 1116   | -1338  | Syng1              |
| chr2:116945555-116946055  | 18 | 0      | -1380  | Spred1             |
| chrX:166407640-166408140  | 18 | 14966  | -2926  | Fxy                |
| chr1:173486125-173486625  | 18 | 500000 | -2948  | Cd244              |
| chr11:55424030-55424530   | 18 | 500000 | -2989  | Gira1              |
| chr8:124423640-124424140  | 18 | 6800   | -3426  | 4F2 Ic             |
| chr2:165217040-165217540  | 18 | 3457   | -3532  | Zfp334             |
| chr2:74501350-74501850    | 18 | 3639   | -4125  | Evx2               |
| chr15:101789180-101789680 | 18 | 18375  | -4713  | Krt78              |
| chr15:102792150-102792650 | 18 | 4532   | -4895  | Hoxc10             |
| chr1:173484040-173484540  | 18 | 500000 | -5033  | Cd244              |
| chr18:25219180-25219680   | 18 | 500000 | -5287  | Fhod3              |
| chr18:13105765-13106265   | 18 | 5550   | -5787  | Osbpl1a            |
| chr4:153544320-153544820  | 18 | 294    | -6583  | AK205032           |
| chr8:87305245-87305745    | 18 | 2625   | -7228  | Nfix               |
| chr4:138300540-138301040  | 18 | 500000 | -7709  | Ubx3               |
| chr1:90124790-90125290    | 18 | 22666  | -9642  | AK133186           |
| chr19:55237550-55238050   | 18 | 500000 | -17574 | Tectb              |
| chr5:24520220-24520720    | 18 | 500000 | -18900 | Prkag2             |
| chr11:98359405-98359905   | 18 | 40047  | -19847 | Ikzf3              |
| chr7:142932035-142932535  | 18 | 23887  | -24244 | Ki-67              |
| chr15:102576510-102577010 | 18 | 217    | -24261 | Calcoco1           |
| chr11:103966750-103967250 | 18 | 26838  | -27195 | Crhr1              |
| chr10:43958380-43958880   | 18 | 29352  | -29533 | Atg5               |
| chr11:50384925-50385425   | 18 | 30026  | -30411 | Adamts2            |
| chr4:145022150-145022650  | 18 | 31044  | -31712 | NR_002888          |
| chr1:23263100-23263600    | 18 | 0      | -35202 | CS444445           |
| chr4:145163870-145164370  | 18 | 2873   | -42900 | OTTMUSG00000010173 |
| chr10:57160820-57161320   | 18 | 44925  | -45221 | Hsf2               |
| chr1:91477605-91478105    | 18 | 0      | -46472 | Centg2             |

|                           |    |        |        |               |
|---------------------------|----|--------|--------|---------------|
| chr1:135410780-135411280  | 17 | 500000 | 500000 |               |
| chr2:19190690-19191190    | 17 | 500000 | 500000 |               |
| chr3:159411645-159412145  | 17 | 500000 | 500000 |               |
| chr4:31343125-31343625    | 17 | 500000 | 500000 |               |
| chr4:102128060-102128560  | 17 | 500000 | 500000 |               |
| chr4:146858160-146858660  | 17 | 40840  | 500000 |               |
| chr5:33772650-33773150    | 17 | 188    | 500000 |               |
| chr8:89479615-89480115    | 17 | 500000 | 500000 |               |
| chr8:94599870-94600370    | 17 | 500000 | 500000 |               |
| chr8:122948935-122949435  | 17 | 24613  | 500000 |               |
| chr9:115442395-115442895  | 17 | 500000 | 500000 |               |
| chr10:43146490-43146990   | 17 | 29341  | 500000 |               |
| chr10:95634690-95635190   | 17 | 500000 | 500000 |               |
| chr10:101472390-101472890 | 17 | 500000 | 500000 |               |
| chr11:21729930-21730430   | 17 | 500000 | 500000 |               |
| chr11:118428770-118429270 | 17 | 1373   | 500000 |               |
| chr12:54073305-54073805   | 17 | 500000 | 500000 |               |
| chr14:105144480-105144980 | 17 | 500000 | 500000 |               |
| chr15:36642595-36643095   | 17 | 500000 | 500000 |               |
| chr17:30840260-30840760   | 17 | 500000 | 500000 |               |
| chr17:88146530-88147030   | 17 | 649    | 500000 |               |
| chrX:5193870-5194370      | 17 | 500000 | 500000 |               |
| chr5:77785710-77786210    | 17 | 46080  | 46435  | Polr2b        |
| chr14:48138300-48138800   | 17 | 45698  | 46315  | Fbxo34        |
| chr17:23570360-23570860   | 17 | 500000 | 45953  | EG619788      |
| chr4:145150930-145151430  | 17 | 15813  | 42345  | BC086318      |
| chr10:121117435-121117935 | 17 | 38545  | 38929  | D930020B18Rik |
| chr9:48340325-48340825    | 17 | 36546  | 37029  | EG434402      |
| chr3:122011045-122011545  | 17 | 14198  | 33964  | Dnttip2       |
| chr8:9942180-9942680      | 17 | 33690  | 33892  | Lig4          |
| chr5:101070485-101070985  | 17 | 32088  | 32534  | Coq2          |
| chr19:12081220-12081720   | 17 | 40574  | 29759  | Olfr1423      |
| chr6:56282485-56282985    | 17 | 500000 | 29569  | Pde1c         |
| chr5:115047505-115048005  | 17 | 13110  | 29496  | BC057022      |
| chr1:34808010-34808510    | 17 | 331    | 29492  | mKIAA11112    |
| chr4:108591630-108592130  | 17 | 39889  | 28986  | Rab3b         |
| chr16:85427970-85428470   | 17 | 500000 | 28329  | AK080982      |
| chr19:53302185-53302685   | 17 | 500000 | 27252  | AK005607      |
| chr9:58860410-58860910    | 17 | 22855  | 23587  | Neo1          |
| chr4:147845970-147846470  | 17 | 23244  | 23505  | Frap1         |
| chr9:122504785-122505285  | 17 | 23194  | 23416  | AK079255      |
| chr18:32173530-32174030   | 17 | 500000 | 22832  | Myo7b         |
| chr6:112874715-112875215  | 17 | 500000 | 22294  | Srgap3        |
| chr3:121844195-121844695  | 17 | 500000 | 21498  | Abca4         |
| chr11:75215865-75216365   | 17 | 42685  | 20009  | Serpinf1      |
| chr2:177892710-177893210  | 17 | 15609  | 16239  | Phactr3       |

|                           |    |        |       |               |
|---------------------------|----|--------|-------|---------------|
| chr8:108246530-108247030  | 17 | 14736  | 14590 | 4933405L10Rik |
| chr11:74191335-74191835   | 17 | 500000 | 13413 | Olfra412      |
| chr10:126528240-126528740 | 17 | 0      | 12528 | Centg1        |
| chr8:108244290-108244790  | 17 | 12496  | 12350 | 4933405L10Rik |
| chr1:90120090-90120590    | 17 | 17966  | 11807 | Ugt1a1        |
| chr13:113825350-113825850 | 17 | 0      | 10995 | 2310016C16Rik |
| chr1:90162420-90162920    | 17 | 11118  | 10089 | A730008H23Rik |
| chr4:151722335-151722835  | 17 | 9362   | 9826  | Chd5          |
| chr14:69780210-69780710   | 17 | 12237  | 9439  | AK007038      |
| chr13:95654175-95654675   | 17 | 0      | 8844  | Otp           |
| chr17:56642990-56643490   | 17 | 7481   | 8665  | Znrf4         |
| chr13:55573250-55573750   | 17 | 0      | 7832  | Prr7          |
| chr4:146981540-146982040  | 17 | 500000 | 7747  | 2610305D13Rik |
| chr1:173495650-173496150  | 17 | 500000 | 6577  | Cd244         |
| chr4:62174320-62174820    | 17 | 6058   | 6357  | Alad          |
| chr4:146983850-146984350  | 17 | 500000 | 5437  | 2610305D13Rik |
| chr1:157583910-157584410  | 17 | 0      | 4996  | Lhx4          |
| chr10:92293920-92294420   | 17 | 500000 | 4920  | BC065048      |
| chr8:74030680-74031180    | 17 | 552    | 4699  | Plvap         |
| chr12:54354060-54354560   | 17 | 0      | 4647  | Npas3         |
| chr2:130727280-130727780  | 17 | 4473   | 4584  | AK042707      |
| chr15:76347750-76348250   | 17 | 11     | 4558  | Scrt1         |
| chr5:140388040-140388540  | 17 | 39     | 4394  | A930017N06Rik |
| chr4:146985050-146985550  | 17 | 500000 | 4237  | 2610305D13Rik |
| chr9:40685955-40686455    | 17 | 0      | 3996  | Bsx           |
| chr8:74031690-74032190    | 17 | 0      | 3689  | Plvap         |
| chr11:89159430-89159930   | 17 | 0      | 3653  | Nog           |
| chr5:148003365-148003865  | 17 | 1770   | 3344  | Gsx1          |
| chr10:11066315-11066815   | 17 | 2955   | 3323  | Epm2a         |
| chr17:13743395-13743895   | 17 | 500000 | 3312  | BC068229      |
| chr6:38583730-38584230    | 17 | 2368   | 3258  | Klrg2         |
| chr4:62177775-62178275    | 17 | 2603   | 2902  | Alad          |
| chr7:16897480-16897980    | 17 | 0      | 2744  | Bbc3          |
| chr1:90111025-90111525    | 17 | 8901   | 2742  | Ugt1a1        |
| chr10:28866185-28866685   | 17 | 42     | 2634  | 6330407J23Rik |
| chr10:78993745-78994245   | 17 | 2122   | 2491  | Ppap2c        |
| chr11:74180400-74180900   | 17 | 500000 | 2478  | Olfra412      |
| chr1:121316200-121316700  | 17 | 421    | 2374  | Inhbb         |
| chrX:99444645-99445145    | 17 | 491    | 2212  | Cited1        |
| chr3:95121130-95121630    | 17 | 1766   | 2207  | Lass2         |
| chr12:84826595-84827095   | 17 | 0      | 1812  | Dpf3          |
| chr15:101782660-101783160 | 17 | 24895  | 1807  | Krt78         |
| chr7:26473570-26474070    | 17 | 512    | 1800  | Tgfb1         |
| chr5:103959920-103960420  | 17 | 500000 | 1586  | Ptpn13        |
| chr4:141092785-141093285  | 17 | 0      | 1476  | Spen          |
| chr4:151501350-151501850  | 17 | 846    | 1433  | Espn          |

|                           |    |       |      |               |
|---------------------------|----|-------|------|---------------|
| chr13:49241735-49242235   | 17 | 0     | 1397 | Wnk2          |
| chr11:105947220-105947720 | 17 | 905   | 1255 | Map3k3        |
| chr6:126594335-126594835  | 17 | 0     | 1233 | Kcna1         |
| chr2:126958215-126958715  | 17 | 901   | 1173 | Ncaph         |
| chr18:10726530-10727030   | 17 | 147   | 1158 | Mib1          |
| chr7:35905210-35905710    | 17 | 0     | 1149 | Cebpa         |
| chr16:93684290-93684790   | 17 | 465   | 1077 | Cbr3          |
| chr3:116125685-116126185  | 17 | 184   | 1014 | Cdc14a        |
| chr7:19864190-19864690    | 17 | 73    | 957  | C79127        |
| chr6:29686195-29686695    | 17 | 0     | 943  | Smo           |
| chr19:59419095-59419595   | 17 | 0     | 924  | Pdzd8         |
| chr5:132013400-132013900  | 17 | 0     | 906  | Auts2         |
| chr8:118229620-118230120  | 17 | 0     | 901  | Maf           |
| chr3:61169050-61169550    | 17 | 0     | 872  | Rap2b         |
| chr3:105255835-105256335  | 17 | 97    | 838  | Kcnd3         |
| chr4:104781415-104781915  | 17 | 366   | 808  | Prkaa2        |
| chr14:13177325-13177825   | 17 | 0     | 766  | Fezf2         |
| chr19:43516210-43516710   | 17 | 302   | 760  | Cnnm1         |
| chr5:23958495-23958995    | 17 | 4950  | 751  | Centg3        |
| chr19:46391390-46391890   | 17 | 440   | 738  | Psd           |
| chr8:91045750-91046250    | 17 | 311   | 732  | Nkd1          |
| chr19:12670080-12670580   | 17 | 15    | 725  | AK039403      |
| chr5:72894490-72894990    | 17 | 155   | 706  | Corin         |
| chr8:4324160-4324660      | 17 | 27    | 689  | Elavl1        |
| chr5:54390245-54390745    | 17 | 91    | 687  | Stim2         |
| chr10:76880095-76880595   | 17 | 170   | 672  | Adarb1        |
| chr18:60907190-60907690   | 17 | 828   | 633  | Ndst1         |
| chr2:154483140-154483640  | 17 | 139   | 629  | Chmp4b        |
| chr12:113369500-113370000 | 17 | 430   | 613  | CS444510      |
| chr4:88367555-88368055    | 17 | 0     | 606  | Klhl9         |
| chr5:140020195-140020695  | 17 | 0     | 594  | Uncx4         |
| chr7:137690020-137690520  | 17 | 52    | 592  | Nsmce4a       |
| chr10:24431080-24431580   | 17 | 181   | 577  | Enpp1         |
| chr7:87406430-87406930    | 17 | 276   | 575  | fi58gm        |
| chr3:138737350-138737850  | 17 | 0     | 562  | Rap1gds1      |
| chr9:72833680-72834180    | 17 | 31    | 546  | Ccpg1         |
| chr10:45297980-45298480   | 17 | 0     | 536  | Hace1         |
| chr4:122513765-122514265  | 17 | 49052 | 531  | Ppt1          |
| chr11:117128045-117128545 | 17 | 246   | 530  | Sept9         |
| chr14:68742330-68742830   | 17 | 0     | 480  | Nefm          |
| chr3:33699345-33699845    | 17 | 85    | 479  | Ttc14         |
| chr6:42273860-42274360    | 17 | 186   | 468  | 6330503C03Rik |
| chr3:102274055-102274555  | 17 | 3     | 455  | Ngfb          |
| chr19:9969270-9969770     | 17 | 4242  | 440  | Incenp        |
| chr9:121552000-121552500  | 17 | 22    | 417  | Vipr1         |
| chr4:153331495-153331995  | 17 | 52    | 400  | A430005L14Rik |

|                           |    |       |      |               |
|---------------------------|----|-------|------|---------------|
| chr15:87455795-87456295   | 17 | 0     | 386  | AW049604      |
| chr4:114581990-114582490  | 17 | 75    | 379  | AK078937      |
| chr5:121834960-121835460  | 17 | 86    | 369  | Trafd1        |
| chr4:131699790-131700290  | 17 | 10    | 360  | Oprd1         |
| chr5:116872275-116872775  | 17 | 22018 | 347  | Hspb8         |
| chr12:74146855-74147355   | 17 | 0     | 345  | Six1          |
| chr12:72075770-72076270   | 17 | 0     | 341  | Psma3         |
| chr15:82105785-82106285   | 17 | 390   | 334  | Sept3         |
| chr9:114472910-114473410  | 17 | 0     | 326  | Trim71        |
| chr1:136456845-136457345  | 17 | 0     | 324  | Jarid1b       |
| chr13:46822385-46822885   | 17 | 0     | 320  | Nup153        |
| chr8:97219585-97220085    | 17 | 0     | 306  | Plip          |
| chr6:84538110-84538610    | 17 | 274   | 271  | Cyp26b1       |
| chr5:107718020-107718520  | 17 | 0     | 268  | Tgfbr3        |
| chr5:72950320-72950820    | 17 | 0     | 267  | Nfxl1         |
| chr11:116393790-116394290 | 17 | 0     | 267  | Sphk1         |
| chr7:25084055-25084555    | 17 | 0     | 262  | Zfp61         |
| chr8:97361430-97361930    | 17 | 242   | 261  | Ciapin1       |
| chr1:183140990-183141490  | 17 | 0     | 260  | Wdr26         |
| chr15:78872350-78872850   | 17 | 495   | 243  | Galr3         |
| chr1:38054820-38055320    | 17 | 0     | 216  | Eif5b         |
| chr16:57549320-57549820   | 17 | 0     | 215  | 4631422O05Rik |
| chr3:58329230-58329730    | 17 | 0     | 195  | D3Ucla1       |
| chr4:82150560-82151060    | 17 | 0     | 194  | Nfib          |
| chr4:116299665-116300165  | 17 | 0     | 186  | Nasp          |
| chr12:106247590-106248090 | 17 | 0     | 178  | 4831426119Rik |
| chr12:88812860-88813360   | 17 | 0     | 138  | Snw1          |
| chr11:98843945-98844445   | 17 | 0     | 134  | Gjc1          |
| chr17:24625610-24626110   | 17 | 0     | 133  | Caskin1       |
| chr9:77961095-77961595    | 17 | 0     | 130  | Ick           |
| chr16:72663260-72663760   | 17 | 0     | 117  | Robo1         |
| chr9:110782220-110782720  | 17 | 0     | 116  | Tmie          |
| chr11:101414030-101414530 | 17 | 990   | 109  | Nbr1          |
| chr3:55987285-55987785    | 17 | 0     | 87   | nbea          |
| chr17:34258360-34258860   | 17 | 0     | 81   | Brd2          |
| chr12:73185990-73186490   | 17 | 0     | 59   | 2810055F11Rik |
| chr2:19580270-19580770    | 17 | 0     | 48   | AK188320      |
| chr5:143996665-143997165  | 17 | 0     | 29   | Zfp12         |
| chr11:53583355-53583855   | 17 | 0     | 26   | Irf1          |
| chr11:3352220-3352720     | 17 | 0     | -4   | AK018450      |
| chr11:74537940-74538440   | 17 | 0     | -19  | Pafah1b1      |
| chr4:21612900-21613400    | 17 | 147   | -41  | Prdm13        |
| chr5:149364170-149364670  | 17 | 0     | -56  | Ubl3          |
| chr4:32886875-32887375    | 17 | 0     | -114 | Lym2          |
| chr10:62706760-62707260   | 17 | 0     | -115 | AK018967      |
| chr12:93024770-93025270   | 17 | 7368  | -145 | Ston2         |

|                           |    |        |       |               |
|---------------------------|----|--------|-------|---------------|
| chr6:83027915-83028415    | 17 | 0      | -218  | Pcgf1         |
| chr19:57082685-57083185   | 17 | 0      | -230  | AK158196      |
| chr15:82104880-82105380   | 17 | 243    | -234  | Sept3         |
| chr12:82731855-82732355   | 17 | 139    | -250  | Ttc9          |
| chr7:54175305-54175805    | 17 | 0      | -256  | Tsg101        |
| chr3:88139640-88140140    | 17 | 62     | -291  | Smg5          |
| chr2:31939275-31939775    | 17 | 0      | -301  | A130092J06Rik |
| chr2:26998045-26998545    | 17 | 180    | -302  | C630035N08Rik |
| chr4:45839770-45840270    | 17 | 299    | -322  | Igfbpl1       |
| chr9:102407865-102408365  | 17 | 108    | -352  | Ky            |
| chr4:130347820-130348320  | 17 | 196    | -381  | Sdc3          |
| chr9:30749515-30750015    | 17 | 340    | -382  | Adamts8       |
| chr15:80117015-80117515   | 17 | 289    | -402  | Cacna1i       |
| chr12:72931410-72931910   | 17 | 422    | -404  | Daam1         |
| chr4:134707745-134708245  | 17 | 0      | -415  | Runx3         |
| chr3:129764015-129764515  | 17 | 260    | -441  | Sec24b        |
| chr3:28980785-28981285    | 17 | 276    | -463  | 6130401L20Rik |
| chr11:11926715-11927215   | 17 | 630    | -639  | Grb10         |
| chr11:4647210-4647710     | 17 | 471    | -680  | Cabp7         |
| chr15:97078165-97078665   | 17 | 147    | -698  | Amigo2        |
| chr10:81037325-81037825   | 17 | 342    | -701  | Tle2          |
| chr11:103634580-103635080 | 17 | 26     | -707  | Wnt3          |
| chr6:99641660-99642160    | 17 | 140    | -762  | Gpr27         |
| chr9:95459100-95459600    | 17 | 265    | -885  | Paqr9         |
| chr6:90411475-90411975    | 17 | 545    | -894  | Klf15         |
| chr4:136832345-136832845  | 17 | 102    | -954  | Wnt4          |
| chr16:90385400-90385900   | 17 | 328    | -991  | Hunk          |
| chr12:62624280-62624780   | 17 | 175    | -1088 | Lrfn5         |
| chr19:44830520-44831020   | 17 | 0      | -1113 | Pax2          |
| chr13:94073385-94073885   | 17 | 0      | -1118 | Homer1        |
| chr6:85136490-85136990    | 17 | 751    | -1184 | Emx1          |
| chr10:43297300-43297800   | 17 | 595    | -1424 | Cd24a         |
| chr5:75550485-75550985    | 17 | 1317   | -1455 | Pdgfra        |
| chr8:87122860-87123360    | 17 | 17865  | -2177 | Cacna1a       |
| chr13:29121770-29122270   | 17 | 500000 | -2242 | AK150110      |
| chr4:128379705-128380205  | 17 | 24620  | -2286 | Phc2          |
| chr1:173505545-173506045  | 17 | 500000 | -3398 | 2b4           |
| chr4:41590665-41591165    | 17 | 3643   | -3581 | 2310040A07Rik |
| chr4:62166870-62167370    | 17 | 3776   | -3887 | Hdhd3         |
| chr3:96374430-96374930    | 17 | 12804  | -3957 | AK143784      |
| chr15:74389680-74390180   | 17 | 4407   | -4072 | Bai1          |
| chr3:93624655-93625155    | 17 | 500000 | -5036 | Tdpoz3        |
| chr4:41592655-41593155    | 17 | 5633   | -5571 | 2310040A07Rik |
| chr15:12499060-12499560   | 17 | 500000 | -6139 | AK195788      |
| chr2:167475040-167475540  | 17 | 11506  | -6590 | AK177731      |
| chr8:86636635-86637135    | 17 | 17732  | -8225 | BC057552      |

|                           |    |        |        |               |
|---------------------------|----|--------|--------|---------------|
| chr15:12495610-12496110   | 17 | 500000 | -9589  | AK195788      |
| chr19:3312935-3313435     | 17 | 10153  | -10162 | Cpt1a         |
| chr15:89388290-89388790   | 17 | 0      | -10216 | Acr           |
| chr1:90184740-90185240    | 17 | 10712  | -10859 | A730008H23Rik |
| chr3:136992805-136993305  | 17 | 500000 | -11051 | Emcn          |
| chr2:101867570-101868070  | 17 | 30894  | -11965 | AK079670      |
| chr11:117460140-117460640 | 17 | 500000 | -12268 | AK019332      |
| chr17:23835405-23835905   | 17 | 1094   | -14671 | Cldn9         |
| chr7:20058950-20059450    | 17 | 105    | -15358 | Mark4         |
| chr2:31509955-31510455    | 17 | 0      | -16051 | Exosc2        |
| chr18:39429840-39430340   | 17 | 500000 | -16090 | mKIAA0621     |
| chr11:6636050-6636550     | 17 | 500000 | -16261 | AK076664      |
| chr8:128240575-128241075  | 17 | 17202  | -17303 | 2310079N02Rik |
| chr11:115720340-115720840 | 17 | 0      | -20960 | Myo15b        |
| chr3:28138595-28139095    | 17 | 22616  | -23290 | AK039113      |
| chr4:146709890-146710390  | 17 | 500000 | -25276 | AK145533      |
| chr17:47175830-47176330   | 17 | 28598  | -28639 | Ubr2          |
| chr9:96560460-96560960    | 17 | 28717  | -28756 | gap1m         |
| chr2:31496660-31497160    | 17 | 0      | -29346 | Exosc2        |
| chr17:85978685-85979185   | 17 | 28540  | -34012 | Six3          |
| chr1:183808705-183809205  | 17 | 36071  | -36493 | Lbr           |
| chr9:77442615-77443115    | 17 | 500000 | -41673 | Klhl31        |
| chr8:48957400-48957900    | 17 | 500000 | -44473 | BC040690      |
| chr11:18964090-18964590   | 17 | 36726  | -45658 | Meis1         |
| chr18:77496345-77496845   | 17 | 3051   | -49893 | Loxhd1        |
| chr1:5906770-5907270      | 16 | 0      | 500000 |               |
| chr1:181251030-181251530  | 16 | 500000 | 500000 |               |
| chr2:28150760-28151260    | 16 | 500000 | 500000 |               |
| chr2:164937310-164937810  | 16 | 0      | 500000 |               |
| chr3:6115990-6116490      | 16 | 500000 | 500000 |               |
| chr3:68672805-68673305    | 16 | 24     | 500000 |               |
| chr3:78705905-78706405    | 16 | 500000 | 500000 |               |
| chr3:143286310-143286810  | 16 | 500000 | 500000 |               |
| chr4:31107835-31108335    | 16 | 500000 | 500000 |               |
| chr4:105928370-105928870  | 16 | 500000 | 500000 |               |
| chr6:118272650-118273150  | 16 | 500000 | 500000 |               |
| chr8:11967800-11968300    | 16 | 500000 | 500000 |               |
| chr8:86899545-86900045    | 16 | 38366  | 500000 |               |
| chr9:62280420-62280920    | 16 | 500000 | 500000 |               |
| chr10:22794860-22795360   | 16 | 500000 | 500000 |               |
| chr10:29725125-29725625   | 16 | 500000 | 500000 |               |
| chr10:95129440-95129940   | 16 | 500000 | 500000 |               |
| chr10:109892320-109892820 | 16 | 94     | 500000 |               |
| chr10:126185350-126185850 | 16 | 500000 | 500000 |               |
| chr11:35859205-35859705   | 16 | 1270   | 500000 |               |
| chr13:85266435-85266935   | 16 | 500000 | 500000 |               |



|                           |    |        |        |                    |
|---------------------------|----|--------|--------|--------------------|
| chr14:10101630-10102130   | 16 | 500000 | 500000 |                    |
| chr14:33741870-33742370   | 16 | 500000 | 500000 |                    |
| chr14:38400050-38400550   | 16 | 500000 | 500000 |                    |
| chr14:59472880-59473380   | 16 | 500000 | 500000 |                    |
| chr15:36643570-36644070   | 16 | 500000 | 500000 |                    |
| chr16:96787705-96788205   | 16 | 500000 | 500000 |                    |
| chr17:48874290-48874790   | 16 | 500000 | 500000 |                    |
| chr17:49333335-49333835   | 16 | 500000 | 500000 |                    |
| chr17:86303660-86304160   | 16 | 500000 | 500000 |                    |
| chr18:81513160-81513660   | 16 | 500000 | 500000 |                    |
| chr10:74918440-74918940   | 16 | 500000 | 48912  | Upb1               |
| chr5:14872360-14872860    | 16 | 500000 | 42278  | ENSMUSG00000033219 |
| chr7:82412155-82412655    | 16 | 41324  | 40792  | Sv2b               |
| chr18:80492825-80493325   | 16 | 0      | 40027  | Pqlc1              |
| chr11:97396620-97397120   | 16 | 278    | 39569  | P140               |
| chr13:50018250-50018750   | 16 | 500000 | 31166  | DQ690487           |
| chr11:60197220-60197720   | 16 | 30849  | 30589  | Lrrc48             |
| chr12:81330650-81331150   | 16 | 29424  | 30402  | Actn1              |
| chr19:12080595-12081095   | 16 | 39949  | 29340  | Osbp               |
| chr4:146961000-146961500  | 16 | 500000 | 28287  | 2610305D13Rik      |
| chrX:106317940-106318440  | 16 | 500000 | 27445  | Sh3bgrl            |
| chr8:90114995-90115495    | 16 | 500000 | 27440  | 4933402J07Rik      |
| chr1:58670590-58671090    | 16 | 27569  | 27398  | Ndufb3             |
| chr10:90318050-90318550   | 16 | 25654  | 25713  | Anks1b             |
| chr17:35754895-35755395   | 16 | 49175  | 25494  | Dpcr1              |
| chr4:128710300-128710800  | 16 | 15329  | 24676  | AK019743           |
| chr12:113619535-113620035 | 16 | 500000 | 24237  | AK054515           |
| chr15:89353560-89354060   | 16 | 565    | 22097  | Shank3             |
| chr4:134508330-134508830  | 16 | 21196  | 21686  | Syf2               |
| chr16:13447420-13447920   | 16 | 478    | 21177  | AK131759           |
| chr17:35759420-35759920   | 16 | 44650  | 20969  | Dpcr1              |
| chr6:91236470-91236970    | 16 | 1005   | 20848  | Fbln2              |
| chr4:41566340-41566840    | 16 | 20368  | 20744  | 2310040A07Rik      |
| chr4:45715050-45715550    | 16 | 500000 | 18840  | Gm829              |
| chr8:95921445-95921945    | 16 | 500000 | 18639  | DQ704652           |
| chr1:90152870-90153370    | 16 | 20668  | 18438  | AK133186           |
| chr14:35383555-35384055   | 16 | 20990  | 17987  | Ldb3               |
| chr17:24193850-24194350   | 16 | 15948  | 16303  | Kctd5              |
| chr15:100607645-100608145 | 16 | 8661   | 15718  | Slc4a8             |
| chr11:74193170-74193670   | 16 | 500000 | 15248  | Olfr412            |
| chr13:55917700-55918200   | 16 | 8889   | 14835  | Pitx1              |
| chr4:139374875-139375375  | 16 | 1939   | 13757  | Pax7               |
| chr1:183684370-183684870  | 16 | 500000 | 13454  | A230079K17Rik      |
| chr8:87634200-87634700    | 16 | 27039  | 12543  | Zfp791             |
| chr4:146978035-146978535  | 16 | 500000 | 11252  | 2610305D13Rik      |
| chr17:30702490-30702990   | 16 | 9826   | 10373  | Btbd9              |

|                           |    |        |      |               |
|---------------------------|----|--------|------|---------------|
| chr11:74187150-74187650   | 16 | 500000 | 9228 | Olfr412       |
| chr13:45624460-45624960   | 16 | 21573  | 8490 | Gmpr          |
| chr2:93816390-93816890    | 16 | 27     | 8305 | Alkbh3        |
| chr8:91151560-91152060    | 16 | 0      | 8216 | 9130017C17Rik |
| chr5:120889630-120890130  | 16 | 0      | 7971 | Lhx5          |
| chr1:75483780-75484280    | 16 | 181    | 7876 | A230078I05Rik |
| chr1:90115825-90116325    | 16 | 13701  | 7542 | Ugt1a1        |
| chr4:44715605-44716105    | 16 | 141    | 7456 | Pax5          |
| chr5:139793915-139794415  | 16 | 6781   | 7252 | Centa1        |
| chr15:98823300-98823800   | 16 | 46     | 7155 | AK016307      |
| chr5:150249170-150249670  | 16 | 500000 | 7140 | 4930588N13Rik |
| chr17:25382370-25382870   | 16 | 5082   | 5477 | 0610007P22Rik |
| chr11:102303260-102303760 | 16 | 3319   | 5466 | BC025575      |
| chr11:84724620-84725120   | 16 | 4793   | 4987 | Znhit3        |
| chr15:99060010-99060510   | 16 | 4966   | 4854 | Kcnh3         |
| chr19:44834960-44835460   | 16 | 1400   | 3327 | Pax2          |
| chr1:157585615-157586115  | 16 | 754    | 3291 | Lhx4          |
| chr15:60653070-60653570   | 16 | 1205   | 3194 | BC020326      |
| chr9:24952760-24953260    | 16 | 2579   | 3064 | Herpud2       |
| chr4:62160010-62160510    | 16 | 2806   | 2973 | Hdhd3         |
| chr8:97511070-97511570    | 16 | 500000 | 2818 | Gpr56         |
| chr5:24603630-24604130    | 16 | 1507   | 2367 | Prkag2        |
| chr9:114471015-114471515  | 16 | 133    | 2221 | Trim71        |
| chr4:62160820-62161320    | 16 | 1996   | 2163 | Hdhd3         |
| chr11:32188850-32189350   | 16 | 21368  | 2137 | F830116E18Rik |
| chr11:120048910-120049410 | 16 | 126    | 2009 | AK164256      |
| chr8:94323240-94323740    | 16 | 94     | 1782 | Irx3          |
| chr9:102409920-102410420  | 16 | 1369   | 1703 | Ky            |
| chr9:69046680-69047180    | 16 | 500000 | 1616 | Rora          |
| chr1:39632385-39632885    | 16 | 735    | 1614 | Rnf149        |
| chr1:74903010-74903510    | 16 | 217    | 1589 | Cdk5r2        |
| chr3:121949560-121950060  | 16 | 622    | 1301 | Gclm          |
| chr8:17533895-17534395    | 16 | 572    | 1239 | Csmd1         |
| chr10:53098205-53098705   | 16 | 603    | 1201 | AK039734      |
| chr2:103811260-103811760  | 16 | 441    | 1131 | Lmo2          |
| chr8:95199160-95199660    | 16 | 767    | 1110 | Irx6          |
| chr9:51856905-51857405    | 16 | 36     | 1110 | Rdx           |
| chr10:127897145-127897645 | 16 | 480    | 1046 | Smarcc2       |
| chr9:114472210-114472710  | 16 | 0      | 1026 | Trim71        |
| chr7:148109050-148109550  | 16 | 488    | 992  | Nlrp6         |
| chr4:124335610-124336110  | 16 | 0      | 972  | Pou3f1        |
| chr2:131318390-131318890  | 16 | 350    | 962  | Smox          |
| chr16:76372100-76372600   | 16 | 177    | 943  | Nrip1         |
| chr9:56843465-56843965    | 16 | 69     | 941  | Ptpn9         |
| chr9:107436960-107437460  | 16 | 76     | 935  | Tmem115       |
| chr6:52209740-52210240    | 16 | 0      | 883  | Hoxa13        |

|                           |    |      |     |               |
|---------------------------|----|------|-----|---------------|
| chr15:8393370-8393870     | 16 | 2    | 842 | Nipbl         |
| chr15:75811320-75811820   | 16 | 308  | 842 | 2410075B13Rik |
| chr6:126689120-126689620  | 16 | 0    | 841 | Kcna6         |
| chr9:100544590-100545090  | 16 | 0    | 799 | Stag1         |
| chr12:3427415-3427915     | 16 | 0    | 782 | Asxl2         |
| chr7:133224900-133225400  | 16 | 0    | 774 | AK082731      |
| chr2:153269200-153269700  | 16 | 0    | 763 | 8430427H17Rik |
| chr8:72840230-72840730    | 16 | 501  | 752 | Lass1         |
| chr4:155570610-155571110  | 16 | 0    | 736 | Agrn          |
| chr4:132088870-132089370  | 16 | 90   | 729 | Atpif1        |
| chr2:130522280-130522780  | 16 | 108  | 724 | Slc4a11       |
| chr8:91567110-91567610    | 16 | 0    | 700 | Sall1         |
| chr1:54250930-54251430    | 16 | 6    | 697 | Hecw2         |
| chr11:120094655-120095155 | 16 | 0    | 645 | Bahcc1        |
| chr4:135576680-135577180  | 16 | 130  | 633 | Tceb3         |
| chr10:98571110-98571610   | 16 | 985  | 589 | Galnt4        |
| chr1:166387655-166388155  | 16 | 0    | 580 | Atp1b1        |
| chr11:75007805-75008305   | 16 | 0    | 561 | Rtn4rl1       |
| chr8:114377410-114377910  | 16 | 2    | 549 | Cfdp1         |
| chr11:103994480-103994980 | 16 | 0    | 535 | Crhr1         |
| chr6:72184790-72185290    | 16 | 0    | 530 | Atoh8         |
| chr10:4522860-4523360     | 16 | 56   | 513 | Mtrf1l        |
| chr4:149656270-149656770  | 16 | 693  | 496 | Rere          |
| chr12:81620220-81620720   | 16 | 0    | 494 | Galnt1l       |
| chr4:115500935-115501435  | 16 | 126  | 489 | Mobkl2c       |
| chr2:172765070-172765570  | 16 | 0    | 473 | Bmp7          |
| chr14:55544030-55544530   | 16 | 410  | 470 | Efs           |
| chr14:41779380-41779880   | 16 | 0    | 465 | Tspan14       |
| chr2:128644250-128644750  | 16 | 230  | 462 | Tmem87b       |
| chr6:149049490-149049990  | 16 | 0    | 461 | D030011O10Rik |
| chr2:146839000-146839500  | 16 | 0    | 455 | Xrn2          |
| chr11:112643740-112644240 | 16 | 0    | 453 | Sox9          |
| chr9:121904440-121904940  | 16 | 92   | 403 | C85492        |
| chr15:31460140-31460640   | 16 | 0    | 401 | March6        |
| chr11:71565015-71565515   | 16 | 91   | 388 | BC030477      |
| chr9:42913175-42913675    | 16 | 84   | 375 | Arhgef12      |
| chr1:164501070-164501570  | 16 | 0    | 362 | Vamp4         |
| chr5:29895885-29896385    | 16 | 0    | 354 | Ube3c         |
| chr7:82600850-82601350    | 16 | 0    | 347 | Akap13        |
| chr19:4926470-4926970     | 16 | 1514 | 338 | Dpp3          |
| chr8:73284250-73284750    | 16 | 57   | 319 | BC051227      |
| chr7:127986460-127986960  | 16 | 0    | 314 | Eef2k         |
| chr13:31650360-31650860   | 16 | 0    | 305 | Foxq1         |
| chr17:27340150-27340650   | 16 | 126  | 292 | Lemd2         |
| chr6:71093830-71094330    | 16 | 0    | 289 | Thnsl2        |
| chr5:34338660-34339160    | 16 | 0    | 278 | Nat8l         |

|                           |    |        |      |               |
|---------------------------|----|--------|------|---------------|
| chr1:165924390-165924890  | 16 | 0      | 271  | BC055324      |
| chr15:102784960-102785460 | 16 | 0      | 254  | Hoxc11        |
| chr10:126602910-126603410 | 16 | 0      | 246  | B4galnt1      |
| chr4:126413020-126413520  | 16 | 0      | 242  | Tcfap2e       |
| chr10:22451260-22451760   | 16 | 0      | 228  | Tbpl1         |
| chr1:180267415-180267915  | 16 | 0      | 177  | Hnrnpu        |
| chr6:52195345-52195845    | 16 | 0      | 170  | Hoxa11        |
| chr8:72655130-72655630    | 16 | 0      | 149  | 2310073E15Rik |
| chr5:5379800-5380300      | 16 | 0      | 146  | Pftk1         |
| chr5:115584600-115585100  | 16 | 0      | 133  | Unc119b       |
| chr9:66440405-66440905    | 16 | 0      | 131  | Usp3          |
| chr1:162125250-162125750  | 16 | 0      | 110  | Mrps14        |
| chr9:14849590-14850090    | 16 | 0      | 81   | Panx1         |
| chr13:120217235-120217735 | 16 | 0      | 79   | Paip1         |
| chr1:183668935-183669435  | 16 | 500000 | 67   | A230079K17Rik |
| chr6:97160600-97161100    | 16 | 0      | 65   | Arl6ip5       |
| chr6:54942550-54943050    | 16 | 0      | 60   | A030007L17Rik |
| chr6:127100675-127101175  | 16 | 108    | 53   | AK187594      |
| chr14:21167020-21167520   | 16 | 40508  | 35   | Ecd           |
| chr6:126689935-126690435  | 16 | 0      | 26   | Kcna6         |
| chr4:124743700-124744200  | 16 | 0      | 14   | Snip1         |
| chr1:84931400-84931900    | 16 | 21     | 7    | Slc16a14      |
| chr11:77893610-77894110   | 16 | 0      | -14  | Eral1         |
| chr9:97011270-97011770    | 16 | 0      | -61  | Slc25a36      |
| chr14:60216610-60217110   | 16 | 2      | -80  | Cdadc1        |
| chr3:62142360-62142860    | 16 | 30     | -88  | 4631416L12Rik |
| chr3:7613270-7613770      | 16 | 355    | -94  | Ii7           |
| chr4:58925460-58925960    | 16 | 0      | -114 | AI314180      |
| chr2:119613120-119613620  | 16 | 0      | -123 | mKIAA1403     |
| chr9:63869040-63869540    | 16 | 0      | -163 | Smad6         |
| chr9:81756910-81757410    | 16 | 0      | -190 | 4930486G11Rik |
| chr8:34752400-34752900    | 16 | 66     | -203 | Ubx6          |
| chr17:43938320-43938820   | 16 | 145    | -229 | Rcan2         |
| chr5:111846695-111847195  | 16 | 0      | -240 | Mn1           |
| chr1:50983860-50984360    | 16 | 0      | -256 | Tmeff2        |
| chr8:123606950-123607450  | 16 | 0      | -269 | AK087264      |
| chr9:51976725-51977225    | 16 | 152    | -299 | mKIAA1726     |
| chr9:54798830-54799330    | 16 | 1      | -320 | AY074887      |
| chr4:107704770-107705270  | 16 | 113    | -326 | Podn          |
| chr12:99813415-99813915   | 16 | 76     | -329 | Kcnk10        |
| chr9:62384950-62385450    | 16 | 246    | -350 | Coro2b        |
| chrX:45807450-45807950    | 16 | 0      | -355 | Elf4          |
| chr11:120391460-120391960 | 16 | 155    | -380 | Gcgr          |
| chr11:89163465-89163965   | 16 | 0      | -382 | Nog           |
| chr8:98012860-98013360    | 16 | 500000 | -421 | Csnk2a2       |
| chr2:19368505-19369005    | 16 | 484    | -455 | AK053418      |

|                           |    |        |       |               |
|---------------------------|----|--------|-------|---------------|
| chr5:87175060-87175560    | 16 | 500000 | -479  | Tmprss11e     |
| chr6:72850210-72850710    | 16 | 47     | -488  | Kcmf1         |
| chr4:154417590-154418090  | 16 | 243    | -578  | Plch2         |
| chr9:119977745-119978245  | 16 | 41425  | -596  | Cx3cr1        |
| chr6:134741710-134742210  | 16 | 343    | -609  | Dusp16        |
| chr11:107656160-107656660 | 16 | 395    | -633  | Cacng4        |
| chr10:18563860-18564360   | 16 | 582    | -766  | Perp          |
| chr11:49837725-49838225   | 16 | 435    | -857  | Rnf130        |
| chr4:154229340-154229840  | 16 | 169    | -866  | B230396O12Rik |
| chr13:31718350-31718850   | 16 | 0      | -940  | AK142058      |
| chr11:69615970-69616470   | 16 | 1085   | -950  | Tmem102       |
| chr10:94408015-94408515   | 16 | 65     | -1054 | Plxnc1        |
| chr8:73317150-73317650    | 16 | 771    | -1065 | mKIAA0561     |
| chr15:96116620-96117120   | 16 | 0      | -1082 | 1700124K17Rik |
| chr10:42895225-42895725   | 16 | 571    | -1140 | Sobp          |
| chr12:53704230-53704730   | 16 | 500000 | -1172 | AK006587      |
| chr13:53077340-53077840   | 16 | 381    | -1183 | Nfil3         |
| chr13:55049200-55049700   | 16 | 601    | -1342 | Unc5a         |
| chr14:55545870-55546370   | 16 | 312    | -1370 | Efs           |
| chr11:120520490-120520990 | 16 | 428    | -1383 | Notum         |
| chr16:60606515-60607015   | 16 | 421    | -1409 | Epha6         |
| chr11:120096175-120096675 | 16 | 0      | -1587 | Bahcc1        |
| chr2:180625770-180626270  | 16 | 185    | -1603 | AK045142      |
| chr12:113382520-113383020 | 16 | 0      | -1648 | Kif26a        |
| chr9:106789760-106790260  | 16 | 202    | -1737 | Rbm15b        |
| chr6:124809290-124809790  | 16 | 1631   | -1836 | Leprel2       |
| chr4:120623615-120624115  | 16 | 110    | -1843 | Zfp69         |
| chr8:122384090-122384590  | 16 | 1754   | -1864 | BC025816      |
| chr2:130119480-130119980  | 16 | 744    | -1944 | Ebf4          |
| chr2:180626250-180626750  | 16 | 59     | -2083 | AK045142      |
| chr3:87801545-87802045    | 16 | 426    | -2171 | Bcan          |
| chr1:135553780-135554280  | 16 | 3434   | -2447 | Zc3h11a       |
| chr1:90176370-90176870    | 16 | 2342   | -2489 | A730008H23Rik |
| chr15:100523250-100523750 | 16 | 35919  | -2703 | AK028111      |
| chr12:118392780-118393280 | 16 | 311    | -3289 | AK138376      |
| chr1:173484750-173485250  | 16 | 500000 | -4323 | Cd244         |
| chr15:99050710-99051210   | 16 | 3192   | -4446 | Kcnh3         |
| chr6:48409825-48410325    | 16 | 14431  | -4572 | sco-spondin   |
| chr4:154421840-154422340  | 16 | 4493   | -4828 | Plch2         |
| chr2:127662715-127663215  | 16 | 5239   | -5433 | Bub1          |
| chr8:22158925-22159425    | 16 | 500000 | -6048 | Defcr21       |
| chr1:90179935-90180435    | 16 | 5907   | -6054 | A730008H23Rik |
| chr8:97227110-97227610    | 16 | 7145   | -7219 | Plip          |
| chr1:137941575-137942075  | 16 | 5573   | -7652 | Cacna1s       |
| chr15:101792140-101792640 | 16 | 15415  | -7673 | Krt78         |
| chr15:98529760-98530260   | 16 | 22098  | -8647 | Ccdc65        |

|                           |    |        |        |                    |
|---------------------------|----|--------|--------|--------------------|
| chr1:90190825-90191325    | 16 | 16797  | -8782  | Trpm8              |
| chr10:58929450-58929950   | 16 | 500000 | -8793  | Ccdc109a           |
| chr19:38784340-38784840   | 16 | 500000 | -13418 | Plce1              |
| chr15:82798440-82798940   | 16 | 4810   | -14609 | AK140580           |
| chrX:166440830-166441330  | 16 | 4814   | -16210 | AK019053           |
| chr11:81832540-81833040   | 16 | 500000 | -16288 | Ccl2               |
| chr17:74006795-74007295   | 16 | 500000 | -17486 | AK085353           |
| chr3:107517845-107518345  | 16 | 18455  | -18630 | Ahcy11             |
| chr1:91846775-91847275    | 16 | 8241   | -19275 | Gbx2               |
| chr12:85084915-85085415   | 16 | 27527  | -19445 | Papln              |
| chr4:146793630-146794130  | 16 | 12224  | -20093 | AK019745           |
| chr4:146794435-146794935  | 16 | 13029  | -20898 | AK019745           |
| chr1:91851500-91852000    | 16 | 12966  | -24000 | Gbx2               |
| chr1:167669280-167669780  | 16 | 24306  | -24380 | Creg1              |
| chr18:6087085-6087585     | 16 | 48179  | -25366 | Arhgap12           |
| chr4:153442050-153442550  | 16 | 13078  | -25515 | Ccdc27             |
| chr4:145026775-145027275  | 16 | 26419  | -27087 | NR_002888          |
| chr4:145025760-145026260  | 16 | 27434  | -28102 | NR_002888          |
| chr7:142936560-142937060  | 16 | 28412  | -28769 | Ki-67              |
| chr15:77166840-77167340   | 16 | 29411  | -29733 | Rbm9               |
| chr4:145023625-145024125  | 16 | 29569  | -30237 | NR_002888          |
| chr10:117035010-117035510 | 16 | 31012  | -31301 | Cpm                |
| chr11:114494495-114494995 | 16 | 35115  | -35111 | Rpl38              |
| chr4:146890365-146890865  | 16 | 500000 | -36800 | OTTMUSG00000010673 |
| chr16:5936330-5936830     | 16 | 500000 | -39099 | AK018984           |
| chr10:117025570-117026070 | 16 | 40452  | -40741 | Cpm                |
| chr6:97305475-97305975    | 16 | 500000 | -43352 | Frmd4b             |
| chr5:89271785-89272285    | 16 | 43554  | -44249 | Slc4a4             |
| chr4:146882070-146882570  | 16 | 500000 | -45095 | OTTMUSG00000010673 |
| chr12:105760035-105760535 | 16 | 47410  | -48840 | Gsc                |
| chr1:24740810-24741310    | 15 | 500000 | 500000 |                    |
| chr1:61322995-61323495    | 15 | 500000 | 500000 |                    |
| chr1:91146425-91146925    | 15 | 500000 | 500000 |                    |
| chr2:10981705-10982205    | 15 | 500000 | 500000 |                    |
| chr2:28152440-28152940    | 15 | 500000 | 500000 |                    |
| chr2:76046935-76047435    | 15 | 500000 | 500000 |                    |
| chr2:94364670-94365170    | 15 | 500000 | 500000 |                    |
| chr3:25942165-25942665    | 15 | 500000 | 500000 |                    |
| chr3:50706700-50707200    | 15 | 500000 | 500000 |                    |
| chr3:55461770-55462270    | 15 | 500000 | 500000 |                    |
| chr3:103250650-103251150  | 15 | 500000 | 500000 |                    |
| chr3:110190750-110191250  | 15 | 500000 | 500000 |                    |
| chr3:149377975-149378475  | 15 | 500000 | 500000 |                    |
| chr4:58352150-58352650    | 15 | 500000 | 500000 |                    |
| chr4:130417690-130418190  | 15 | 104    | 500000 |                    |
| chr4:139660995-139661495  | 15 | 3970   | 500000 |                    |

|                           |    |        |        |
|---------------------------|----|--------|--------|
| chr4:145001420-145001920  | 15 | 500000 | 500000 |
| chr4:150934360-150934860  | 15 | 500000 | 500000 |
| chr4:152330540-152331040  | 15 | 500000 | 500000 |
| chr5:33777005-33777505    | 15 | 0      | 500000 |
| chr7:71802820-71803320    | 15 | 500000 | 500000 |
| chr7:89484415-89484915    | 15 | 0      | 500000 |
| chr7:129940250-129940750  | 15 | 500000 | 500000 |
| chr8:35287145-35287645    | 15 | 500000 | 500000 |
| chr8:77288580-77289080    | 15 | 500000 | 500000 |
| chr8:81278270-81278770    | 15 | 500000 | 500000 |
| chr8:82023710-82024210    | 15 | 500000 | 500000 |
| chr8:86897350-86897850    | 15 | 40561  | 500000 |
| chr8:90303580-90304080    | 15 | 833    | 500000 |
| chr8:90306765-90307265    | 15 | 0      | 500000 |
| chr8:91361920-91362420    | 15 | 500000 | 500000 |
| chr8:94013025-94013525    | 15 | 500000 | 500000 |
| chr9:22840450-22840950    | 15 | 500000 | 500000 |
| chr9:56644775-56645275    | 15 | 151    | 500000 |
| chr9:99770045-99770545    | 15 | 164    | 500000 |
| chr9:99771195-99771695    | 15 | 95     | 500000 |
| chr10:25876170-25876670   | 15 | 500000 | 500000 |
| chr10:44652630-44653130   | 15 | 500000 | 500000 |
| chr10:57154590-57155090   | 15 | 500000 | 500000 |
| chr10:88849385-88849885   | 15 | 41755  | 500000 |
| chr10:98656950-98657450   | 15 | 500000 | 500000 |
| chr10:98659130-98659630   | 15 | 500000 | 500000 |
| chr10:110702520-110703020 | 15 | 32720  | 500000 |
| chr11:118556250-118556750 | 15 | 500000 | 500000 |
| chr13:13952975-13953475   | 15 | 500000 | 500000 |
| chr13:42309015-42309515   | 15 | 500000 | 500000 |
| chr13:95477020-95477520   | 15 | 3140   | 500000 |
| chr14:49188560-49189060   | 15 | 500000 | 500000 |
| chr14:59472550-59473050   | 15 | 500000 | 500000 |
| chr15:74084625-74085125   | 15 | 500000 | 500000 |
| chr15:87233000-87233500   | 15 | 500000 | 500000 |
| chr15:95829880-95830380   | 15 | 500000 | 500000 |
| chr16:3351370-3351870     | 15 | 500000 | 500000 |
| chr17:30858575-30859075   | 15 | 500000 | 500000 |
| chr17:30885960-30886460   | 15 | 500000 | 500000 |
| chr17:30888700-30889200   | 15 | 500000 | 500000 |
| chr17:73868880-73869380   | 15 | 500000 | 500000 |
| chr17:86177630-86178130   | 15 | 21532  | 500000 |
| chr18:4234360-4234860     | 15 | 500000 | 500000 |
| chr18:39716645-39717145   | 15 | 500000 | 500000 |
| chrX:143717235-143717735  | 15 | 500000 | 500000 |
| chrX:147604040-147604540  | 15 | 48     | 500000 |

|                           |    |        |        |               |
|---------------------------|----|--------|--------|---------------|
| chrX:158346350-158346850  | 15 | 0      | 500000 |               |
| chr7:75144000-75144500    | 15 | 45983  | 47108  | Igf1r         |
| chr4:145154550-145155050  | 15 | 12193  | 45965  | BC086318      |
| chr4:145152885-145153385  | 15 | 13858  | 44300  | BC086318      |
| chr4:153969850-153970350  | 15 | 38791  | 40374  | 5930403L14Rik |
| chrX:63941380-63941880    | 15 | 500000 | 35297  | Slitrk2       |
| chr17:33600560-33601060   | 15 | 500000 | 30967  | 1700029I08Rik |
| chr4:122750910-122751410  | 15 | 30701  | 30205  | Trit1         |
| chr19:7250920-7251420     | 15 | 10450  | 29603  | Otub1         |
| chr10:114893375-114893875 | 15 | 500000 | 29265  | Ccdc131       |
| chr10:122409690-122410190 | 15 | 12340  | 27801  | AK021038      |
| chr4:145135575-145136075  | 15 | 31168  | 26990  | BC086318      |
| chr4:107329160-107329660  | 15 | 26739  | 26771  | Dmrtb1        |
| chr15:79309665-79310165   | 15 | 5839   | 25755  | Kcnj4         |
| chr2:13167745-13168245    | 15 | 24881  | 24909  | Rsu1          |
| chr12:70551970-70552470   | 15 | 500000 | 24313  | AK039829      |
| chr15:89354970-89355470   | 15 | 507    | 23507  | Shank3        |
| chr2:94081650-94082150    | 15 | 131    | 23014  | AK140370      |
| chr11:74199355-74199855   | 15 | 500000 | 21433  | Olfr412       |
| chr1:57922915-57923415    | 15 | 500000 | 20751  | 2810022L02Rik |
| chr8:85946820-85947320    | 15 | 19018  | 19476  | Scoc          |
| chr7:142871685-142872185  | 15 | 35587  | 18835  | Mki67         |
| chr15:84040960-84041460   | 15 | 18292  | 18548  | Samm50        |
| chr7:103963315-103963815  | 15 | 500000 | 18415  | ten-m4        |
| chr11:115110195-115110695 | 15 | 758    | 18111  | Grin2c        |
| chr15:97816910-97817410   | 15 | 15161  | 17915  | Col2a1        |
| chr7:103962680-103963180  | 15 | 500000 | 17780  | ten-m4        |
| chr15:75560770-75561270   | 15 | 1014   | 17331  | Mafa          |
| chr17:30957060-30957560   | 15 | 500000 | 17303  | Dnahc8        |
| chr17:24192135-24192635   | 15 | 17663  | 17176  | Prss27        |
| chr18:44318470-44318970   | 15 | 500000 | 16006  | AK020535      |
| chr5:149979640-149980140  | 15 | 15799  | 15748  | AK082086      |
| chr8:87261260-87261760    | 15 | 21244  | 14605  | AK168184      |
| chr5:148783050-148783550  | 15 | 13719  | 14405  | C130038G02Rik |
| chr7:24552350-24552850    | 15 | 500000 | 13671  | V1rd22        |
| chr15:75565140-75565640   | 15 | 2950   | 12961  | Mafa          |
| chr1:90147220-90147720    | 15 | 26318  | 12788  | AK133186      |
| chr4:100188105-100188605  | 15 | 500000 | 12050  | AK085758      |
| chr1:90146180-90146680    | 15 | 27358  | 11748  | AK133186      |
| chr2:130133080-130133580  | 15 | 11367  | 11656  | Ebf4          |
| chr19:43815665-43816165   | 15 | 11304  | 11555  | Cox15         |
| chr13:23504380-23504880   | 15 | 10743  | 11104  | Abt1          |
| chr15:77462440-77462940   | 15 | 500000 | 10626  | EG626615      |
| chr10:127349430-127349930 | 15 | 500000 | 10550  | Sdro          |
| chr1:90118635-90119135    | 15 | 16511  | 10352  | Ugt1a1        |
| chr6:126474840-126475340  | 15 | 500000 | 10339  | Kcna5         |



|                           |    |        |      |               |
|---------------------------|----|--------|------|---------------|
| chr7:26433895-26434395    | 15 | 9974   | 9610 | Bckdha        |
| chr10:41985790-41986290   | 15 | 8497   | 9363 | Foxo3a        |
| chr1:90163495-90163995    | 15 | 10043  | 9014 | A730008H23Rik |
| chr2:153996650-153997150  | 15 | 500000 | 8557 | 2310021H06Rik |
| chr17:24062130-24062630   | 15 | 533    | 7956 | Dcpp3         |
| chr15:83723880-83724380   | 15 | 500000 | 7639 | mKIAA1672     |
| chr3:88949185-88949685    | 15 | 12878  | 7546 | AK177718      |
| chr1:90207030-90207530    | 15 | 33002  | 7423 | Trpm8         |
| chr15:58906310-58906810   | 15 | 6272   | 6983 | Mtss1         |
| chr11:114959265-114959765 | 15 | 6377   | 6771 | Rab37         |
| chr2:3259840-3260340      | 15 | 10063  | 6651 | 9230116B18Rik |
| chr11:114916790-114917290 | 15 | 35724  | 6311 | Cd300e        |
| chr1:133090265-133090765  | 15 | 40609  | 6159 | Rassf5        |
| chr7:149141495-149141995  | 15 | 5159   | 6090 | mKIAA4256     |
| chr5:135819650-135820150  | 15 | 5821   | 5844 | Fkbp6         |
| chr5:140389120-140389620  | 15 | 319    | 5474 | A930017N06Rik |
| chr3:116666150-116666650  | 15 | 500000 | 5469 | Palmd         |
| chr3:128907780-128908280  | 15 | 439    | 5195 | Pitx2         |
| chr12:112718870-112719370 | 15 | 4241   | 4886 | Gm266         |
| chr10:83190055-83190555   | 15 | 4332   | 4663 | AK005183      |
| chr3:89563690-89564190    | 15 | 4380   | 4566 | Chrn2         |
| chr4:128565555-128566055  | 15 | 3967   | 4422 | Trim62        |
| chr15:74350660-74351160   | 15 | 681    | 4285 | Bai1          |
| chr4:114736060-114736560  | 15 | 83     | 4187 | Tal1          |
| chr4:124667555-124668055  | 15 | 300    | 4132 | Rspo1         |
| chr8:24089090-24089590    | 15 | 3162   | 4025 | Ank1          |
| chr5:140023555-140024055  | 15 | 40     | 3954 | Uncx4         |
| chr8:123644070-123644570  | 15 | 2228   | 3838 | Foxc2         |
| chr15:84158695-84159195   | 15 | 500000 | 3796 | Parvg         |
| chr1:157585120-157585620  | 15 | 259    | 3786 | Lhx4          |
| chr3:100289190-100289690  | 15 | 2845   | 3665 | Fam46c        |
| chr11:5962040-5962540     | 15 | 2709   | 3460 | Camk2b        |
| chr11:101824775-101825275 | 15 | 93     | 3303 | Sost          |
| chr15:98623290-98623790   | 15 | 178    | 3253 | Wnt1          |
| chr17:26975070-26975570   | 15 | 256    | 3189 | Nkx2-5        |
| chr19:43459445-43459945   | 15 | 1022   | 3105 | LOC545291     |
| chr5:9103580-9104080      | 15 | 2378   | 3094 | 4930420K17Rik |
| chr8:79421205-79421705    | 15 | 1717   | 3064 | AK162930      |
| chr15:102164980-102165480 | 15 | 2772   | 3062 | Myg1          |
| chr18:75529730-75530230   | 15 | 1317   | 2962 | Smad7         |
| chr10:61598385-61598885   | 15 | 1999   | 2798 | Neurog3       |
| chr18:64502550-64503050   | 15 | 131    | 2783 | Onecut2       |
| chr9:102253970-102254470  | 15 | 1348   | 2742 | Ephb1         |
| chr2:179836050-179836550  | 15 | 1725   | 2626 | Hrh3          |
| chr5:140022190-140022690  | 15 | 27     | 2589 | Uncx4         |
| chr4:151760925-151761425  | 15 | 23614  | 2582 | mKIAA0444     |

|                           |    |        |      |                    |
|---------------------------|----|--------|------|--------------------|
| chr19:54122030-54122530   | 15 | 107    | 2531 | Adra2a             |
| chr15:78223575-78224075   | 15 | 12231  | 2489 | Ean57              |
| chr14:35635540-35636040   | 15 | 275    | 2469 | Grid1              |
| chr3:96331320-96331820    | 15 | 30030  | 2463 | Hfe2               |
| chr17:56128080-56128580   | 15 | 11621  | 2397 | Fsd1               |
| chr15:75917805-75918305   | 15 | 2640   | 2387 | Nrbp2              |
| chr8:123642590-123643090  | 15 | 748    | 2358 | Foxc2              |
| chr14:122871910-122872410 | 15 | 1070   | 2260 | AK011684           |
| chr5:31359165-31359665    | 15 | 1840   | 2232 | Cad                |
| chr10:119911575-119912075 | 15 | 150    | 2165 | Hmga2              |
| chr3:8664665-8665165      | 15 | 0      | 2122 | Hey1               |
| chr11:84336720-84337220   | 15 | 570    | 2065 | Lhx1               |
| chr15:84683335-84683835   | 15 | 308    | 1943 | Phf21b             |
| chr5:34340180-34340680    | 15 | 96     | 1798 | Nat8l              |
| chr4:28741830-28742330    | 15 | 0      | 1779 | Epha7              |
| chr11:118768860-118769360 | 15 | 154    | 1775 | D11Bwg0517e        |
| chr11:103636840-103637340 | 15 | 1354   | 1553 | Wnt3               |
| chr2:164542030-164542530  | 15 | 28949  | 1476 | OTTMUSG00000016293 |
| chr8:73018280-73018780    | 15 | 280    | 1476 | Crif1              |
| chr19:54120960-54121460   | 15 | 0      | 1461 | Adra2a             |
| chr17:27694705-27695205   | 15 | 60     | 1429 | Hmga1              |
| chr10:57693790-57694290   | 15 | 24052  | 1382 | Dux                |
| chr8:94882725-94883225    | 15 | 0      | 1281 | Irx5               |
| chr11:32166095-32166595   | 15 | 993    | 1268 | Mpg                |
| chr12:28026065-28026565   | 15 | 0      | 1261 | Sox11              |
| chr2:102499810-102500310  | 15 | 557    | 1221 | Slc1a2             |
| chr17:46691655-46692155   | 15 | 34     | 1205 | Srf                |
| chr6:99643600-99644100    | 15 | 400    | 1178 | Gpr27              |
| chr1:173510120-173510620  | 15 | 500000 | 1177 | 2b4                |
| chr11:68198960-68199460   | 15 | 0      | 1117 | Ntn1               |
| chr12:73335390-73335890   | 15 | 1814   | 1085 | Rtn-1A             |
| chr17:88196020-88196520   | 15 | 31     | 1063 | Kcnk12             |
| chr10:127534235-127534735 | 15 | 0      | 1054 | Baz2a              |
| chr4:84191025-84191525    | 15 | 0      | 1033 | Bnc2               |
| chr9:58005695-58006195    | 15 | 39845  | 1003 | Islr               |
| chr6:4698050-4698550      | 15 | 0      | 995  | Peg10              |
| chr11:18914625-18915125   | 15 | 4012   | 984  | AK144295           |
| chr12:53605685-53606185   | 15 | 0      | 977  | Arhgap5            |
| chr19:42165615-42166115   | 15 | 337    | 941  | Pi4k2a             |
| chr4:151713445-151713945  | 15 | 472    | 936  | Chd5               |
| chr16:11984815-11985315   | 15 | 0      | 860  | BC030884           |
| chr6:94649040-94649540    | 15 | 0      | 848  | Lrig1              |
| chr4:131603815-131604315  | 15 | 248    | 834  | Epb4               |
| chr8:35871240-35871740    | 15 | 0      | 827  | Dusp4              |
| chr4:48598630-48599130    | 15 | 84     | 816  | Tmeff1             |
| chr5:111238040-111238540  | 15 | 307    | 809  | Ulk1               |

|                           |    |      |     |               |
|---------------------------|----|------|-----|---------------|
| chr8:80959505-80960005    | 15 | 0    | 795 | Pou4f2        |
| chr1:64166920-64167420    | 15 | 1017 | 792 | Klf7          |
| chr4:118966080-118966580  | 15 | 0    | 787 | Ybx1          |
| chr12:70993115-70993615   | 15 | 105  | 784 | Map4k5        |
| chr13:101602350-101602850 | 15 | 20   | 781 | Slc30a5       |
| chr6:28210575-28211075    | 15 | 115  | 775 | Zfp800        |
| chr3:55986620-55987120    | 15 | 0    | 752 | nbea          |
| chr3:66024305-66024805    | 15 | 8    | 747 | Ptx3          |
| chr2:180191520-180192020  | 15 | 60   | 732 | Slco4a1       |
| chr10:19654770-19655270   | 15 | 105  | 732 | Map3k5        |
| chr10:60735210-60735710   | 15 | 415  | 725 | Adamts14      |
| chr10:51953880-51954380   | 15 | 0    | 706 | Dcbld1        |
| chr5:124133350-124133850  | 15 | 0    | 699 | Clip1         |
| chr11:96975650-96976150   | 15 | 0    | 688 | Tbx21         |
| chr14:48269420-48269920   | 15 | 0    | 685 | Ktn1          |
| chr15:26824385-26824885   | 15 | 24   | 683 | Fbxl7         |
| chr14:26279205-26279705   | 15 | 0    | 678 | Zmiz1         |
| chr11:117516705-117517205 | 15 | 0    | 677 | Tnrc6c        |
| chr2:32236480-32236980    | 15 | 292  | 673 | 1110008P14Rik |
| chr5:148082180-148082680  | 15 | 227  | 666 | AK008755      |
| chr7:86874030-86874530    | 15 | 7779 | 660 | Plin          |
| chr11:103635935-103636435 | 15 | 449  | 648 | Wnt3          |
| chr9:72123100-72123600    | 15 | 141  | 645 | Suhw4         |
| chr6:90413005-90413505    | 15 | 9    | 636 | Klf15         |
| chr17:51971090-51971590   | 15 | 0    | 617 | Satb1         |
| chr2:28048970-28049470    | 15 | 291  | 608 | Olfm1         |
| chr10:119913145-119913645 | 15 | 0    | 595 | Hmga2         |
| chr10:33926515-33927015   | 15 | 0    | 591 | Dse           |
| chr15:97737895-97738395   | 15 | 263  | 581 | Vdr           |
| chr5:37730070-37730570    | 15 | 436  | 574 | Evc2          |
| chr13:40823495-40823995   | 15 | 0    | 567 | Tcfap2a       |
| chr11:35583310-35583810   | 15 | 0    | 564 | Pank3         |
| chr7:140967690-140968190  | 15 | 225  | 545 | Dhx32         |
| chr19:42275825-42276325   | 15 | 0    | 545 | Sfrp5         |
| chr8:35217930-35218430    | 15 | 266  | 539 | Tmem66        |
| chr1:84835105-84835605    | 15 | 0    | 523 | Trip12        |
| chr19:42222160-42222660   | 15 | 0    | 521 | Marveld1      |
| chr1:14299510-14300010    | 15 | 68   | 519 | Eya1          |
| chr8:122081860-122082360  | 15 | 187  | 516 | Mbtps1        |
| chr9:69607880-69608380    | 15 | 0    | 503 | Foxb1         |
| chr14:18493720-18494220   | 15 | 303  | 497 | Thrb          |
| chr10:80640645-80641145   | 15 | 1096 | 495 | Eef2          |
| chr1:74938970-74939470    | 15 | 79   | 488 | Cryba2        |
| chr8:126544170-126544670  | 15 | 260  | 487 | Taf5l         |
| chr8:87189260-87189760    | 15 | 1227 | 484 | AK037841      |
| chr13:104967820-104968320 | 15 | 709  | 475 | 2410002O22Rik |

|                           |    |        |     |               |
|---------------------------|----|--------|-----|---------------|
| chr5:111309065-111309565  | 15 | 0      | 472 | AK009368      |
| chrX:166411030-166411530  | 15 | 11576  | 464 | Fxy           |
| chr16:32099100-32099600   | 15 | 127    | 460 | Pigx          |
| chr2:113056520-113057020  | 15 | 352    | 448 | Ryr3          |
| chr14:120877880-120878380 | 15 | 0      | 448 | Rap2a         |
| chr8:90642895-90643395    | 15 | 177    | 447 | Tmem188       |
| chr2:5059015-5059515      | 15 | 126    | 444 | Ccdc3         |
| chr5:134789890-134790390  | 15 | 0      | 422 | Gtf2i         |
| chr8:112088830-112089330  | 15 | 235    | 420 | Dhx38         |
| chr1:90172105-90172605    | 15 | 1433   | 404 | A730008H23Rik |
| chr11:115970675-115971175 | 15 | 0      | 404 | Trim47        |
| chr10:122701280-122701780 | 15 | 0      | 399 | AI851790      |
| chr14:21656060-21656560   | 15 | 42800  | 382 | Plau          |
| chr4:151665145-151665645  | 15 | 557    | 375 | Hes3          |
| chr5:144131890-144132390  | 15 | 204    | 370 | Grid2ip       |
| chr14:56380380-56380880   | 15 | 185    | 366 | Ltb4r2        |
| chr11:77030030-77030530   | 15 | 86     | 354 | Ssh2          |
| chr1:24593675-24594175    | 15 | 0      | 350 | Col19a1       |
| chr4:155577510-155578010  | 15 | 0      | 348 | AK078660      |
| chr6:81991755-81992255    | 15 | 77     | 339 | Tmem166       |
| chr1:5008950-5009450      | 15 | 0      | 259 | Rgs20         |
| chr13:55423420-55423920   | 15 | 0      | 255 | Prelid1       |
| chr2:19367280-19367780    | 15 | 0      | 241 | Ptf1a         |
| chr11:16157760-16158260   | 15 | 66     | 236 | Vstm2a        |
| chr4:40917960-40918460    | 15 | 0      | 235 | Nfx1          |
| chr11:76212140-76212640   | 15 | 0      | 235 | Nxn           |
| chr11:53583980-53584480   | 15 | 72     | 234 | Irf1          |
| chr1:193915965-193916465  | 15 | 0      | 229 | Traf5         |
| chr2:154233340-154233840  | 15 | 0      | 226 | Snta1         |
| chr8:83866430-83866930    | 15 | 103    | 226 | Inpp4b        |
| chr2:131855070-131855570  | 15 | 111    | 225 | Rassf2        |
| chr7:90015125-90015625    | 15 | 0      | 208 | AK076849      |
| chr19:34953490-34953990   | 15 | 4      | 201 | Pank1         |
| chr9:30729590-30730090    | 15 | 0      | 196 | Adamts15      |
| chr14:55195815-55196315   | 15 | 0      | 187 | Jub           |
| chr2:130276200-130276700  | 15 | 0      | 175 | Ptpra         |
| chr2:165980740-165981240  | 15 | 0      | 165 | Sulf2         |
| chr16:62854035-62854535   | 15 | 6      | 126 | Pros1         |
| chr12:52929980-52930480   | 15 | 0      | 109 | Hectd1        |
| chr17:29235010-29235510   | 15 | 113    | 109 | Cdkn1a        |
| chr16:58523070-58523570   | 15 | 0      | 104 | St3gal6       |
| chr12:85534635-85535135   | 15 | 0      | 94  | C130039O16Rik |
| chr5:104121280-104121780  | 15 | 0      | 92  | Aff1          |
| chr12:85410110-85410610   | 15 | 103    | 86  | Acot5         |
| chr15:7347975-7348475     | 15 | 0      | 78  | Egflam        |
| chr3:120874285-120874785  | 15 | 500000 | 76  | Rwdd3         |

|                           |    |        |       |               |
|---------------------------|----|--------|-------|---------------|
| chr19:21346585-21347085   | 15 | 0      | 68    | Zfand5        |
| chr13:93196870-93197370   | 15 | 124    | 58    | AK047727      |
| chr11:85645920-85646420   | 15 | 0      | 54    | Tbx2          |
| chr1:182571260-182571760  | 15 | 0      | 46    | Lin9          |
| chr13:37918570-37919070   | 15 | 0      | 20    | Rreb1         |
| chr15:27955340-27955840   | 15 | 0      | 12    | Trio          |
| chr1:40522150-40522650    | 15 | 500000 | 4     | Il18r1        |
| chr13:113836348-113836848 | 15 | 10965  | 0     | 2310016C16Rik |
| chr18:77094880-77095380   | 15 | 0      | -13   | Corl2         |
| chr4:136604380-136604880  | 15 | 0      | -21   | Zbtb40        |
| chr5:20207800-20208300    | 15 | 0      | -44   | AK028130      |
| chr12:103367320-103367820 | 15 | 0      | -58   | Slc24a4       |
| chr10:45297320-45297820   | 15 | 2      | -124  | Hace1         |
| chr16:85173830-85174330   | 15 | 0      | -133  | App           |
| chr2:29201920-29202420    | 15 | 126    | -185  | Med27         |
| chr11:51102960-51103460   | 15 | 59     | -211  | Col23a1       |
| chr3:61167965-61168465    | 15 | 180    | -213  | Rap2b         |
| chr9:123587980-123588480  | 15 | 154    | -281  | Xtrp3s1       |
| chr16:17069860-17070360   | 15 | 132    | -293  | Ypel1         |
| chr15:30101800-30102300   | 15 | 63     | -297  | Ctnnd2        |
| chr6:91361435-91361935    | 15 | 152    | -323  | Wnt7a         |
| chr13:31717035-31717535   | 15 | 82     | -362  | Foxf2         |
| chr16:22163485-22163985   | 15 | 299    | -364  | Igf2bp2       |
| chr18:24867330-24867830   | 15 | 152    | -365  | FHOS2         |
| chr11:114712515-114713015 | 15 | 0      | -390  | Gprc5c        |
| chr1:97564330-97564830    | 15 | 236    | -410  | ST8SiaIV      |
| chr6:38500690-38501190    | 15 | 102    | -578  | Luc7l2        |
| chr11:98244240-98244740   | 15 | 1040   | -634  | Tcap          |
| chr11:103509880-103510380 | 15 | 697    | -692  | Rprml         |
| chr15:76353010-76353510   | 15 | 0      | -702  | Scrt1         |
| chr11:116513820-116514320 | 15 | 896    | -777  | Prcd          |
| chr10:24316145-24316645   | 15 | 504    | -778  | AK014660      |
| chr4:47005140-47005640    | 15 | 333    | -805  | Gabbr2        |
| chr5:65193700-65194200    | 15 | 0      | -811  | Klf3          |
| chr8:11727105-11727605    | 15 | 80     | -813  | Arhgef7       |
| chr12:54348600-54349100   | 15 | 488    | -813  | Npas3         |
| chr4:128287850-128288350  | 15 | 19372  | -823  | Zscan20       |
| chr8:91568655-91569155    | 15 | 201    | -845  | Sall1         |
| chr7:152023430-152023930  | 15 | 144    | -932  | Fgf3          |
| chr4:153515005-153515505  | 15 | 327    | -939  | Trp73         |
| chr4:151503800-151504300  | 15 | 740    | -1017 | Espn          |
| chr10:114239210-114239710 | 15 | 203    | -1041 | Trhde         |
| chr9:62997620-62998120    | 15 | 652    | -1103 | Lbxcor1       |
| chr5:48374625-48375125    | 15 | 0      | -1156 | Slit2         |
| chr16:32429670-32430170   | 15 | 783    | -1161 | Pcyt1a        |
| chr2:180625365-180625865  | 15 | 590    | -1198 | AK045142      |

|                           |    |        |        |               |
|---------------------------|----|--------|--------|---------------|
| chr15:79336910-79337410   | 15 | 586    | -1490  | Kcnj4         |
| chr8:122753370-122753870  | 15 | 0      | -1491  | AK039624      |
| chr16:90384865-90385365   | 15 | 863    | -1526  | Hunk          |
| chr2:151967480-151967980  | 15 | 1219   | -1614  | Tcf15         |
| chr4:21614510-21615010    | 15 | 813    | -1651  | Prdm13        |
| chr14:51708940-51709440   | 15 | 500000 | -1680  | Ang           |
| chr4:125165770-125166270  | 15 | 1174   | -2054  | Grik3         |
| chr10:94409160-94409660   | 15 | 1210   | -2199  | Plxnc1        |
| chr17:26247650-26248150   | 15 | 2098   | -2361  | Tmem8         |
| chr10:126619980-126620480 | 15 | 2699   | -2593  | C78409        |
| chr8:19919265-19919765    | 15 | 26335  | -2645  | AK166824      |
| chr14:63800855-63801355   | 15 | 4093   | -2691  | Fdft1         |
| chr17:29748455-29748955   | 15 | 2957   | -3070  | Rnf8          |
| chr3:102270420-102270920  | 15 | 3176   | -3180  | Ngfb          |
| chr14:33845880-33846380   | 15 | 500000 | -3968  | Wdfy4         |
| chr4:22419050-22419550    | 15 | 1606   | -4023  | Pou3f2        |
| chr18:36009580-36010080   | 15 | 10324  | -4514  | Cxxc5         |
| chr8:89108915-89109415    | 15 | 38818  | -4581  | Abcc12        |
| chr5:112825720-112826220  | 15 | 1919   | -4738  | Asphd2        |
| chr15:99496145-99496645   | 15 | 4294   | -4753  | Accn2         |
| chr11:76480750-76481250   | 15 | 890    | -4971  | A830053O21Rik |
| chr3:96142805-96143305    | 15 | 10719  | -6154  | AK135774      |
| chr12:104130950-104131450 | 15 | 14336  | -6315  | Cox8c         |
| chr9:108172565-108173065  | 15 | 6556   | -6561  | Dag1          |
| chr3:89160750-89161250    | 15 | 6591   | -7069  | Adam15        |
| chr3:88003230-88003730    | 15 | 953    | -7254  | AK141565      |
| chr1:157596340-157596840  | 15 | 6215   | -7434  | Lhx4          |
| chr1:173473175-173473675  | 15 | 39094  | -8002  | Itln1         |
| chr9:114588550-114589050  | 15 | 8785   | -9148  | Dync1li1      |
| chr2:77127650-77128150    | 15 | 8930   | -9252  | Sestd1        |
| chr17:34796590-34797090   | 15 | 11267  | -10639 | Tnxb          |
| chr18:31782435-31782935   | 15 | 10951  | -11351 | Sap130        |
| chr17:15057635-15058135   | 15 | 22053  | -11362 | Wdr27         |
| chr3:93618280-93618780    | 15 | 500000 | -11411 | Tdpoz3        |
| chr2:180221930-180222430  | 15 | 12405  | -12500 | Ntsr1         |
| chr1:90187010-90187510    | 15 | 12982  | -12597 | Trpm8         |
| chr4:62862900-62863400    | 15 | 11846  | -13295 | Col27a1       |
| chr5:37393505-37394005    | 15 | 13093  | -13535 | Wfs1          |
| chr4:135394900-135395400  | 15 | 16356  | -16856 | nssr 1        |
| chr19:55236890-55237390   | 15 | 500000 | -18234 | Tectb         |
| chr3:96130510-96131010    | 15 | 1302   | -18449 | AK135774      |
| chr11:49696180-49696680   | 15 | 18654  | -18906 | Rasgef1c      |
| chr3:40407310-40407810    | 15 | 22871  | -22647 | Pdzd6         |
| chr10:116753145-116753645 | 15 | 500000 | -23472 | Lyz           |
| chr4:145028725-145029225  | 15 | 24469  | -25137 | NR_002888     |
| chr8:22139685-22140185    | 15 | 500000 | -25288 | Defcr21       |

|                          |    |        |        |               |
|--------------------------|----|--------|--------|---------------|
| chr1:155561530-155562030 | 15 | 500000 | -25723 | Rgs16         |
| chr15:83581295-83581795  | 15 | 25877  | -26095 | Scube1        |
| chr18:32137535-32138035  | 15 | 38756  | -28496 | Gpr17         |
| chr8:85357850-85358350   | 15 | 29239  | -29154 | mKIAA1214     |
| chr18:36226870-36227370  | 15 | 653    | -29154 | AY227026      |
| chr2:145582000-145582500 | 15 | 500000 | -29632 | Rin2          |
| chr6:94418935-94419435   | 15 | 30931  | -31156 | Slc25a26      |
| chr11:95480170-95480670  | 15 | 26441  | -31409 | Ngfr          |
| chr3:32296340-32296840   | 15 | 0      | -32004 | Zmat3         |
| chr10:87998430-87998930  | 15 | 500000 | -32071 | Chpt1         |
| chr11:5084060-5084560    | 15 | 31749  | -32086 | Emid1         |
| chr4:145020285-145020785 | 15 | 32909  | -33577 | NR_002888     |
| chr12:88103065-88103565  | 15 | 35807  | -35915 | Angel1        |
| chr10:84342810-84343310  | 15 | 37199  | -37300 | Ric8b         |
| chr7:146210425-146210925 | 15 | 1951   | -37830 | mKIAA4091     |
| chr17:30065420-30065920  | 15 | 38786  | -40844 | Mdga1         |
| chr16:92740100-92740600  | 15 | 41215  | -42778 | Runx1         |
| chr4:3155580-3156080     | 15 | 2307   | -43379 | LOC171266     |
| chr10:81748050-81748550  | 15 | 500000 | -44276 | B230315N1ORik |
| chr4:149942780-149943280 | 15 | 328    | -47837 | Rere          |
| chr10:57157500-57158000  | 15 | 48245  | -48541 | Hsf2          |

---
